# Supplementary material for: No excessive mutations in transcription activator-like effector nuclease-mediated α-1,3-galactosyltransferase knockout Yucatan miniature pigs
Source: PubMed Central journal article supplement (PMC6946973; doi:10.5713/ajas.19.0480), 2019-08-23
Supplement: ajas-19-0480-suppl1.pdf [file ajas-19-0480-suppl1.pdf]

Supplementary Table 1. Variant calls of TALEN-edited pig CJ1

| #CHROM | POS       | ID | REF | ALT | QUAL    | FILTER | DP  | Donor | CJ1 | CB1 | CB3 | WT1 | WT2 | WT3 | EFF[*].EFF<br>ECT | EFF[*].JMP<br>ACT | EFF[*].FU<br>NCLASS | EFF[*].CO<br>DON | EFF[*].AA<br>EFF[*].AA | EFF[*].AA_<br>LEN | EFF[*].GENE                | EFF[*].BIO<br>TYPE | EFF[*].CO<br>DING | EFF[*].TRI<br>D | EFF[*].RA<br>NK |
|--------|-----------|----|-----|-----|---------|--------|-----|-------|-----|-----|-----|-----|-----|-----|-------------------|-------------------|---------------------|------------------|------------------------|-------------------|----------------------------|--------------------|-------------------|-----------------|-----------------|
| 1      | 190448139 |    | A   | G   | 1167.65 |        | 122 | 0/0   | 1/1 | 0/1 | 1/1 | 1/1 | 1/1 | 1/1 | intergenic_       | MODIFIER          | NONE                |                  |                        | -1                | 5S_rRNA-U6                 |                    |                   | -1              |                 |
| 3      | 33134141  |    | C   | T   | 1105.93 |        | 145 | 0/0   | 1/1 | 0/1 | 1/1 | 1/1 | 0/1 | 1/1 | intron_vari       | MODIFIER          | NONE                | c.376+331C>T     |                        | -1                | ENSSSCG00000007901         | protein_coding     | ENSSSCT01         | 5               |                 |
| 3      | 142488536 |    | A   | C   | 1213.04 |        | 702 | 1/1   | 0/0 | .   | 1/1 | 1/1 | 1/1 | .   | intergenic_       | MODIFIER          | NONE                |                  |                        | -1                | ACP1-ENSSSCG00000008661    |                    |                   | -1              |                 |
| 5      | 28871833  |    | A   | G   | 1001.13 |        | 160 | 1/1   | 0/0 | 1/1 | 1/1 | 1/1 | 0/1 | 1/1 | intergenic_       | MODIFIER          | NONE                |                  |                        | -1                | U6-ENSSSCG00000000457      |                    |                   | -1              |                 |
| 6      | 29004053  |    | G   | C   | 1151.74 |        | 119 | 1/1   | 0/0 | 1/1 | 1/1 | 1/1 | 1/1 | 1/1 | intergenic_       | MODIFIER          | NONE                |                  |                        | -1                | ENSSSCG00000002834-TOX3    |                    |                   | -1              |                 |
| 6      | 145141339 |    | C   | T   | 1024.87 |        | 151 | 1/1   | 0/0 | 0/0 | 1/1 | 1/1 | 0/1 | 1/1 | intergenic_       | MODIFIER          | NONE                |                  |                        | -1                | PPAP2B-ENSSSCG000000024345 |                    |                   | -1              |                 |
| 8      | 33762665  |    | GT  | G   | 1159.43 |        | 216 | 0/0   | 1/1 | 1/1 | 1/1 | 1/1 | 1/1 | 0/1 | intergenic_       | MODIFIER          | NONE                |                  |                        | -1                | NSUN7-U6                   |                    |                   | -1              |                 |
| 9      | 4683739   |    | A   | G   | 1065.02 |        | 152 | 0/0   | 1/1 | 0/1 | 1/1 | 1/1 | 1/1 | 1/1 | intergenic_       | MODIFIER          | NONE                |                  |                        | -1                | ENSSSCG000000014673-TRIM6  |                    |                   | -1              |                 |
| 9      | 10086967  |    | A   | G   | 1858.4  |        | 186 | 1/1   | 0/0 | 1/1 | 1/1 | 1/1 | 1/1 | 1/1 | intron_vari       | MODIFIER          | NONE                | c.98-701T>C      |                        | -1                | CHRD2                      | protein_coding     | ENSSSCT01         | 1               |                 |
| 11     | 2234773   |    | T   | C   | 1143.95 |        | 132 | 1/1   | 0/0 | 0/1 | 1/1 | 1/1 | 0/0 | 1/1 | intron_vari       | MODIFIER          | NONE                | c.55+21048A>G    |                        | -1                | ENSSSCG00000009293         | protein_coding     | ENSSSCT01         | 1               |                 |
| 14     | 11250816  |    | G   | T   | 1477.15 |        | 177 | 0/0   | 1/1 | 1/1 | 0/1 | 1/1 | 1/1 | 1/1 | intergenic_       | MODIFIER          | NONE                |                  |                        | -1                | ENSSSCG00000009655-PPP2R2A |                    |                   | -1              |                 |
| 16     | 27256330  |    | C   | T   | 1007.81 |        | 138 | 1/1   | 0/0 | 0/1 | 0/1 | 1/1 | 1/1 | 1/1 | intron_vari       | MODIFIER          | NONE                | c.-23-263G>A     |                        | -1                | C6                         | protein_coding     | ENSSSCT01         | 2               |                 |

| Head            | Note                         |
|-----------------|------------------------------|
| #CHROM          | Chromosome                   |
| POS             | Position                     |
| ID              | Identification               |
| REF             | Reference seq (Sscrofa 10.2) |
| ALT             | Alternative sequence         |
| QUAL            | Quality                      |
| FILTER          |                              |
| DP              | Total depth                  |
| EFF[*].EFFE     | Genetic element              |
| EFF[*].JMP      | Functional annotation        |
| EFF[*].FUNCLASS |                              |
| EFF[*].CODON    |                              |
| EFF[*].AA       |                              |
| EFF[*].AA_LEN   |                              |
| EFF[*].GENE     |                              |
| EFF[*].BIOTYPE  |                              |
| EFF[*].CODING   |                              |
| EFF[*].TRID     |                              |
| EFF[*].RANK     |                              |
| .               | Not called                   |
| 0/0             | Homogeneous to REF           |
| 0/1             | Heterogeneous to REF         |
| 1/1             | Homogeneous to ALT           |
