# Supplementary material for: No excessive mutations in transcription activator-like effector nuclease-mediated α-1,3-galactosyltransferase knockout Yucatan miniature pigs
Source: PubMed Central journal article supplement (PMC6946973; doi:10.5713/ajas.19.0480), 2019-08-23
Supplement: ajas-19-0480-suppl2.pdf [file ajas-19-0480-suppl2.pdf]

Supplementary Table 2. Variant calls of TALEN-edited pig CB1

| #CHROM | POS       | ID | REF | ALT | QUAL    | FILTER | DP   | Donor | CJ1 | CB1 | CB3 | WT1 | WT2 | WT3 | EFF[*].EFF<br>ECT    | EFF[*].JMP<br>ACT | EFF[*].FU<br>NCLASS | EFF[*].CO<br>DON     | EFF[*].AA<br>LEN | EFF[*].AA_<br>LEN  | EFF[*].GENE    | EFF[*].BIO<br>TYPE         | EFF[*].CO<br>DING | EFF[*].TRI<br>D | EFF[*].RA<br>NK |
|--------|-----------|----|-----|-----|---------|--------|------|-------|-----|-----|-----|-----|-----|-----|----------------------|-------------------|---------------------|----------------------|------------------|--------------------|----------------|----------------------------|-------------------|-----------------|-----------------|
| 1      | 91512902  |    | T   | A   | 1472.75 |        | 101  | 1/1   | /.  | 0/0 | 1/1 | 1/1 | 1/1 | 1/1 | intergenic_MODIFIER  | NONE              |                     |                      |                  |                    | -1             | HS3T5-FRK                  |                   |                 | -1              |
| 2      | 100139787 |    | C   | A   | 1181.05 |        | 1467 | 1/1   | 1/1 | 0/0 | 0/1 | 1/1 | 1/1 | 1/1 | intron_vari_MODIFIER | NONE              |                     | c.38+3267C>A         |                  | ENSSSCG00000023484 | protein_coding |                            | ENSSSCT0:3        |                 |                 |
| 3      | 36315111  |    | A   | G   | 1089.21 |        | 132  | 1/1   | 0/1 | 0/0 | 1/1 | 1/1 | 0/1 | 1/1 | intergenic_MODIFIER  | NONE              |                     |                      |                  |                    | -1             | RBFOX1-U6                  |                   |                 | -1              |
| 6      | 81281307  |    | G   | GT  | 2735.98 |        | 183  | 0/0   | 0/1 | 1/1 | 1/1 | 0/1 | 0/1 | 1/1 | intron_vari_MODIFIER | NONE              |                     | c.820-502_820-501ins |                  | SDC3               | protein_coding |                            | ENSSSCT0:2        |                 |                 |
| 6      | 145141339 |    | C   | T   | 1024.87 |        | 151  | 1/1   | 0/0 | 0/0 | 1/1 | 1/1 | 0/1 | 1/1 | intergenic_MODIFIER  | NONE              |                     |                      |                  |                    | -1             | PPAP28-ENSSSCG00000024345  |                   |                 | -1              |
| 8      | 21945383  |    | A   | G   | 1116.71 |        | 139  | 0/0   | 0/1 | 1/1 | 1/1 | 1/1 | 0/1 | 1/1 | intergenic_MODIFIER  | NONE              |                     |                      |                  |                    | -1             | 7SK-ENSSSCG00000008763     |                   |                 | -1              |
| 8      | 21945384  |    | T   | C   | 1257.37 |        | 140  | 0/0   | 0/1 | 1/1 | 1/1 | 1/1 | 1/1 | 1/1 | intergenic_MODIFIER  | NONE              |                     |                      |                  |                    | -1             | 7SK-ENSSSCG00000008763     |                   |                 | -1              |
| 8      | 33762665  |    | GT  | G   | 1159.43 |        | 216  | 0/0   | 1/1 | 1/1 | 1/1 | 1/1 | 1/1 | 0/1 | intergenic_MODIFIER  | NONE              |                     |                      |                  |                    | -1             | NSUN7-U6                   |                   |                 | -1              |
| 14     | 11250816  |    | G   | T   | 1477.15 |        | 177  | 0/0   | 1/1 | 1/1 | 0/1 | 0/1 | 1/1 | 1/1 | intergenic_MODIFIER  | NONE              |                     |                      |                  |                    | -1             | ENSSSCG00000009655-PPP2R2A |                   |                 | -1              |
| 18     | 55245294  |    | T   | C   | 1405.56 |        | 122  | 0/0   | 0/1 | 1/1 | 0/0 | 0/1 | 1/1 | 1/1 | intron_vari_MODIFIER | NONE              |                     | c.273+8194A>G        |                  | CCM2               | protein_coding |                            | ENSSSCT0:3        |                 |                 |

| Head            | Note                         |
|-----------------|------------------------------|
| #CHROM          | Chromosome                   |
| POS             | Position                     |
| ID              | Identification               |
| REF             | Reference seq (Sscrofa 10.2) |
| ALT             | Alternative sequence         |
| QUAL            | Quality                      |
| FILTER          |                              |
| DP              | Total depth                  |
| EFF[*].EFFE     | Genetic element              |
| EFF[*].JMP      | Functional annotation        |
| EFF[*].FUNCLASS |                              |
| EFF[*].CODON    |                              |
| EFF[*].AA       |                              |
| EFF[*].AA_LEN   |                              |
| EFF[*].GENE     |                              |
| EFF[*].BIOTYPE  |                              |
| EFF[*].CODING   |                              |
| EFF[*].TRID     |                              |
| EFF[*].RANK     |                              |
| /.              | Not called                   |
| 0/0             | Homogeneous to REF           |
| 0/1             | Heterogeneous to REF         |
| 1/1             | Homogeneous to ALT           |
