# Supplementary material for: No excessive mutations in transcription activator-like effector nuclease-mediated α-1,3-galactosyltransferase knockout Yucatan miniature pigs
Source: PubMed Central journal article supplement (PMC6946973; doi:10.5713/ajas.19.0480), 2019-08-23
Supplement: ajas-19-0480-suppl4.pdf [file ajas-19-0480-suppl4.pdf]

Supplementary Table 4. Variant calls of wild type strain control WT1

| #CHROM | POS      | ID | REF  | ALT      | QUAL     | FILTER | DP  | Donor | CJ1 | CB1 | CB3 | WT1 | WT2 | WT3 | EFF[*].EFF<br>ECT         | EFF[*].JM<br>PACT         | EFF[*].FU<br>NCLASS | EFF[*].CO<br>DON     | EFF[*].AA<br>_LEN      | EFF[*].GE<br>NE                     | EFF[*].BIO<br>TYPE    | EFF[*].CO<br>DING | EFF[*].TRI<br>D | EFF[*].RA<br>NK | Head                         | Note |
|--------|----------|----|------|----------|----------|--------|-----|-------|-----|-----|-----|-----|-----|-----|---------------------------|---------------------------|---------------------|----------------------|------------------------|-------------------------------------|-----------------------|-------------------|-----------------|-----------------|------------------------------|------|
| 1      | 1.82E+08 |    | T    | C        | 4023.92  |        | 210 | 0/0   | 0/1 | 0/1 | 1/1 | 1/1 | 1/1 | 1/1 | intergenic, MODIFIER NONE |                           |                     |                      | -1                     | U2-DIS3L                            |                       |                   | -1              | #CHROM          | Chromosome                   |      |
| 1      | 1.9E+08  |    | A    | G        | 1167.65  |        | 122 | 0/0   | 1/1 | 0/1 | 1/1 | 1/1 | 1/1 | 1/1 | intergenic, MODIFIER NONE |                           |                     |                      | -1                     | 5S_rRNA-U6                          |                       |                   | -1              | POS             | Position                     |      |
| 1      | 12865248 |    | G    | A        | 1443.27  |        | 138 | 1/1   | 1/1 | 1/1 | 1/1 | 0/0 | 1/1 | 1/1 | intergenic, MODIFIER NONE |                           |                     |                      | -1                     | 5S_rRNA-TFB1M                       |                       |                   | -1              | ID              | Identification               |      |
| 1      | 12865258 |    | T    | C        | 1485.55  |        | 143 | 1/1   | 1/1 | 1/1 | 0/1 | 0/0 | 1/1 | 1/1 | intergenic, MODIFIER NONE |                           |                     |                      | -1                     | 5S_rRNA-TFB1M                       |                       |                   | -1              | REF             | Reference seq (Sscrofa 10.2) |      |
| 1      | 12865273 |    | G    | A        | 1686.78  |        | 146 | 1/1   | 1/1 | 1/1 | 1/1 | 0/1 | 0/0 | 1/1 | intergenic, MODIFIER NONE |                           |                     |                      | -1                     | 5S_rRNA-TFB1M                       |                       |                   | -1              | ALT             | Alternative sequence         |      |
| 1      | 13855875 |    | T    | A        | 1428.83  |        | 136 | 1/1   | 1/1 | 1/1 | 1/1 | 0/1 | 0/0 | 1/1 | intergenic, MODIFIER NONE |                           |                     |                      | -1                     | TIAM2-ENSSSCG00000026474            |                       |                   | -1              | QUAL            | Quality                      |      |
| 1      | 22077624 |    | T    | TTTTC    | 3371.45  |        | 204 | 1/1   | 0/1 | 0/1 | 0/1 | 0/0 | 0/1 | 0/1 | intron_vari MODIFIER NONE |                           | c.293-8837_293-8836 | -1                   | EPM2A                  | protein_coding                      | ENSSSCT0 1            |                   |                 | FILTER          |                              |      |
| 1      | 25325718 |    | C    | A        | 1375.51  |        | 171 | 1/1   | 1/1 | 1/1 | 0/1 | 0/0 | 1/1 | 0/1 | intron_vari MODIFIER NONE |                           | c.82+26877C>A       | -1                   | GPR126                 | protein_coding                      | ENSSSCT0 2            |                   |                 | DP              | Total depth                  |      |
| 1      | 26002169 |    | T    | C        | 1156.6   |        | 112 | 1/1   | 1/1 | 1/1 | 0/1 | 0/0 | 0/1 | 0/1 | intergenic, MODIFIER NONE |                           |                     |                      | -1                     | NMBR-ENSSSCG00000019021             |                       |                   | -1              | EFF[*].EFFE     | Genetic element              |      |
| 1      | 32321590 |    | AGAG | A        | 4273.41  |        | 211 | 1/1   | 1/1 | 1/1 | 0/1 | 0/0 | 1/1 | 0/1 | intergenic, MODIFIER NONE |                           |                     | n.null_nulldelGAG    | -1                     | MYB-HBS1L                           |                       |                   | -1              | EFF[*].JMP.     | Functional annotation        |      |
| 1      | 36919425 |    | CA   | C        | 4336.64  |        | 222 | 1/1   | 1/1 | 1/1 | 0/0 | 0/0 | 0/1 | 0/0 | intergenic, MODIFIER NONE |                           |                     |                      | -1                     | L3MBTL3-TMEM244                     |                       |                   | -1              | EFF[*].FUNCLASS |                              |      |
| 1      | 39516877 |    | C    | CA       | 3080.19  |        | 243 | 1/1   | 1/1 | 1/1 | 0/0 | 0/0 | 1/1 | 0/0 | intergenic, MODIFIER NONE |                           |                     | n.null_nullinsA      | -1                     | KIAA0408-ENSSSCG00000004216         |                       |                   | -1              | EFF[*].CODON    |                              |      |
| 1      | 57679142 |    | A    | G        | 1176.21  |        | 146 | 1/1   | 1/1 | 1/1 | 0/1 | 0/0 | 0/1 | 0/1 | intergenic, MODIFIER NONE |                           |                     |                      | -1                     | OGFRL1-ssc-mir-30c-2                |                       |                   | -1              | EFF[*].AA       |                              |      |
| 1      | 60007428 |    | A    | T        | 1046.24  |        | 167 | 1/1   | 1/1 | 1/1 | 0/1 | 0/0 | 0/1 | 0/1 | intergenic, MODIFIER NONE |                           |                     |                      | -1                     | CEP162-TBX18                        |                       |                   | -1              | EFF[*].AA_LEN   |                              |      |
| 1      | 69551945 |    | G    | GT       | 4114.4   |        | 234 | 1/1   | 1/1 | 1/1 | 1/1 | 0/0 | 0/0 | 1/1 | 0/1                       | intergenic, MODIFIER NONE |                     |                      | n.null_nullinsT        | -1                                  | ENSSSCG00000018695-U6 |                   |                 | -1              | EFF[*].GENE                  |      |
| 1      | 72866720 |    | T    | C        | 2092.71  |        | 154 | 1/1   | 1/1 | 1/1 | 0/1 | 0/0 | 1/1 | 1/1 | intergenic, MODIFIER NONE |                           |                     |                      | -1                     | 75K-ENSSSCG00000004345              |                       |                   | -1              | EFF[*].BIOTYPE  |                              |      |
| 1      | 72942927 |    | G    | A        | 1057.09  |        | 125 | 1/1   | 1/1 | 1/1 | 0/1 | 0/0 | 1/1 | 1/1 | intergenic, MODIFIER NONE |                           |                     |                      | -1                     | 75K-U6                              |                       |                   | -1              | EFF[*].CODING   |                              |      |
| 1      | 74956905 |    | T    | TGTGTGTC | 11354.34 |        | 207 | 1/1   | 1/1 | 1/1 | 0/1 | 0/0 | 1/1 | 0/1 | intergenic, MODIFIER NONE |                           |                     | n.null_nullinsGTGTGT | -1                     | ENSSSCG00000004348-ENSSSCG000000004 |                       |                   | -1              | EFF[*].TRID     |                              |      |
| 1      | 78454324 |    | C    | A        | 1217.68  |        | 149 | 1/1   | 1/1 | 1/1 | 0/1 | 0/0 | 1/1 | 0/1 | intergenic, MODIFIER NONE |                           |                     |                      | -1                     | GRIK2-HACE1                         |                       |                   | -1              | EFF[*].RANK     |                              |      |
| 1      | 78536625 |    | GT   | G        | 3973.33  |        | 227 | 1/1   | 1/1 | 1/1 | 0/1 | 0/0 | 1/1 | 0/1 | intergenic, MODIFIER NONE |                           |                     |                      | -1                     | GRIK2-HACE1                         |                       |                   | -1              | .               | Not called                   |      |
| 1      | 79646811 |    | GA   | G        | 3225.28  |        | 209 | 1/1   | 1/1 | 1/1 | 0/1 | 0/0 | 1/1 | 0/1 | intergenic, MODIFIER NONE |                           |                     |                      | -1                     | GRIK2-HACE1                         |                       |                   | -1              | 0/0             | Homogeneous to REF           |      |
| 1      | 80039756 |    | T    | C        | 1079.07  |        | 156 | 1/1   | 1/1 | 1/1 | 0/1 | 0/0 | 1/1 | 1/1 | intergenic, MODIFIER NONE |                           |                     |                      | -1                     | GRIK2-HACE1                         |                       |                   | -1              | 0/1             | Homogeneous to REF           |      |
| 1      | 81615492 |    | G    | A        | 1344.85  |        | 115 | 1/1   | 1/1 | 1/1 | 0/1 | 0/0 | 1/1 | 1/1 | intergenic, MODIFIER NONE |                           |                     |                      | -1                     | ENSSSCG00000004369-U6               |                       |                   | -1              | 1/1             | Homogeneous to ALT           |      |
| 1      | 87450249 |    | A    | G        | 2292.87  |        | 189 | 1/1   | 1/1 | 1/1 | 0/1 | 0/0 | 1/1 | 0/1 | intergenic, MODIFIER NONE |                           |                     |                      | -1                     | FYN-U6                              |                       |                   | -1              |                 |                              |      |
| 1      | 87750515 |    | T    | TTTTA    | 7274.94  |        | 233 | 1/1   | 1/1 | 1/1 | 0/1 | 0/0 | 1/1 | 0/1 | intron_vari MODIFIER NONE |                           | c.3765+357_3765+35  | -1                   | ENSSSCG protein_coding |                                     | ENSSSCT0 26           |                   |                 |                 |                              |      |
| 1      | 87807921 |    | A    | G        | 1303.78  |        | 138 | 1/1   | 1/1 | 1/1 | 0/1 | 0/0 | 1/1 | 0/1 | intron_vari MODIFIER NONE |                           | c.112+773T>C        | -1                   | ENSSSCG protein_coding |                                     | ENSSSCT0 1            |                   |                 |                 |                              |      |
| 1      | 1.37E+08 |    | A    | ACG      | 5570.43  |        | 214 | 1/1   | 1/1 | 1/1 | 0/1 | 0/0 | 1/1 | 0/0 | intergenic, MODIFIER NONE |                           |                     | n.null_nullinsCG     | -1                     | ENSSSCG00000004658-DUT              |                       |                   | -1              |                 |                              |      |
| 1      | 1.59E+08 |    | TTC  | T        | 2430.88  |        | 203 | 1/1   | 1/1 | 1/1 | 0/1 | 0/0 | 1/1 | 1/1 | intergenic, MODIFIER NONE |                           |                     |                      | -1                     | ENSSSCG00000004839-U6               |                       |                   | -1              |                 |                              |      |
| 1      | 1.61E+08 |    | T    | TA       | 5489.87  |        | 197 | 1/1   | 1/1 | 1/1 | 0/0 | 0/0 | 1/1 | 1/1 | upstream, MODIFIER NONE   |                           |                     | n.-1_-1insT          | -1                     | ENSSSCG mirRNA                      |                       | ENSSSCT0 -1       |                 |                 |                              |      |
| 1      | 1.61E+08 |    | T    | TA       | 5489.87  |        | 197 | 1/1   | 1/1 | 1/1 | 0/0 | 0/0 | 1/1 | 1/1 | intergenic, MODIFIER NONE |                           |                     |                      | -1                     | ENSSSCG00000025864-ENSSSCG000000004 |                       |                   | -1              |                 |                              |      |
| 1      | 2.45E+08 |    | C    | T        | 1198.84  |        | 170 | 1/1   | 1/1 | 1/1 | 0/1 | 0/0 | 1/1 | 1/1 | intergenic, MODIFIER NONE |                           |                     |                      | -1                     | ENSSSCG00000005227-KCNV2            |                       |                   | -1              |                 |                              |      |
| 1      | 2.47E+08 |    | T    | C        | 1286.07  |        | 130 | 1/1   | 1/1 | .   | 0/1 | 0/0 | 1/1 | 1/1 | intergenic, MODIFIER NONE |                           |                     |                      | -1                     | U6-U6                               |                       |                   | -1              |                 |                              |      |
| 1      | 2.66E+08 |    | C    | T        | 6974.13  |        | 355 | 1/1   | 1/1 | 1/1 | 0/0 | 0/0 | 1/1 | 1/1 | intron_vari MODIFIER NONE |                           | c.-7+18761G>A       | -1                   | ENSSSCG protein_coding |                                     | ENSSSCT0 2            |                   |                 |                 |                              |      |
| 1      | 2.72E+08 |    | C    | T        | 1895.63  |        | 180 | 1/1   | 1/1 | 1/1 | 0/1 | 0/0 | 1/1 | 1/1 | intron_vari MODIFIER NONE |                           | c.2358+11721G>A     | -1                   | GRIN3A                 | protein_coding                      | ENSSSCT0 12           |                   |                 |                 |                              |      |
| 1      | 2.72E+08 |    | T    | C        | 1057.34  |        | 159 | 1/1   | 1/1 | 1/1 | 0/1 | 0/0 | 1/1 | 1/1 | intron_vari MODIFIER NONE |                           | c.699+6301A>G       | -1                   | GRIN3A                 | protein_coding                      | ENSSSCT0 1            |                   |                 |                 |                              |      |
| 1      | 2.74E+08 |    | G    | T        | 1597.54  |        | 144 | 1/1   | 1/1 | 1/1 | 0/1 | 0/0 | 1/1 | 1/1 | intergenic, MODIFIER NONE |                           |                     |                      | -1                     | CYL2-ENSSSCG00000005403             |                       |                   | -1              |                 |                              |      |
| 1      | 2.74E+08 |    | G    | A        | 1445.8   |        | 160 | 1/1   | 1/1 | 1/1 | 0/1 | 0/0 | 1/1 | 1/1 | intergenic, MODIFIER NONE |                           |                     |                      | -1                     | CYL2-ENSSSCG00000005403             |                       |                   | -1              |                 |                              |      |
| 1      | 2.87E+08 |    | A    | G        | 1093.03  |        | 144 | 1/1   | 1/1 | 1/1 | 0/1 | 0/0 | 1/1 | 1/1 | intergenic, MODIFIER NONE |                           |                     |                      | -1                     | ENSSSCG00000026492-ENSSSCG000000025 |                       |                   | -1              |                 |                              |      |
| 1      | 2.88E+08 |    | G    | A        | 1040.03  |        | 127 | 1/1   | 1/1 | 1/1 | 0/1 | 0/0 | 0/1 | 1/1 | intergenic, MODIFIER NONE |                           |                     |                      | -1                     | ENSSSCG00000005494-PAPPA            |                       |                   | -1              |                 |                              |      |
| 1      | 2.88E+08 |    | G    | A        | 1034.03  |        | 146 | 1/1   | 1/1 | 1/1 | 0/0 | 0/0 | 1/1 | 1/1 | intron_vari MODIFIER NONE |                           | c.3154-8075G>A      | -1                   | PAPPA                  | protein_coding                      | ENSSSCT0 11           |                   |                 |                 |                              |      |
| 1      | 2.89E+08 |    | T    | C        | 1382.87  |        | 166 | 1/1   | 1/1 | 1/1 | 0/1 | 0/0 | 1/1 | 1/1 | intron_vari MODIFIER NONE |                           | c.545+71578A>G      | -1                   | ENSSSCG protein_coding |                                     | ENSSSCT0 6            |                   |                 |                 |                              |      |
| 2      | 8371729  |    | CCA  | C        | 1468.89  |        | 210 | 0/0   | 0/1 | 0/1 | 1/1 | 1/1 | 1/1 | 0/1 | intergenic, MODIFIER NONE |                           |                     | n.null_nulldelCA     | -1                     | ZBTB3-TTC9C                         |                       |                   | -1              |                 |                              |      |
| 2      | 14567383 |    | A    | G        | 1578.91  |        | 135 | 0/0   | 0/0 | 0/0 | 1/1 | 1/1 | .   | 1/1 | intergenic, MODIFIER NONE |                           |                     |                      | -1                     | ENSSSCG00000024728-ENSSSCG000000014 |                       |                   | -1              |                 |                              |      |
| 2      | 19127176 |    | CT   | C        | 3059.78  |        | 258 | 0/0   | 0/0 | 0/0 | 1/1 | 1/1 | 1/1 | 0/1 | intergenic, MODIFIER NONE |                           |                     |                      | -1                     | TSPAN18-CD82                        |                       |                   | -1              |                 |                              |      |
| 2      | 61572733 |    | C    | G        | 1036.06  |        | 132 | 1/1   | 1/1 | 1/1 | 0/1 | 0/0 | 0/1 | 1/1 | upstream, MODIFIER NONE   |                           | c.-70G>C            | -1                   | PGLYRP2                | protein_coding                      | ENSSSCT0 -1           |                   |                 |                 |                              |      |
| 2      | 61572733 |    | C    | G        | 1036.06  |        | 132 | 1/1   | 1/1 | 1/1 | 0/1 | 0/0 | 0/1 | 1/1 | intergenic, MODIFIER NONE |                           |                     |                      | -1                     | PGLYRP2-CYP4F22                     |                       |                   | -1              |                 |                              |      |
| 2      | 63077973 |    | G    | T        | 1013.9   |        | 161 | 1/1   | 1/1 | 1/1 | 0/1 | 0/0 | 0/0 | 1/1 | intergenic, MODIFIER NONE |                           |                     |                      | -1                     | ENSSSCG00000013810-ENSSSCG000000013 |                       |                   | -1              |                 |                              |      |
| 2      | 63293848 |    | T    | TAC      | 3602.46  |        | 240 | 1/1   | 1/1 | 1/1 | 0/1 | 0/0 | 0/1 | 1/1 | intergenic, MODIFIER NONE |                           |                     | n.null_nullinsAC     | -1                     | ENSSSCG00000013809-ENSSSCG000000013 |                       |                   | -1              |                 |                              |      |
| 2      | 67265991 |    | AT   | A        | 3801.14  |        | 236 | 1/1   | 1/1 | 1/1 | 0/0 | 0/0 | 0/1 | 1/1 | 3_prime_U MODIFIER NONE   |                           | c.*243delT          | -1                   | ENSSSCG protein_coding |                                     | ENSSSCT0 5            |                   |                 |                 |                              |      |
| 2      | 72366396 |    | C    | G        | 1234.45  |        | 139 | 1/1   | 1/1 | 1/1 | 0/1 | 0/0 | 0/1 | 1/1 | intergenic, MODIFIER NONE |                           |                     |                      | -1                     | ENSSSCG00000013566-INSR             |                       |                   | -1              |                 |                              |      |
| 2      | 85064375 |    | G    | T        | 1029.62  |        | 151 | 1/1   | 1/1 | 1/1 | 0/1 | 0/0 | 0/1 | 1/1 | intergenic, MODIFIER NONE |                           |                     |                      | -1                     | ENSSSCG00000024586-ENC1             |                       |                   | -1              |                 |                              |      |
| 2      | 1.22E+08 |    | A    | AT       | 2147.06  |        | 211 | 1/1   | 1/1 | 1/1 | 0/1 | 0/0 | 1/1 | 1/1 | intergenic, MODIFIER NONE |                           |                     | n.null_nullinsT      | -1                     | ENSSSCG00000024866-ENSSSCG000000014 |                       |                   | -1              |                 |                              |      |
| 2      | 1.23E+08 |    | G    | A        | 1870.51  |        | 154 | 1/1   | 1/1 | 1/1 | 0/1 | 0/0 | 1/1 | 1/1 | intergenic, MODIFIER NONE |                           |                     |                      | -1                     | ENSSSCG00000014212-KCNN2            |                       |                   | -1              |                 |                              |      |
| 2      | 1.23E+08 |    | T    | C        | 1892.5   |        | 147 | 1/1   | 1/1 | 1/1 | 0/1 | 0/0 | 1/1 | 1/1 | intergenic, MODIFIER NONE |                           |                     |                      | -1                     | ENSSSCG00000014212-KCNN2            |                       |                   | -1              |                 |                              |      |
| 2      | 1.24E+08 |    | C    | A        | 1092.28  |        | 158 | 1/1   | 1/1 | 1/1 | 0/1 | 0/0 | 1/1 | 1/1 | intergenic, MODIFIER NONE |                           |                     |                      | -1                     | KCNN2-TRIM36                        |                       |                   | -1              |                 |                              |      |
| 2      | 1.24E+08 |    | T    | C        | 1017.48  |        | 163 | 1/1   | 1/1 | 1/1 | 0/1 | 0/0 | 1/1 | 1/1 | intergenic, MODIFIER NONE |                           |                     |                      | -1                     | KCNN2-TRIM36                        |                       |                   | -1              |                 |                              |      |
| 2      | 1.41E+08 |    | A    | G        | 1608.77  |        | 120 | 1/1   | 1/1 | 1/1 | 0/1 | 0/0 | 1/1 | 1/1 | intergenic, MODIFIER NONE |                           |                     |                      | -1                     | ENSSSCG00000014294-ENSSSCG000000030 |                       |                   | -1              |                 |                              |      |
| 2      | 1.41E+08 |    | G    | GA       | 2572.21  |        | 238 | 1/1   | 1/1 | 1/1 | 0/1 | 0/0 | 0/1 | 1/1 | intergenic, MODIFIER NONE |                           |                     | n.null_nullinsA      | -1                     | ENSSSCG00000030689-C5orf15          |                       |                   | -1              |                 |                              |      |
| 2      | 1.42E+08 |    | CA   | C        | 3687.55  |        | 188 | 1/1   | 1/1 | 1/1 | 0/1 | 0/0 | 1/1 | 1/1 | intergenic, MODIFIER NONE |                           |                     |                      | -1                     | ENSSSCG00000030689-C5orf15          |                       |                   | -1              |                 |                              |      |
| 2      | 1.43E+08 |    | C    | T        | 1438     |        | 125 | 1/1   | 1/1 | 1/1 | 0/1 | 0/0 | 1/1 | 1/1 | intergenic, MODIFIER NONE |                           |                     |                      | -1                     | H2AFY-ENSSSCG00000014309            |                       |                   | -1              |                 |                              |      |
| 2      | 1.43E+08 |    | T    | C        | 1227.13  |        | 122 | 1/1   | 1/1 | 1/1 | 0/1 | 0/0 | 1/1 | 1/1 | intergenic, MODIFIER NONE |                           |                     |                      | -1                     | H2AFY-ENSSSCG00000014309            |                       |                   | -1              |                 |                              |      |
| 2      | 1.43E+08 |    | C    | T        | 1209.97  |        | 178 | 1/1   | 1/1 | 1/1 | 0/1 | 0/0 | 1/1 | 1/1 | intergenic,               |                           |                     |                      |                        |                                     |                       |                   |                 |                 |                              |      |

|   |          |      |    |         |      |     |     |     |     |     |     |     |                           |                           |                   |                                       |             |    |
|---|----------|------|----|---------|------|-----|-----|-----|-----|-----|-----|-----|---------------------------|---------------------------|-------------------|---------------------------------------|-------------|----|
| 2 | 1.43E+08 | A    | G  | 1980.89 | 172  | 1/1 | 1/1 | 1/1 | 0/1 | 0/0 | 1/1 | 1/1 | intergenic, MODIFIER NONE |                           | -1                | H2AFY-ENSSSCG00000014309              | -1          |    |
| 2 | 1.43E+08 | G    | A  | 1673.21 | 181  | 1/1 | 1/1 | 1/1 | 0/1 | 0/0 | 1/1 | 1/1 | intergenic, MODIFIER NONE |                           | -1                | H2AFY-ENSSSCG00000014309              | -1          |    |
| 2 | 1.43E+08 | G    | C  | 1135.82 | 168  | 1/1 | 1/1 | 1/1 | 0/1 | 0/0 | 1/1 | 1/1 | intergenic, MODIFIER NONE |                           | -1                | H2AFY-ENSSSCG00000014309              | -1          |    |
| 2 | 1.5E+08  | GGAA | G  | 4881.88 | 196  | 1/1 | 1/1 | 1/1 | 1/1 | 0/1 | 0/0 | 1/1 | 0/1                       | intergenic, MODIFIER NONE | n.null_nulldelGAA | -1                                    | U5-FGF1     | -1 |
| 2 | 1.56E+08 | GT   | G  | 3315.31 | 211  | 1/1 | 1/1 | 1/1 | 0/0 | 0/0 | 1/1 | 1/1 | intergenic, MODIFIER NONE |                           | -1                | SPINK6-ENSSSCG00000030055             | -1          |    |
| 2 | 1.58E+08 | C    | CA | 2574.2  | 234  | 1/1 | 1/1 | 1/1 | 0/1 | 0/0 | 0/1 | 0/1 | intergenic, MODIFIER NONE | n.null_nullinsA           | -1                | ARHGEF37-ssc-mir-378-1                | -1          |    |
| 2 | 1.62E+08 | T    | C  | 1135.86 | 145  | 1/1 | 1/1 | 1/1 | 0/1 | 0/0 | 0/1 | 1/1 | intron_vari MODIFIER NONE | c.207-182A>G              | -1                | ENSSSCG protein_coding                | ENSSSCT0 3  |    |
| 3 | 25213842 | G    | A  | 1519.45 | 174  | 0/0 | 0/1 | 0/1 | 1/1 | 1/1 | 0/1 | 1/1 | intergenic, MODIFIER NONE |                           | -1                | ENSSSCG00000007847-ENSSSCG000000007   | -1          |    |
| 3 | 27990223 | G    | A  | 1259.01 | 155  | 0/0 | 0/1 | 0/1 | 1/1 | 1/1 | 0/1 | 1/1 | intergenic, MODIFIER NONE |                           | -1                | ENSSSCG00000007872-5S_rRNA            | -1          |    |
| 3 | 29467453 | G    | A  | 1111.54 | 208  | 0/0 | 0/1 | 0/1 | 1/1 | 1/1 | 0/1 | 1/1 | intron_vari MODIFIER NONE | c.289+10436G>A            | -1                | CPPED1 protein_coding                 | ENSSSCT0 2  |    |
| 3 | 32430658 | C    | A  | 1259.52 | 132  | 0/0 | 0/1 | 0/1 | 1/1 | 1/1 | 0/1 | 1/1 | intergenic, MODIFIER NONE |                           | -1                | LITAF-ENSSSCG00000028743              | -1          |    |
| 3 | 33134141 | C    | T  | 1105.93 | 145  | 0/0 | 1/1 | 0/1 | 1/1 | 1/1 | 0/1 | 1/1 | intron_vari MODIFIER NONE | c.376+331C>T              | -1                | ENSSSCG protein_coding                | ENSSSCT0 5  |    |
| 3 | 52550229 | T    | C  | 1559.23 | 143  | 0/0 | 0/1 | 0/1 | 1/1 | 1/1 | 1/1 | 0/1 | intergenic, MODIFIER NONE |                           | -1                | MRPS9-ENSSSCG00000026126              | -1          |    |
| 3 | 52550244 | T    | C  | 1518.25 | 143  | 0/0 | 0/1 | 0/1 | 1/1 | 1/1 | 1/1 | 0/1 | intergenic, MODIFIER NONE |                           | -1                | MRPS9-ENSSSCG00000026126              | -1          |    |
| 3 | 54769594 | A    | G  | 1046.19 | 168  | 0/0 | 0/1 | 0/1 | 1/1 | 1/1 | 1/1 | 0/1 | intergenic, MODIFIER NONE |                           | -1                | IL1R1-ENSSSCG00000028331              | -1          |    |
| 3 | 55829690 | T    | C  | 1156.22 | 161  | 0/0 | 0/1 | 0/1 | 1/1 | 1/1 | 1/1 | 0/1 | intron_vari MODIFIER NONE | c.*33+6539A>G             | -1                | RPL31 protein_coding                  | ENSSSCT0 4  |    |
| 3 | 55829690 | T    | C  | 1156.22 | 161  | 0/0 | 0/1 | 0/1 | 1/1 | 1/1 | 1/1 | 0/1 | intron_vari MODIFIER NONE | c.2549-2990T>C            | -1                | TBC1D8 protein_coding                 | ENSSSCT0 15 |    |
| 3 | 1.39E+08 | C    | T  | 1163.73 | 148  | 0/0 | 0/1 | 0/1 | 1/1 | 1/1 | 0/1 | 1/1 | intergenic, MODIFIER NONE |                           | -1                | ENSSSCG00000025247-ASGR1              | -1          |    |
| 3 | 4732833  | AGG  | A  | 3342.11 | 211  | 1/1 | 1/1 | 1/1 | 0/1 | 0/0 | 1/1 | 1/1 | upstream, MODIFIER NONE   | c.-88_-88delCC            | -1                | BETA-ACT1 protein_coding              | ENSSSCT0 -1 |    |
| 3 | 4732833  | AGG  | A  | 3342.11 | 211  | 1/1 | 1/1 | 1/1 | 0/1 | 0/0 | 1/1 | 1/1 | intergenic, MODIFIER NONE | n.null_nulldelGG          | -1                | BETA-ACTIN-ENSSSCG00000007586         | -1          |    |
| 3 | 18714107 | C    | CA | 1444.76 | 201  | 1/1 | 1/1 | 1/1 | 0/1 | 0/0 | 0/1 | 0/1 | upstream, MODIFIER NONE   | c.-309_-309insT           | -1                | TUFM protein_coding                   | ENSSSCT0 -1 |    |
| 3 | 18714107 | C    | CA | 1444.76 | 201  | 1/1 | 1/1 | 1/1 | 0/1 | 0/0 | 0/1 | 0/1 | upstream, MODIFIER NONE   | c.-795_-795insA           | -1                | SH2B1 protein_coding                  | ENSSSCT0 -1 |    |
| 3 | 18714107 | C    | CA | 1444.76 | 201  | 1/1 | 1/1 | 1/1 | 0/1 | 0/0 | 0/1 | 0/1 | intergenic, MODIFIER NONE | n.null_nullinsA           | -1                | TUFM-SH2B1                            | -1          |    |
| 3 | 1.38E+08 | A    | G  | 3281.05 | 164  | 1/1 | 1/1 | 1/1 | 0/1 | 0/0 | 1/1 | 1/1 | intergenic, MODIFIER NONE |                           | -1                | CMPK2-U6                              | -1          |    |
| 3 | 1.38E+08 | C    | T  | 2352.53 | 123  | 1/1 | 1/1 | 1/1 | 0/1 | 0/0 | 1/1 | 1/1 | intergenic, MODIFIER NONE |                           | -1                | CMPK2-U6                              | -1          |    |
| 3 | 1.38E+08 | A    | G  | 2109.53 | 115  | 1/1 | 1/1 | 1/1 | 0/1 | 0/0 | 1/1 | 1/1 | intergenic, MODIFIER NONE |                           | -1                | CMPK2-U6                              | -1          |    |
| 3 | 1.38E+08 | A    | G  | 2083.53 | 115  | 1/1 | 1/1 | 1/1 | 0/1 | 0/0 | 1/1 | 1/1 | intergenic, MODIFIER NONE |                           | -1                | CMPK2-U6                              | -1          |    |
| 3 | 1.38E+08 | C    | G  | 2113.33 | 116  | 1/1 | 1/1 | 1/1 | 0/1 | 0/0 | 1/1 | 1/1 | intergenic, MODIFIER NONE |                           | -1                | CMPK2-U6                              | -1          |    |
| 3 | 1.38E+08 | T    | A  | 2020.54 | 116  | 1/1 | 1/1 | 1/1 | 0/1 | 0/0 | 1/1 | 1/1 | intergenic, MODIFIER NONE |                           | -1                | CMPK2-U6                              | -1          |    |
| 3 | 1.38E+08 | C    | G  | 2051.33 | 116  | 1/1 | 1/1 | 1/1 | 0/1 | 0/0 | 1/1 | 1/1 | intergenic, MODIFIER NONE |                           | -1                | CMPK2-U6                              | -1          |    |
| 3 | 1.38E+08 | T    | A  | 3692.8  | 192  | 1/1 | 1/1 | 1/1 | 0/1 | 0/0 | 1/1 | 1/1 | intergenic, MODIFIER NONE |                           | -1                | CMPK2-U6                              | -1          |    |
| 3 | 1.38E+08 | T    | A  | 3595.05 | 191  | 1/1 | 1/1 | 1/1 | 0/1 | 0/0 | 1/1 | 1/1 | intergenic, MODIFIER NONE |                           | -1                | CMPK2-U6                              | -1          |    |
| 4 | 4068921  | T    | TG | 1661.78 | 218  | 0/0 | 0/1 | 0/1 | 1/1 | 1/1 | 1/1 | 1/1 | intergenic, MODIFIER NONE | n.null_nullinsG           | -1                | ENSSSCG00000005938-5S_rRNA            | -1          |    |
| 4 | 9068490  | T    | C  | 1288.22 | 135  | 0/0 | 0/1 | 0/1 | 1/1 | 1/1 | 0/1 | 1/1 | intron_vari MODIFIER NONE | c.169+46T>C               | -1                | OC90 protein_coding                   | ENSSSCT0 2  |    |
| 4 | 9068533  | C    | G  | 1109.13 | 130  | 0/0 | 0/1 | 0/1 | 1/1 | 1/1 | 0/1 | 1/1 | intron_vari MODIFIER NONE | c.169+89C>G               | -1                | OC90 protein_coding                   | ENSSSCT0 2  |    |
| 4 | 9084210  | T    | C  | 1281.3  | 160  | 0/0 | 0/1 | 0/1 | 1/1 | 1/1 | 0/1 | 1/1 | intron_vari MODIFIER NONE | c.1070+848T>C             | -1                | OC90 protein_coding                   | ENSSSCT0 12 |    |
| 4 | 9086006  | T    | C  | 1388.05 | 212  | 0/0 | 0/1 | 0/1 | 1/1 | 1/1 | 0/1 | 1/1 | intron_vari MODIFIER NONE | c.1071-180T>C             | -1                | OC90 protein_coding                   | ENSSSCT0 12 |    |
| 4 | 67994103 | TTG  | T  | 1837.94 | 214  | 0/0 | 0/0 | 0/1 | 1/1 | 1/1 | 0/1 | 1/1 | intron_vari MODIFIER NONE | c.814+7317_814+731        | -1                | STAU2 protein_coding                  | ENSSSCT0 6  |    |
| 4 | 74051994 | T    | C  | 1357.71 | 165  | 0/0 | 0/1 | 0/1 | 1/1 | 1/1 | 1/1 | 1/1 | intergenic, MODIFIER NONE |                           | -1                | ENSSSCG0000006206-ENSSSCG000000023    | -1          |    |
| 4 | 74052001 | T    | C  | 1158.98 | 164  | 0/0 | 0/1 | 0/1 | 1/1 | 1/1 | 1/1 | 1/1 | intergenic, MODIFIER NONE |                           | -1                | ENSSSCG00000006206-ENSSSCG000000023   | -1          |    |
| 4 | 84082675 | GA   | G  | 3538.89 | 265  | 0/0 | 0/0 | 0/1 | 1/1 | 1/1 | 1/1 | 1/1 | intergenic, MODIFIER NONE |                           | -1                | SOX17-MRPL15                          | -1          |    |
| 4 | 86371133 | A    | G  | 1238.81 | 164  | 0/0 | 0/1 | 0/1 | 1/1 | 1/1 | 1/1 | 1/1 | intergenic, MODIFIER NONE |                           | -1                | PCMTD1-SNAI2                          | -1          |    |
| 4 | 20791412 | T    | TC | 3077.48 | 247  | 1/1 | 1/1 | 1/1 | 0/1 | 0/0 | 0/1 | 1/1 | intron_vari MODIFIER NONE | c.149-4470_149-4469       | -1                | ENSSSCG protein_coding                | ENSSSCT0 1  |    |
| 4 | 60432696 | C    | T  | 1585.69 | 157  | 1/1 | 1/1 | 1/1 | 0/1 | 0/0 | 1/1 | 1/1 | intergenic, MODIFIER NONE |                           | -1                | FABP5-PAG1                            | -1          |    |
| 4 | 1.34E+08 | G    | GA | 1278.25 | 166  | 1/1 | 1/1 | 1/1 | 0/1 | 0/0 | 1/1 | 1/1 | intergenic, MODIFIER NONE | n.null_nullinsA           | -1                | 75K-RWDD3                             | -1          |    |
| 5 | 9089370  | C    | CT | 2230.04 | 216  | 0/0 | 0/0 | 0/0 | 1/1 | 1/1 | 1/1 | 1/1 | intron_vari MODIFIER NONE | c.3101-81_3101-80in       | -1                | MYH9 protein_coding                   | ENSSSCT0 24 |    |
| 5 | 27974160 | A    | G  | 1202.27 | 146  | 0/0 | 0/1 | 0/1 | 1/1 | 1/1 | 0/1 | 1/1 | intergenic, MODIFIER NONE |                           | -1                | U6-ENSSSCG00000000457                 | -1          |    |
| 5 | 69132974 | GA   | G  | 2087.8  | 234  | 0/0 | 0/0 | 0/1 | 1/1 | 1/1 | 0/1 | 1/1 | intergenic, MODIFIER NONE |                           | -1                | PRMT8-ENSSSCG00000000734              | -1          |    |
| 5 | 30837776 | A    | T  | 1709    | 151  | 1/1 | 1/1 | 1/1 | 0/1 | 0/1 | 1/1 | 0/1 | intergenic, MODIFIER NONE |                           | -1                | ENSSSCG000000024879-ENSSSCG0000000000 | -1          |    |
| 5 | 33390843 | G    | A  | 1125.89 | 135  | 1/1 | 1/1 | 1/1 | 0/1 | 0/0 | 1/1 | 0/1 | intron_vari MODIFIER NONE | c.249+1087G>A             | -1                | HMG2A protein_coding                  | ENSSSCT0 3  |    |
| 5 | 38824938 | G    | A  | 1083.32 | 179  | 1/1 | 1/1 | 1/1 | 0/1 | 0/0 | 1/1 | 0/1 | intergenic, MODIFIER NONE |                           | -1                | TPH2-TRH-DE                           | -1          |    |
| 5 | 41628912 | C    | T  | 1768.76 | 190  | 1/1 | 1/1 | 1/1 | 0/1 | 0/0 | 1/1 | 0/1 | intergenic, MODIFIER NONE |                           | -1                | ATXN7L3B-KCNC2                        | -1          |    |
| 5 | 65897789 | C    | T  | 1904.49 | 169  | 1/1 | 1/1 | 1/1 | 0/1 | 0/0 | 1/1 | 0/1 | upstream, MODIFIER NONE   | c.-324C>T                 | -1                | ENSSSCG protein_coding                | ENSSSCT0 -1 |    |
| 5 | 65897789 | C    | T  | 1904.49 | 169  | 1/1 | 1/1 | 1/1 | 0/1 | 0/0 | 1/1 | 0/1 | intergenic, MODIFIER NONE |                           | -1                | SLC2A3-RBP5                           | -1          |    |
| 5 | 65897877 | A    | G  | 1231.62 | 178  | 1/1 | 1/1 | 1/1 | 0/1 | 0/0 | 1/1 | 0/1 | upstream, MODIFIER NONE   | c.-324A>G                 | -1                | ENSSSCG protein_coding                | ENSSSCT0 -1 |    |
| 5 | 65897877 | A    | G  | 1231.62 | 178  | 1/1 | 1/1 | 1/1 | 0/1 | 0/0 | 1/1 | 0/1 | intergenic, MODIFIER NONE |                           | -1                | SLC2A3-RBP5                           | -1          |    |
| 5 | 67490871 | G    | GA | 3401.17 | 233  | 1/1 | 1/1 | 1/1 | 0/0 | 0/0 | 1/1 | 0/0 | intergenic, MODIFIER NONE | n.null_nullinsCA          | -1                | ANO2-KVL5                             | -1          |    |
| 6 | 2338761  | T    | C  | 1084.1  | 129  | 0/0 | 0/1 | 0/1 | 1/1 | 1/1 | 1/1 | 0/1 | intergenic, MODIFIER NONE |                           | -1                | C16orf95-FOXL1                        | -1          |    |
| 6 | 3432569  | C    | G  | 1130.18 | 137  | 0/0 | 0/1 | 0/1 | 1/1 | 1/1 | 1/1 | 0/1 | intergenic, MODIFIER NONE |                           | -1                | MTHFSD-COX41                          | -1          |    |
| 6 | 17071811 | A    | C  | 1049.52 | 1905 | 0/0 | 0/1 | 0/1 | 1/1 | 1/1 | 1/1 | 1/1 | intergenic, MODIFIER NONE |                           | -1                | CDH3-RSPRY1                           | -1          |    |
| 6 | 29037648 | A    | G  | 1211.43 | 115  | 0/0 | 0/1 | 0/1 | 1/1 | 1/1 | 1/1 | 1/1 | intergenic, MODIFIER NONE |                           | -1                | ENSSSCG00000002834-TOX3               | -1          |    |
| 6 | 31093904 | A    | G  | 1081.53 | 127  | 0/0 | 0/1 | 0/1 | 1/1 | 1/1 | 1/1 | 1/1 | intergenic, MODIFIER NONE |                           | -1                | ZNF423-N4BP1                          | -1          |    |
| 6 | 59974516 | T    | C  | 1514.54 | 134  | 0/0 | 0/1 | 0/1 | 1/1 | 1/1 | 1/1 | 1/1 | intergenic, MODIFIER NONE |                           | -1                | ENSSSCG00000003361-C1orf174           | -1          |    |
| 6 | 75048956 | T    | C  | 1056.88 | 139  | 0/0 | 0/1 | 0/1 | 1/1 | 1/1 | 0/1 | 1/1 | intron_vari MODIFIER NONE | c.1405-11327T>C           | -1                | KDM1A protein_coding                  | ENSSSCT0 11 |    |
| 6 | 12326306 | C    | T  | 1793.25 | 182  | 1/1 | 1/1 | 1/1 | 0/1 | 0/0 | 0/1 | 1/1 | intergenic, MODIFIER NONE |                           | -1                | LHDH-ZFP1                             | -1          |    |
| 6 | 52852324 | A    | G  | 1564.53 | 96   | 1/1 | 1/1 | 1/1 | 0/1 | 0/0 | 1/1 | 0/1 | intergenic, MODIFIER NONE |                           | -1                | ENSSSCG00000003252-ENSSSCG000000003   | -1          |    |
| 6 | 60387399 | G    | T  | 1149.24 | 150  | 1/1 | 1/1 | 1/1 | 0/1 | 0/0 | 1/1 | 0/1 | intergenic, MODIFIER NONE |                           | -1                | DFFB-NPHP4                            | -1          |    |

|    |          |      |     |         |     |     |     |     |     |     |     |     |                           |                     |                                      |             |
|----|----------|------|-----|---------|-----|-----|-----|-----|-----|-----|-----|-----|---------------------------|---------------------|--------------------------------------|-------------|
| 6  | 61355577 | A    | C   | 1328.21 | 135 | 1/1 | 1/1 | 1/1 | 0/1 | 0/0 | 1/1 | 0/1 | intergenic, MODIFIER NONE | -1                  | DFFB-NHPH4                           | -1          |
| 6  | 91356011 | A    | G   | 1204.48 | 142 | 1/1 | 1/1 | 1/1 | 0/1 | 0/0 | 1/1 | 0/1 | intergenic, MODIFIER NONE | -1                  | ENSSSCG00000024963-ENSSSCG000000003  | -1          |
| 6  | 1.2E+08  | G    | A   | 1308.65 | 170 | 1/1 | 1/1 | 1/1 | 0/1 | 0/0 | 1/1 | 1/1 | intergenic, MODIFIER NONE | -1                  | ENSSSCG000000026170-U6               | -1          |
| 6  | 1.24E+08 | T    | G   | 2316.1  | 178 | 1/1 | 1/1 | 1/1 | 0/1 | 0/0 | 1/1 | 1/1 | intergenic, MODIFIER NONE | -1                  | U1-ELTD1                             | -1          |
| 6  | 1.24E+08 | T    | A   | 1941.49 | 146 | 1/1 | 1/1 | 1/1 | 0/1 | 0/0 | 1/1 | 1/1 | intergenic, MODIFIER NONE | -1                  | U1-ELTD1                             | -1          |
| 7  | 40876991 | C    | T   | 1149.98 | 119 | 1/1 | 1/1 | 1/1 | 0/1 | 0/0 | 1/1 | 0/1 | intergenic, MODIFIER NONE | -1                  | ENSSSCG00000019053-LRFN2             | -1          |
| 7  | 41560388 | G    | C   | 1341.28 | 153 | 1/1 | 1/1 | 1/1 | 0/1 | 0/0 | 0/1 | 0/1 | intergenic, MODIFIER NONE | -1                  | ENSSSCG00000026127-ENSSSCG000000027  | -1          |
| 7  | 44077767 | C    | T   | 1121.94 | 157 | 1/1 | 1/1 | 1/1 | 0/1 | 0/0 | 0/1 | 1/1 | intron_vari MODIFIER NONE | c.100-106C>T        | ENSSSCG protein_coding               | ENSSSCT0 1  |
| 7  | 51780524 | T    | C   | 1465.8  | 128 | 1/1 | 1/1 | 1/1 | 0/1 | 0/0 | 0/1 | 1/1 | intergenic, MODIFIER NONE | -1                  | ENSSSCG00000025535-ENSSSCG000000001  | -1          |
| 7  | 51780537 | G    | A   | 1255.87 | 122 | 1/1 | 1/1 | 1/1 | 0/1 | 0/0 | 0/1 | 1/1 | intergenic, MODIFIER NONE | -1                  | ENSSSCG00000025535-ENSSSCG000000001  | -1          |
| 7  | 57883231 | C    | T   | 2008.36 | 140 | 1/1 | 1/1 | 1/1 | 0/1 | 0/0 | 1/1 | 1/1 | intergenic, MODIFIER NONE | -1                  | RPS17-PDE8A                          | -1          |
| 7  | 57885654 | T    | C   | 3066.06 | 160 | 1/1 | 1/1 | 1/1 | 0/1 | 0/0 | 1/1 | 1/1 | intergenic, MODIFIER NONE | -1                  | RPS17-PDE8A                          | -1          |
| 7  | 1.18E+08 | G    | A   | 1637.38 | 146 | 1/1 | 1/1 | 1/1 | 0/1 | 0/0 | 1/1 | 1/1 | upstream_ MODIFIER NONE   | c.-8G>A             | ENSSSCG protein_coding               | ENSSSCT0 -1 |
| 7  | 1.18E+08 | G    | A   | 1637.38 | 146 | 1/1 | 1/1 | 1/1 | 0/1 | 0/0 | 1/1 | 1/1 | intergenic, MODIFIER NONE | -1                  | EFCAB11-ENSSSCG000000002431          | -1          |
| 7  | 1.19E+08 | A    | G   | 1186.82 | 125 | 1/1 | 1/1 | 1/1 | 1/1 | 0/0 | 1/1 | 1/1 | intron_vari MODIFIER NONE | c.581+7507T>C       | ENSSSCG protein_coding               | ENSSSCT0 8  |
| 7  | 1.19E+08 | G    | C   | 1111.03 | 109 | 1/1 | 1/1 | 1/1 | 0/1 | 0/0 | 1/1 | 1/1 | intergenic, MODIFIER NONE | -1                  | ENSSSCG000000002436-ENSSSCG000000024 | -1          |
| 7  | 1.19E+08 | G    | C   | 1316.83 | 120 | 1/1 | 1/1 | 1/1 | 0/1 | 0/0 | 1/1 | 1/1 | intergenic, MODIFIER NONE | -1                  | ENSSSCG000000002436-ENSSSCG000000024 | -1          |
| 7  | 1.21E+08 | C    | T   | 1917.18 | 143 | 1/1 | 1/1 | 1/1 | 0/1 | 0/0 | 0/1 | 0/1 | intergenic, MODIFIER NONE | -1                  | SLC24A4-ENSSSCG000000002451          | -1          |
| 7  | 1.21E+08 | C    | T   | 1283.56 | 146 | 1/1 | 1/1 | 1/1 | 1/1 | 0/0 | 1/1 | 0/1 | intron_vari MODIFIER NONE | c.246+3246C>T       | ENSSSCG protein_coding               | ENSSSCT0 2  |
| 8  | 5768168  | AG   | A   | 1536.66 | 196 | 0/0 | 0/1 | 0/1 | 1/1 | 1/1 | 0/1 | 1/1 | intergenic, MODIFIER NONE | -1                  | TMEM128-LYAR                         | -1          |
| 8  | 21945383 | A    | G   | 1116.71 | 139 | 0/0 | 0/1 | 1/1 | 1/1 | 1/1 | 0/1 | 1/1 | intergenic, MODIFIER NONE | -1                  | 75K-ENSSSCG000000008763              | -1          |
| 8  | 21945384 | T    | C   | 1257.37 | 140 | 0/0 | 0/1 | 1/1 | 1/1 | 1/1 | 1/1 | 1/1 | intergenic, MODIFIER NONE | -1                  | 75K-ENSSSCG000000008763              | -1          |
| 8  | 23009229 | CG   | C   | 1080.68 | 241 | 0/0 | 0/0 | 0/0 | 1/1 | 1/1 | 1/1 | 1/1 | intergenic, MODIFIER NONE | -1                  | ENSSSCG000000008763-PCDH7            | -1          |
| 8  | 26874123 | A    | C   | 1342.97 | 136 | 0/0 | 0/1 | 0/1 | 1/1 | 1/1 | 1/1 | 1/1 | intergenic, MODIFIER NONE | -1                  | PCDH7-ENSSSCG000000008767            | -1          |
| 8  | 32890209 | C    | CT  | 1085.9  | 213 | 0/0 | 0/1 | 0/1 | 1/1 | 1/1 | 0/1 | 0/1 | intron_vari MODIFIER NONE | c.406+1180_406+118  | N4BP2 protein_coding                 | ENSSSCT0 2  |
| 8  | 33762665 | GT   | G   | 1159.43 | 216 | 0/0 | 1/1 | 1/1 | 1/1 | 1/1 | 0/1 | 0/1 | intergenic, MODIFIER NONE | -1                  | NSUN7-U6                             | -1          |
| 8  | 39555553 | T    | TTA | 4723.47 | 227 | 0/0 | 0/0 | 0/0 | 1/1 | 1/1 | 1/1 | 1/1 | intron_vari MODIFIER NONE | c.2411+1756_2411+1  | CORIN protein_coding                 | ENSSSCT0 16 |
| 8  | 39652185 | GAGA | G   | 1633.46 | 200 | 0/0 | 0/0 | 0/0 | 1/1 | 1/1 | 0/1 | 0/1 | intron_vari MODIFIER NONE | c.1012+13959_1012+  | CORIN protein_coding                 | ENSSSCT0 5  |
| 8  | 45200463 | CT   | C   | 2816.01 | 228 | 0/0 | 0/1 | 0/0 | 1/1 | 1/1 | 1/1 | 1/1 | intergenic, MODIFIER NONE | -1                  | ENSSSCG00000024269-CPE               | -1          |
| 8  | 9266264  | GT   | G   | 2435.45 | 202 | 1/1 | 1/1 | 1/1 | 0/1 | 0/0 | 0/1 | 0/1 | intergenic, MODIFIER NONE | -1                  | BOD1L1-CPBE2                         | -1          |
| 8  | 9831694  | A    | T   | 1615.79 | 118 | 1/1 | 1/1 | 1/1 | 0/1 | 0/0 | 1/1 | 1/1 | intron_vari MODIFIER NONE | c.403+5675A>T       | CPBE2 protein_coding                 | ENSSSCT0 4  |
| 8  | 75790028 | G    | A   | 3313.66 | 386 | 1/1 | 1/1 | 1/1 | 0/0 | 0/0 | 0/1 | 0/0 | intergenic, MODIFIER NONE | -1                  | SDAD1-CXCL9                          | -1          |
| 8  | 1.38E+08 | AT   | A   | 2739.72 | 169 | 1/1 | 1/1 | 1/1 | 0/0 | 0/0 | 0/1 | 1/1 | intron_vari MODIFIER NONE | c.1510-27278delA    | ENSSSCG protein_coding               | ENSSSCT0 2  |
| 9  | 4683739  | A    | G   | 1065.02 | 152 | 0/0 | 1/1 | 0/1 | 1/1 | 1/1 | 1/1 | 1/1 | intergenic, MODIFIER NONE | -1                  | ENSSSCG00000014673-TRIM6             | -1          |
| 9  | 55718387 | A    | G   | 1027.08 | 160 | 0/0 | 0/1 | 0/1 | 1/1 | 1/1 | 1/1 | 0/1 | intergenic, MODIFIER NONE | -1                  | ENSSSCG00000015140-ENSSSCG000000015  | -1          |
| 9  | 55737157 | G    | T   | 1022.89 | 124 | 0/0 | 0/1 | 0/1 | 1/1 | 1/1 | 1/1 | 1/1 | intergenic, MODIFIER NONE | -1                  | ENSSSCG00000015140-ENSSSCG000000015  | -1          |
| 9  | 56254834 | T    | A   | 2035.29 | 138 | 0/0 | 0/1 | 0/1 | 1/1 | 1/1 | 1/1 | 1/1 | intergenic, MODIFIER NONE | -1                  | ENSSSCG00000015162-ENSSSCG000000025  | -1          |
| 9  | 58075484 | G    | A   | 1752.15 | 167 | 0/0 | 0/1 | 0/1 | 1/1 | 1/1 | 1/1 | 0/1 | intergenic, MODIFIER NONE | -1                  | TMEM218-ENSSSCG00000015211           | -1          |
| 9  | 1E+08    | T    | TGG | 1325.41 | 223 | 0/0 | 0/0 | 0/1 | 1/1 | 1/1 | 0/1 | 1/1 | intron_vari MODIFIER NONE | c.11403+301_11403+  | DNAH11 protein_coding                | ENSSSCT0 71 |
| 9  | 1E+08    | G    | A   | 1425.94 | 173 | 0/0 | 0/1 | 0/1 | 1/1 | 1/1 | 0/1 | 1/1 | intron_vari MODIFIER NONE | c.12103-726G>A      | DNAH11 protein_coding                | ENSSSCT0 75 |
| 9  | 1E+08    | A    | C   | 1166.23 | 168 | 0/0 | 0/1 | 0/1 | 1/1 | 1/1 | 0/1 | 1/1 | intron_vari MODIFIER NONE | c.12103-708A>C      | DNAH11 protein_coding                | ENSSSCT0 75 |
| 9  | 1.01E+08 | A    | G   | 1067.48 | 130 | 0/0 | 0/1 | 0/1 | 1/1 | 1/1 | 0/1 | 1/1 | upstream_ MODIFIER NONE   | c.-64A>G            | IL6 protein_coding                   | ENSSSCT0 -1 |
| 9  | 1.01E+08 | A    | G   | 1067.48 | 130 | 0/0 | 0/1 | 0/1 | 1/1 | 1/1 | 0/1 | 1/1 | intergenic, MODIFIER NONE | -1                  | TOMM7-IL6                            | -1          |
| 9  | 1.01E+08 | CG   | C   | 1229.56 | 254 | 0/0 | 0/1 | 0/0 | 1/1 | 1/1 | 0/0 | 0/1 | intergenic, MODIFIER NONE | -1                  | IL6-FAM126A                          | -1          |
| 9  | 1.06E+08 | C    | CAT | 3026.45 | 211 | 1/1 | 1/1 | 1/1 | 0/1 | 0/0 | 1/1 | 1/1 | intron_vari MODIFIER NONE | c.113-6918_113-6917 | ENSSSCG protein_coding               | ENSSSCT0 1  |
| 9  | 1.11E+08 | A    | G   | 1137.08 | 137 | 1/1 | 1/1 | 1/1 | 0/1 | 0/0 | 1/1 | 1/1 | intergenic, MODIFIER NONE | -1                  | GNAT3-GNAI1                          | -1          |
| 9  | 1.11E+08 | T    | C   | 1197.71 | 139 | 1/1 | 1/1 | 1/1 | 0/1 | 0/0 | 1/1 | 1/1 | intergenic, MODIFIER NONE | -1                  | GNAT3-GNAI1                          | -1          |
| 10 | 29938018 | A    | C   | 3839.15 | 362 | 0/0 | 0/1 | 0/1 | 1/1 | 1/1 | 0/1 | 1/1 | intergenic, MODIFIER NONE | -1                  | ENSSSCG00000010935-ENSSSCG000000010  | -1          |
| 10 | 45881163 | T    | C   | 3118.53 | 370 | 0/0 | 0/0 | 0/0 | 1/1 | 1/1 | 0/1 | 0/1 | intron_vari MODIFIER NONE | c.6324+407A>G       | SVIL protein_coding                  | ENSSSCT0 35 |
| 10 | 55452335 | A    | AT  | 1332.27 | 255 | 0/0 | 0/1 | 0/1 | 0/1 | 1/1 | 0/1 | 0/1 | intergenic, MODIFIER NONE | n.null_nullinsT     | GPR158-THNSL1                        | -1          |
| 10 | 64031898 | A    | G   | 1811.04 | 138 | 0/0 | 0/1 | 0/1 | 1/1 | 1/1 | 1/1 | 1/1 | intergenic, MODIFIER NONE | -1                  | GJD4-CCDC3                           | -1          |
| 10 | 8592670  | A    | G   | 2281.1  | 201 | 1/1 | 1/1 | 1/1 | 0/1 | 0/0 | 1/1 | 1/1 | intergenic, MODIFIER NONE | -1                  | ENSSSCG00000025480-ESRRG             | -1          |
| 10 | 8592671  | G    | C   | 2100.68 | 200 | 1/1 | 1/1 | 1/1 | 0/1 | 0/0 | 1/1 | 1/1 | intergenic, MODIFIER NONE | -1                  | ENSSSCG00000025480-ESRRG             | -1          |
| 10 | 8592675  | G    | A   | 2054.37 | 202 | 1/1 | 1/1 | 1/1 | 0/1 | 0/0 | 1/1 | 1/1 | intergenic, MODIFIER NONE | -1                  | ENSSSCG00000025480-ESRRG             | -1          |
| 10 | 26520830 | AGG  | A   | 2571.39 | 157 | 1/1 | 1/1 | 1/1 | 0/1 | 0/0 | 1/1 | 1/1 | intergenic, MODIFIER NONE | n.null_nulldelGG    | ssc-mir-181a-1-NR5A2                 | -1          |
| 10 | 26756700 | A    | G   | 1021.36 | 127 | 1/1 | 1/1 | 1/1 | 0/1 | 0/0 | 1/1 | 1/1 | intergenic, MODIFIER NONE | -1                  | ssc-mir-181a-1-NR5A2                 | -1          |
| 10 | 26756701 | A    | G   | 1018.12 | 127 | 1/1 | 1/1 | 1/1 | 0/1 | 0/0 | 1/1 | 1/1 | intergenic, MODIFIER NONE | -1                  | ssc-mir-181a-1-NR5A2                 | -1          |
| 10 | 32789851 | A    | T   | 1218.3  | 134 | 1/1 | 1/1 | 1/1 | 0/1 | 0/0 | 1/1 | 0/1 | intergenic, MODIFIER NONE | -1                  | DAPK1-ZCCHC6                         | -1          |
| 10 | 32789894 | T    | A   | 2168.52 | 151 | 1/1 | 1/1 | 1/1 | 0/1 | 0/0 | 1/1 | 0/1 | intergenic, MODIFIER NONE | -1                  | DAPK1-ZCCHC6                         | -1          |
| 10 | 32906608 | A    | G   | 4906.19 | 309 | 1/1 | 1/1 | 1/1 | 0/1 | 0/0 | 1/1 | 0/1 | intergenic, MODIFIER NONE | -1                  | DAPK1-ZCCHC6                         | -1          |
| 10 | 38853301 | TAA  | T   | 3562.76 | 182 | 1/1 | 1/1 | 1/1 | 0/0 | 0/0 | 1/1 | 0/0 | intergenic, MODIFIER NONE | n.null_nulldelAA    | SNORA31-U6                           | -1          |
| 10 | 42794101 | G    | A   | 1261.29 | 152 | 1/1 | 1/1 | 1/1 | 0/1 | 0/0 | 1/1 | 0/1 | intergenic, MODIFIER NONE | -1                  | ENSSSCG00000029287-ENSSSCG000000030  | -1          |
| 10 | 42818926 | T    | C   | 2018.35 | 151 | 1/1 | 1/1 | 1/1 | 0/1 | 0/0 | 1/1 | 0/1 | intergenic, MODIFIER NONE | -1                  | ENSSSCG00000029287-ENSSSCG000000030  | -1          |
| 10 | 44424052 | G    | A   | 2388.15 | 279 | 1/1 | 1/1 | 1/1 | 0/1 | 0/0 | 1/1 | 0/0 | intergenic, MODIFIER NONE | -1                  | BAMBI-ENSSSCG00000011017             | -1          |
| 10 | 44424058 | T    | C   | 2818.19 | 289 | 1/1 | 1/1 | 1/1 | 0/1 | 0/0 | 1/1 | 0/0 | intergenic, MODIFIER NONE | -1                  | BAMBI-ENSSSCG00000011017             | -1          |
| 10 | 51413315 | G    | GA  | 1716.06 | 184 | 1/1 | 1/1 | 1/1 | 0/1 | 0/0 | 1/1 | 0/0 | upstream_ MODIFIER NONE   | c.-150_-150insA     | NMT2 protein_coding                  | ENSSSCT0 -1 |
| 10 | 51413315 | G    | GA  | 1716.06 | 184 | 1/1 | 1/1 | 1/1 | 0/1 | 0/0 | 1/1 | 0/0 | intergenic, MODIFIER NONE | n.null_nullinsA     | U6-NMT2                              | -1          |

|    |          |    |         |          |     |     |     |     |     |     |     |     |                           |                      |                                      |             |
|----|----------|----|---------|----------|-----|-----|-----|-----|-----|-----|-----|-----|---------------------------|----------------------|--------------------------------------|-------------|
| 10 | 52511030 | A  | G       | 1075.31  | 137 | 1/1 | 1/1 | 1/1 | 0/1 | 0/0 | 1/1 | 1/1 | intergenic, MODIFIER NONE | -1                   | MRPL51-ENSSSCG00000028447            | -1          |
| 10 | 52511040 | A  | C       | 1221.41  | 150 | 1/1 | 1/1 | 1/1 | 0/1 | 0/0 | 1/1 | 0/1 | intergenic, MODIFIER NONE | -1                   | MRPL51-ENSSSCG00000028447            | -1          |
| 11 | 26161070 | A  | C       | 1055.38  | 162 | 0/0 | 0/1 | 0/0 | 0/1 | 1/1 | 1/1 | 0/1 | intergenic, MODIFIER NONE | -1                   | ENSSSCG00000024707-RGCC              | -1          |
| 11 | 71093622 | A  | T       | 1221.43  | 211 | 0/0 | 0/1 | 0/1 | 1/1 | 1/1 | 1/1 | 0/1 | intron_vari MODIFIER NONE | c.273+592A>T         | ENSSSCG protein_coding               | ENSSSCT0 2  |
| 11 | 80970713 | G  | A       | 1544.19  | 140 | 0/0 | 0/1 | 1/1 | 1/1 | 1/1 | 0/1 | 1/1 | intergenic, MODIFIER NONE | -1                   | ENSSSCG00000026317-EFNB2             | -1          |
| 12 | 39592974 | T  | TC      | 1977.15  | 262 | 1/1 | 0/1 | 1/1 | 0/0 | 0/0 | 0/1 | 0/1 | upstream, MODIFIER NONE   | c.-87_-87insG        | ZNHIT3 protein_coding                | ENSSSCT0 -1 |
| 12 | 39592974 | T  | TC      | 1977.15  | 262 | 1/1 | 0/1 | 1/1 | 0/0 | 0/0 | 0/1 | 0/1 | intergenic, MODIFIER NONE | n.null_nullinsC      | ZNHIT3-CA4                           | -1          |
| 13 | 403773   | C  | CA      | 3243.74  | 202 | 0/0 | 0/0 | 0/1 | 1/1 | 1/1 | 1/1 | 1/1 | intron_vari MODIFIER NONE | c.180+44121_180+44   | ENSSSCG protein_coding               | ENSSSCT0 1  |
| 13 | 1.34E+08 | G  | A       | 1307.6   | 143 | 0/0 | 0/1 | 0/1 | 1/1 | 1/1 | 1/1 | 0/1 | intergenic, MODIFIER NONE | -1                   | RFC4-MASP1                           | -1          |
| 13 | 1.87E+08 | G  | GA      | 1764.93  | 238 | 0/0 | 0/1 | 0/1 | 1/1 | 1/1 | 1/1 | 1/1 | intergenic, MODIFIER NONE | n.null_nullinsA      | ROBO1-ENSSSCG00000012002             | -1          |
| 13 | 2.15E+08 | C  | CGGGAGA | 10414.89 | 225 | 0/0 | 0/1 | 0/1 | 1/1 | 1/1 | 1/1 | 0/1 | intergenic, MODIFIER NONE | n.null_nullinsGGGAG/ | ENSSSCG00000012078-ENSSSCG000000012  | -1          |
| 13 | 17017335 | A  | C       | 1424.72  | 135 | 1/1 | 1/1 | 1/1 | 0/1 | 0/0 | 0/1 | 0/1 | intergenic, MODIFIER NONE | -1                   | AZi2-ENSSSCG00000024265              | -1          |
| 13 | 86845406 | T  | C       | 1103.1   | 154 | 1/1 | 1/1 | 1/1 | 0/1 | 0/0 | 1/1 | 1/1 | intron_vari MODIFIER NONE | c.*132-88864A>G      | CEP70 protein_coding                 | ENSSSCT0 18 |
| 13 | 88109145 | A  | G       | 1222.27  | 180 | 1/1 | 1/1 | 1/1 | 0/1 | 0/0 | 1/1 | 1/1 | intron_vari MODIFIER NONE | c.185+2599T>C        | ENSSSCG protein_coding               | ENSSSCT0 1  |
| 13 | 1E+08    | A  | AT      | 1284.7   | 222 | 1/1 | 1/1 | 1/1 | 0/1 | 0/0 | 1/1 | 1/1 | intergenic, MODIFIER NONE | n.null_nullinsT      | ENSSSCG000000026131-ENSSSCG000000011 | -1          |
| 13 | 1.13E+08 | A  | AAC     | 4587.75  | 254 | 1/1 | 1/1 | 1/1 | 0/1 | 0/0 | 1/1 | 1/1 | intergenic, MODIFIER NONE | n.null_nullinsAC     | U6-SI                                | -1          |
| 13 | 1.85E+08 | A  | G       | 1810.41  | 146 | 1/1 | 1/1 | 1/1 | 0/1 | 0/0 | 1/1 | 1/1 | intergenic, MODIFIER NONE | -1                   | ENSSSCG00000029384-ROBO1             | -1          |
| 13 | 1.85E+08 | G  | C       | 1842.45  | 148 | 1/1 | 1/1 | 1/1 | 0/1 | 0/0 | 1/1 | 1/1 | intergenic, MODIFIER NONE | -1                   | ENSSSCG00000029384-ROBO1             | -1          |
| 13 | 1.88E+08 | A  | G       | 1522     | 143 | 1/1 | 1/1 | 1/1 | 0/1 | 0/0 | 1/1 | 0/1 | intergenic, MODIFIER NONE | -1                   | ENSSSCG00000012002-LIPI              | -1          |
| 13 | 1.88E+08 | G  | C       | 1399.49  | 126 | 1/1 | 1/1 | 1/1 | 0/1 | 0/0 | 1/1 | 0/1 | intergenic, MODIFIER NONE | -1                   | ENSSSCG00000012002-LIPI              | -1          |
| 13 | 1.88E+08 | G  | T       | 1381.49  | 128 | 1/1 | 1/1 | 1/1 | 0/1 | 0/0 | 1/1 | 0/1 | intergenic, MODIFIER NONE | -1                   | ENSSSCG00000012002-LIPI              | -1          |
| 13 | 1.99E+08 | G  | A       | 1236.27  | 174 | 1/1 | 1/1 | 1/1 | 0/1 | 0/0 | 1/1 | 0/1 | intergenic, MODIFIER NONE | -1                   | ENSSSCG00000012021-ssc-mir-155       | -1          |
| 13 | 2.06E+08 | A  | C       | 1909.65  | 109 | 1/1 | 1/1 | 0/1 | 1/1 | 0/0 | 1/1 | 1/1 | intergenic, MODIFIER NONE | -1                   | C21orf62-U6                          | -1          |
| 14 | 62454044 | GT | G       | 2509.49  | 237 | 0/0 | 0/1 | 0/1 | 1/1 | 1/1 | 1/1 | 0/1 | intron_vari MODIFIER NONE | c.3350+733delA       | SIPAL12 protein_coding               | ENSSSCT0 11 |
| 14 | 2347666  | C  | G       | 1609.36  | 139 | 1/1 | 1/1 | 1/1 | 0/1 | 0/0 | 1/1 | 1/1 | intergenic, MODIFIER NONE | -1                   | U6-U6                                | -1          |
| 14 | 2347673  | G  | A       | 1612.36  | 137 | 1/1 | 1/1 | 1/1 | 0/1 | 0/0 | 1/1 | 1/1 | intergenic, MODIFIER NONE | -1                   | U6-U6                                | -1          |
| 14 | 9485038  | CA | C       | 3348.82  | 212 | 1/1 | 1/1 | 1/1 | 0/0 | 0/0 | 0/1 | 1/1 | intergenic, MODIFIER NONE | -1                   | ADAM28-ADAMDEC1                      | -1          |
| 14 | 72609770 | A  | AT      | 1430.63  | 261 | 1/1 | 1/1 | 1/1 | 0/0 | 0/0 | 1/1 | 0/0 | intergenic, MODIFIER NONE | n.null_nullinsT      | ENSSSCG00000028393-CTNNA3            | -1          |
| 14 | 72730900 | C  | T       | 1915.57  | 151 | 1/1 | 1/1 | 1/1 | 0/1 | 0/0 | 1/1 | 0/1 | intergenic, MODIFIER NONE | -1                   | ENSSSCG00000028393-CTNNA3            | -1          |
| 14 | 73691524 | G  | GAA     | 2039.67  | 211 | 1/1 | 1/1 | 1/1 | 0/1 | 0/0 | 0/1 | 0/1 | intergenic, MODIFIER NONE | n.null_nullinsAA     | ENSSSCG00000028393-CTNNA3            | -1          |
| 14 | 74084160 | C  | A       | 1497.43  | 157 | 1/1 | 1/1 | 1/1 | 0/1 | 0/0 | 1/1 | 0/1 | intergenic, MODIFIER NONE | -1                   | ENSSSCG00000028393-CTNNA3            | -1          |
| 14 | 88418838 | C  | T       | 1761.51  | 166 | 1/1 | 1/1 | 1/1 | 0/1 | 0/0 | 1/1 | 0/1 | intergenic, MODIFIER NONE | -1                   | ENSSSCG00000010330-ANXA11            | -1          |
| 14 | 97440802 | C  | T       | 1038.36  | 129 | 1/1 | 1/1 | 1/1 | 0/1 | 0/0 | 1/1 | 1/1 | intergenic, MODIFIER NONE | -1                   | WDFY4-ENSSSCG00000010385             | -1          |
| 14 | 97440803 | A  | G       | 1103.34  | 130 | 1/1 | 1/1 | 1/1 | 0/1 | 0/0 | 1/1 | 1/1 | intergenic, MODIFIER NONE | -1                   | WDFY4-ENSSSCG00000010385             | -1          |
| 15 | 19740207 | C  | A       | 1451.84  | 147 | 0/0 | 0/1 | 0/1 | 1/1 | 1/1 | 1/1 | 1/1 | intergenic, MODIFIER NONE | -1                   | ENSSSCG00000029118-ENSSSCG000000015  | -1          |
| 15 | 24436358 | T  | C       | 1285.4   | 173 | 0/0 | 0/1 | 0/1 | 1/1 | 1/1 | 1/1 | 1/1 | intergenic, MODIFIER NONE | -1                   | U6-ENSSSCG000000026504               | -1          |
| 15 | 29972309 | G  | A       | 1001.36  | 145 | 0/0 | 0/1 | 0/1 | 1/1 | 1/1 | 1/1 | 0/1 | intergenic, MODIFIER NONE | -1                   | GYPC-ENSSSCG00000023800              | -1          |
| 15 | 34676931 | C  | T       | 1022.27  | 153 | 0/0 | 0/1 | 0/1 | 1/1 | 1/1 | 1/1 | 0/1 | upstream, MODIFIER NONE   | c.-76C>T             | ENSSSCG protein_coding               | ENSSSCT0 -1 |
| 15 | 34676931 | C  | T       | 1022.27  | 153 | 0/0 | 0/1 | 0/1 | 1/1 | 1/1 | 1/1 | 0/1 | intergenic, MODIFIER NONE | -1                   | TSN-ENSSSCG00000015730               | -1          |
| 15 | 38157850 | T  | TA      | 1519.66  | 225 | 0/0 | 0/1 | 0/1 | 1/1 | 1/1 | 1/1 | 1/1 | intergenic, MODIFIER NONE | n.null_nullinsA      | ENSSSCG00000015747-ENSSSCG000000029  | -1          |
| 15 | 40325994 | A  | C       | 1181.59  | 141 | 0/0 | 0/1 | 0/1 | 1/1 | 1/1 | 1/1 | 0/1 | intergenic, MODIFIER NONE | -1                   | ENSSSCG00000015748-U6                | -1          |
| 15 | 65506863 | G  | A       | 1070.23  | 133 | 0/0 | 0/1 | 0/1 | 1/1 | 1/1 | 1/1 | 1/1 | intergenic, MODIFIER NONE | -1                   | SNORA19-HS65T1                       | -1          |
| 15 | 65506911 | C  | T       | 1551.78  | 156 | 0/0 | 0/1 | 0/1 | 1/1 | 1/1 | 1/1 | 1/1 | intergenic, MODIFIER NONE | -1                   | SNORA19-HS65T1                       | -1          |
| 15 | 1.09E+08 | A  | C       | 1425.75  | 160 | 0/0 | 0/1 | 0/1 | 1/1 | 1/1 | 1/1 | 1/1 | intergenic, MODIFIER NONE | -1                   | TMEFF2-STK17B                        | -1          |
| 15 | 1.28E+08 | G  | A       | 1458.16  | 152 | 0/0 | 0/1 | 0/1 | 1/1 | 1/1 | 0/1 | 0/1 | intergenic, MODIFIER NONE | -1                   | SPAG16-ENSSSCG00000029683            | -1          |
| 15 | 1.28E+08 | T  | C       | 1488.16  | 152 | 0/0 | 0/1 | 0/1 | 1/1 | 1/1 | 0/1 | 0/1 | intergenic, MODIFIER NONE | -1                   | SPAG16-ENSSSCG00000029683            | -1          |
| 15 | 1.36E+08 | G  | T       | 1526.59  | 126 | 0/0 | 0/1 | 0/1 | 1/1 | 1/1 | 1/1 | 1/1 | intergenic, MODIFIER NONE | -1                   | U6-SNORA31                           | -1          |
| 15 | 443360   | T  | C       | 1008.08  | 145 | 1/1 | 1/1 | 1/1 | 0/1 | 0/0 | 0/1 | 1/1 | intergenic, MODIFIER NONE | -1                   | ENSSSCG00000023716-U6                | -1          |
| 15 | 443446   | A  | T       | 1141.8   | 127 | 1/1 | 1/1 | 1/1 | 0/1 | 0/0 | 0/1 | 1/1 | intergenic, MODIFIER NONE | -1                   | ENSSSCG00000023716-U6                | -1          |
| 15 | 516298   | T  | C       | 1728.49  | 166 | 1/1 | 1/1 | 1/1 | 0/1 | 0/0 | 0/1 | 1/1 | intergenic, MODIFIER NONE | -1                   | ENSSSCG00000023716-U6                | -1          |
| 15 | 1.46E+08 | C  | T       | 1712.54  | 136 | 1/1 | 1/1 | 1/1 | 0/1 | 0/0 | 1/1 | 1/1 | intergenic, MODIFIER NONE | -1                   | COPS7B-NPPC                          | -1          |
| 15 | 1.46E+08 | C  | G       | 1087.59  | 116 | 1/1 | 1/1 | 1/1 | 0/1 | 0/0 | 1/1 | .   | intergenic, MODIFIER NONE | -1                   | COPS7B-NPPC                          | -1          |
| 15 | 1.47E+08 | A  | T       | 1064.48  | 143 | 1/1 | 1/1 | 1/1 | 0/1 | 0/0 | 1/1 | 1/1 | intergenic, MODIFIER NONE | -1                   | ECELL1-ENSSSCG000000024181           | -1          |
| 15 | 1.47E+08 | C  | T       | 1946.63  | 140 | 1/1 | 1/1 | 1/1 | 0/1 | 0/0 | 1/1 | 1/1 | intergenic, MODIFIER NONE | -1                   | NGEF-ENSSSCG00000016297              | -1          |
| 15 | 1.51E+08 | C  | T       | 2555.34  | 143 | 1/1 | 0/1 | 1/1 | 0/0 | 0/0 | 0/1 | 0/1 | intergenic, MODIFIER NONE | -1                   | ACKR3-COPS8                          | -1          |
| 15 | 1.52E+08 | A  | G       | 1580.99  | 150 | 1/1 | 1/1 | 1/1 | 0/1 | 0/0 | 0/1 | 0/1 | intron_vari MODIFIER NONE | c.354+1314A>G        | ENSSSCG protein_coding               | ENSSSCT0 7  |
| 15 | 1.54E+08 | G  | A       | 1083.57  | 293 | 1/1 | 1/1 | 1/1 | 0/1 | 0/0 | 0/1 | 1/1 | intergenic, MODIFIER NONE | -1                   | ENSSSCG00000024643-ENSSSCG000000029  | -1          |
| 15 | 1.54E+08 | C  | A       | 1180.56  | 293 | 1/1 | 1/1 | 1/1 | 0/1 | 0/0 | 0/1 | 1/1 | intergenic, MODIFIER NONE | -1                   | ENSSSCG00000024643-ENSSSCG000000029  | -1          |
| 15 | 1.54E+08 | C  | T       | 1229.31  | 299 | 1/1 | 1/1 | 1/1 | 0/1 | 0/0 | 0/1 | 1/1 | intergenic, MODIFIER NONE | -1                   | ENSSSCG00000024643-ENSSSCG000000029  | -1          |
| 16 | 8032570  | GA | G       | 2914.9   | 230 | 0/0 | 0/1 | 0/0 | 1/1 | 1/1 | 1/1 | 0/1 | intergenic, MODIFIER NONE | -1                   | 7SK-CDH18                            | -1          |
| 16 | 20790534 | A  | G       | 1658.17  | 148 | 0/0 | 0/1 | 0/1 | 1/1 | 1/1 | 1/1 | 0/1 | intergenic, MODIFIER NONE | -1                   | AMACR-C1QTNF3                        | -1          |
| 16 | 20437451 | T  | C       | 1165.95  | 157 | 1/1 | 1/1 | 1/1 | 0/1 | 0/0 | 0/1 | 1/1 | intron_vari MODIFIER NONE | c.1086-146A>G        | ADAMTS1 protein_coding               | ENSSSCT0 8  |
| 16 | 20596069 | C  | T       | 1601.92  | 164 | 1/1 | 1/1 | 1/1 | 0/1 | 0/0 | 0/1 | 1/1 | intergenic, MODIFIER NONE | -1                   | ADAMTS12-ENSSSCG00000027886          | -1          |
| 16 | 20596072 | G  | A       | 1397.99  | 157 | 1/1 | 1/1 | 1/1 | 0/1 | 0/0 | 0/1 | 1/1 | intergenic, MODIFIER NONE | -1                   | ADAMTS12-ENSSSCG00000027886          | -1          |
| 16 | 20596086 | G  | A       | 1399.56  | 168 | 1/1 | 1/1 | 1/1 | 0/1 | 0/0 | 0/1 | 1/1 | intergenic, MODIFIER NONE | -1                   | ADAMTS12-ENSSSCG00000027886          | -1          |
| 16 | 24919650 | G  | C       | 4563.38  | 343 | 1/1 | 1/1 | 1/1 | 0/0 | 0/0 | 0/1 | 0/1 | intergenic, MODIFIER NONE | -1                   | EGFLAM-LIFR                          | -1          |
| 16 | 51368450 | T  | A       | 1304.22  | 150 | 1/1 | 1/1 | 1/1 | 0/1 | 0/0 | 0/0 | 1/1 | intron_vari MODIFIER NONE | c.-40-3851T>A        | ENSSSCG protein_coding               | ENSSSCT0 1  |

|    |          |    |    |         |     |     |     |     |     |     |     |     |                           |                     |    |                                     |             |
|----|----------|----|----|---------|-----|-----|-----|-----|-----|-----|-----|-----|---------------------------|---------------------|----|-------------------------------------|-------------|
| 16 | 74371260 | A  | G  | 1548.09 | 145 | 1/1 | 1/1 | 1/1 | 0/1 | 0/0 | 0/1 | 0/1 | intergenic, MODIFIER NONE |                     | -1 | ENSSSCG00000017069-HAND1            | -1          |
| 17 | 36984058 | C  | CT | 1772.88 | 238 | 0/0 | 0/0 | 0/0 | 0/1 | 1/1 | 1/1 | 1/1 | intergenic, MODIFIER NONE | n.null_nullinsT     | -1 | OXT-MRPS26                          | -1          |
| 17 | 40342407 | C  | T  | 1218.62 | 126 | 0/0 | 0/1 | 0/1 | 1/1 | 1/1 | 1/1 | 1/1 | upstream, MODIFIER NONE   | c.-1C>T             | -1 | ENSSSCG( protein_coding             | ENSSSCT0 -1 |
| 17 | 40342407 | C  | T  | 1218.62 | 126 | 0/0 | 0/1 | 0/1 | 1/1 | 1/1 | 1/1 | 1/1 | intron_vari MODIFIER NONE | c.-172+1139C>T      | -1 | DUSP15 protein_coding               | ENSSSCT0 3  |
| 17 | 40342423 | A  | T  | 1394.48 | 134 | 0/0 | 0/1 | 0/1 | 1/1 | 1/1 | 1/1 | 1/1 | upstream, MODIFIER NONE   | c.-1A>T             | -1 | ENSSSCG( protein_coding             | ENSSSCT0 -1 |
| 17 | 40342423 | A  | T  | 1394.48 | 134 | 0/0 | 0/1 | 0/1 | 1/1 | 1/1 | 1/1 | 1/1 | intron_vari MODIFIER NONE | c.-172+1155A>T      | -1 | DUSP15 protein_coding               | ENSSSCT0 3  |
| 17 | 40342441 | T  | G  | 1631.21 | 147 | 0/0 | 0/1 | 0/1 | 1/1 | 1/1 | 1/1 | 1/1 | upstream, MODIFIER NONE   | c.-1T>G             | -1 | ENSSSCG( protein_coding             | ENSSSCT0 -1 |
| 17 | 40342441 | T  | G  | 1631.21 | 147 | 0/0 | 0/1 | 0/1 | 1/1 | 1/1 | 1/1 | 1/1 | intron_vari MODIFIER NONE | c.-172+1173T>G      | -1 | DUSP15 protein_coding               | ENSSSCT0 3  |
| 17 | 43895202 | T  | A  | 1201.82 | 145 | 0/0 | 0/1 | 0/1 | 1/1 | 1/1 | 1/1 | 1/1 | intron_vari MODIFIER NONE | c.24+870A>T         | -1 | ENSSSCG( protein_coding             | ENSSSCT0 1  |
| 17 | 610985   | C  | T  | 1399.86 | 141 | 1/1 | 1/1 | 1/1 | 0/1 | 0/0 | 1/1 | 1/1 | intergenic, MODIFIER NONE |                     | -1 | ENSSSCG00000020727-LONRF1           | -1          |
| 17 | 1091800  | T  | C  | 1624.73 | 160 | 1/1 | 1/1 | 1/1 | 0/1 | 0/0 | 1/1 | 1/1 | intergenic, MODIFIER NONE |                     | -1 | ENSSSCG00000006970-ENSSSCG000000006 | -1          |
| 17 | 3089563  | G  | T  | 1664.64 | 139 | 1/1 | 1/1 | 1/1 | 0/1 | 0/0 | 1/1 | 1/1 | intergenic, MODIFIER NONE |                     | -1 | ssc-mir-383-TUSC3                   | -1          |
| 17 | 3089566  | T  | C  | 1645.72 | 136 | 1/1 | 1/1 | 1/1 | 0/1 | 0/0 | 1/1 | 1/1 | intergenic, MODIFIER NONE |                     | -1 | ssc-mir-383-TUSC3                   | -1          |
| 17 | 6783031  | T  | C  | 1099.24 | 149 | 1/1 | 1/1 | 1/1 | 0/1 | 0/0 | 1/1 | 0/1 | intergenic, MODIFIER NONE |                     | -1 | ENSSSCG00000006996-CH242-286D19.2   | -1          |
| 17 | 12807473 | A  | G  | 1111.44 | 104 | 1/1 | 1/1 | 1/1 | 0/1 | 0/0 | 1/1 | 1/1 | intergenic, MODIFIER NONE |                     | -1 | CHRN3-SMIM19                        | -1          |
| 17 | 12857961 | C  | T  | 1370.74 | 140 | 1/1 | 1/1 | 1/1 | 0/1 | 0/0 | 1/1 | 1/1 | intergenic, MODIFIER NONE |                     | -1 | SMIM19-SLC20A2                      | -1          |
| 18 | 40749240 | G  | GA | 1047.25 | 198 | 0/0 | 0/1 | 0/1 | 1/1 | 1/1 | 1/1 | 0/1 | intron_vari MODIFIER NONE | c.-141+11760_-141+. | -1 | ELMO1 protein_coding                | ENSSSCT0 14 |
| 18 | 46377954 | A  | G  | 1019.53 | 97  | 0/0 | 0/1 | 0/1 | 1/1 | 1/1 | 1/1 | 1/1 | intergenic, MODIFIER NONE |                     | -1 | PAC1-GHRHR                          | -1          |
| 18 | 1133221  | C  | G  | 1099.8  | 119 | 1/1 | 1/1 | 1/1 | 1/1 | 0/0 | 1/1 | 1/1 | intergenic, MODIFIER NONE |                     | -1 | ENSSSCG00000026661-PTPRQ            | -1          |
| 18 | 1139071  | A  | G  | 1175.86 | 159 | 1/1 | 1/1 | 1/1 | 0/1 | 0/0 | 1/1 | 0/1 | intergenic, MODIFIER NONE |                     | -1 | ENSSSCG00000026661-PTPRQ            | -1          |
| 18 | 1203153  | G  | A  | 1499.59 | 165 | 1/1 | 1/1 | 1/1 | 0/1 | 0/0 | 1/1 | 0/1 | intergenic, MODIFIER NONE |                     | -1 | ENSSSCG00000026661-PTPRQ            | -1          |
| 18 | 17502037 | AG | A  | 1799.14 | 241 | 1/1 | 1/1 | 1/1 | 0/0 | 0/0 | 1/1 | 1/1 | intergenic, MODIFIER NONE |                     | -1 | CHCHD3-PODXL                        | -1          |
