# Supplementary material for: No excessive mutations in transcription activator-like effector nuclease-mediated α-1,3-galactosyltransferase knockout Yucatan miniature pigs
Source: PubMed Central journal article supplement (PMC6946973; doi:10.5713/ajas.19.0480), 2019-08-23
Supplement: ajas-19-0480-suppl5.pdf [file ajas-19-0480-suppl5.pdf]

Supplementary Table 5. Variant calls of wild type strain control WT2

| #CHROM | POS      | ID | REF | ALT    | QUAL    | FILTER | DP  | Donor | CJ1 | CB1 | CB3 | WT1 | WT2 | WT3 | EFF[*].EFF<br>ECT         | EFF[*].JM<br>PACT    | EFF[*].FU<br>NCLASS | EFF[*].CO<br>DON                     | EFF[*].AA<br>_LEN | EFF[*].GE<br>NE | EFF[*].BIO<br>TYPE | EFF[*].CO<br>DING | EFF[*].TRI<br>D | EFF[*].RA<br>NK              | Head | Note |
|--------|----------|----|-----|--------|---------|--------|-----|-------|-----|-----|-----|-----|-----|-----|---------------------------|----------------------|---------------------|--------------------------------------|-------------------|-----------------|--------------------|-------------------|-----------------|------------------------------|------|------|
| 1      | 1.09E+08 |    | C   | CA     | 1282.4  |        | 229 | 0/0   | 0/0 | 0/0 | 1/1 | 0/1 | 1/1 | 1/1 | upstream, MODIFIER NONE   | n.-1_-1insA          | -1                  | SCARNA1 snoRNA                       |                   | ENSSSCT0        | -1                 |                   | #CHROM          | Chromosome                   |      |      |
| 1      | 1.09E+08 |    | C   | CA     | 1282.4  |        | 229 | 0/0   | 0/0 | 0/0 | 1/1 | 0/1 | 1/1 | 1/1 | upstream, MODIFIER NONE   | n.-1_-1insA          | -1                  | SCARNA1 snoRNA                       |                   | ENSSSCT0        | -1                 |                   | POS             | Position                     |      |      |
| 1      | 1.09E+08 |    | C   | CA     | 1282.4  |        | 229 | 0/0   | 0/0 | 0/0 | 1/1 | 0/1 | 1/1 | 1/1 | intron_vari MODIFIER NONE | c.16+1468_16+1469i   | -1                  | ACAA2 protein_coding                 |                   | ENSSSCT0        | 1                  |                   | ID              | Identification               |      |      |
| 1      | 1.82E+08 |    | T   | C      | 4023.92 |        | 210 | 0/0   | 0/1 | 1/1 | 1/1 | 1/1 | 1/1 | 1/1 | intergenic, MODIFIER NONE |                      | -1                  | U2-DIS3L                             |                   |                 |                    | -1                | REF             | Reference seq (Sscrofa 10.2) |      |      |
| 1      | 1.9E+08  |    | A   | G      | 1167.65 |        | 122 | 0/0   | 1/1 | 0/1 | 1/1 | 1/1 | 1/1 | 1/1 | intergenic, MODIFIER NONE |                      | -1                  | S5_rRNA-U6                           |                   |                 |                    | -1                | ALT             | Alternative sequence         |      |      |
| 1      | 2.17E+08 |    | GAA | G      | 1834.22 |        | 209 | 0/0   | 0/1 | 0/1 | 0/1 | 0/1 | 1/1 | 0/1 | intergenic, MODIFIER NONE | n.null_nulldelAA     | -1                  | GPB5-ENSSSCG00000005118              |                   |                 |                    | -1                | QUAL            | Quality                      |      |      |
| 1      | 19885280 |    | C   | T      | 1176.07 |        | 149 | 1/1   | 1/1 | 1/1 | 1/1 | 0/1 | 0/1 | 0/1 | intergenic, MODIFIER NONE |                      | -1                  | U6-SAMD5                             |                   |                 |                    | -1                | FILTER          |                              |      |      |
| 1      | 19885288 |    | A   | C      | 1300.5  |        | 148 | 1/1   | 1/1 | 1/1 | 0/1 | 0/1 | 0/0 | 1/1 | intergenic, MODIFIER NONE |                      | -1                  | U6-SAMD5                             |                   |                 |                    | -1                | DP              | Total depth                  |      |      |
| 1      | 19885296 |    | T   | C      | 1361.47 |        | 154 | 1/1   | 1/1 | 1/1 | 0/1 | 0/1 | 0/0 | 1/1 | intergenic, MODIFIER NONE |                      | -1                  | U6-SAMD5                             |                   |                 |                    | -1                | EFF[*].EFFE     | Genetic element              |      |      |
| 1      | 23161886 |    | T   | C      | 1543.19 |        | 172 | 1/1   | 1/1 | 1/1 | 1/1 | 0/1 | 0/0 | 0/1 | intergenic, MODIFIER NONE |                      | -1                  | ENSSSCG00000004123-ENSSSCG000000026  |                   |                 |                    | -1                | EFF[*].JMP      | Functional annotation        |      |      |
| 1      | 23165345 |    | T   | C      | 1306.48 |        | 152 | 1/1   | 1/1 | 1/1 | .   | 0/1 | 0/0 | 0/1 | intergenic, MODIFIER NONE |                      | -1                  | ENSSSCG00000004123-ENSSSCG000000026  |                   |                 |                    | -1                | EFF[*].FUNCLASS |                              |      |      |
| 1      | 1.23E+08 |    | AT  | A      | 2468.34 |        | 239 | 1/1   | 1/1 | 1/1 | 1/1 | 0/1 | 0/0 | 0/1 | intergenic, MODIFIER NONE |                      | -1                  | ANXA2-ENSSSCG00000004580             |                   |                 |                    | -1                | EFF[*].CODON    |                              |      |      |
| 1      | 1.66E+08 |    | TG  | T      | 4071.08 |        | 234 | 1/1   | 0/1 | 0/1 | 1/1 | 1/1 | 0/0 | 0/1 | intergenic, MODIFIER NONE |                      | -1                  | FBXO15-ENSSSCG000000025660           |                   |                 |                    | -1                | EFF[*].AA       |                              |      |      |
| 1      | 2.2E+08  |    | C   | T      | 7330.54 |        | 340 | 1/1   | 1/1 | 1/1 | 1/1 | 1/1 | 0/0 | 1/1 | intergenic, MODIFIER NONE |                      | -1                  | U6-TUSC1                             |                   |                 |                    | -1                | EFF[*].AA_LEN   |                              |      |      |
| 1      | 2.22E+08 |    | T   | C      | 6677.54 |        | 264 | 1/1   | 1/1 | 1/1 | 1/1 | 1/1 | 0/0 | 1/1 | intron_vari MODIFIER NONE | c.298+8250T>C        | -1                  | ELAVL2 protein_coding                |                   | ENSSSCT0        | 4                  |                   | EFF[*].GENE     |                              |      |      |
| 1      | 2.25E+08 |    | G   | C      | 1317.39 |        | 287 | 1/1   | 1/1 | 1/1 | 1/1 | 1/1 | 0/0 | 1/1 | intergenic, MODIFIER NONE |                      | -1                  | IFN-ALPHA-11-CH242-414D14.1          |                   |                 |                    | -1                | EFF[*].BIOTYPE  |                              |      |      |
| 1      | 2.25E+08 |    | G   | A      | 1570.28 |        | 282 | 1/1   | 1/1 | 1/1 | 1/1 | 1/1 | 0/0 | 1/1 | intergenic, MODIFIER NONE |                      | -1                  | IFN-ALPHA-11-CH242-414D14.1          |                   |                 |                    | -1                | EFF[*].CODING   |                              |      |      |
| 1      | 2.25E+08 |    | T   | C      | 1720.74 |        | 220 | 1/1   | 1/1 | 1/1 | 1/1 | 1/1 | 0/0 | 1/1 | intergenic, MODIFIER NONE |                      | -1                  | IFN-ALPHA-11-CH242-414D14.1          |                   |                 |                    | -1                | EFF[*].TRID     |                              |      |      |
| 1      | 2.25E+08 |    | A   | G      | 1566.74 |        | 222 | 1/1   | 1/1 | 1/1 | 1/1 | 1/1 | 0/0 | 1/1 | intergenic, MODIFIER NONE |                      | -1                  | IFN-ALPHA-11-CH242-414D14.1          |                   |                 |                    | -1                | EFF[*].RANK     |                              |      |      |
| 1      | 2.25E+08 |    | T   | C      | 1727.73 |        | 219 | 1/1   | 1/1 | 1/1 | 1/1 | 1/1 | 0/0 | 1/1 | intergenic, MODIFIER NONE |                      | -1                  | IFN-ALPHA-11-CH242-414D14.1          |                   |                 |                    | -1                | .               | Not called                   |      |      |
| 1      | 2.25E+08 |    | C   | A      | 4065.97 |        | 298 | 1/1   | 1/1 | 1/1 | 1/1 | 1/1 | 0/0 | 1/1 | intron_vari MODIFIER NONE | c.399+10379C>A       | -1                  | IFN-ALPHi protein_coding             |                   | ENSSSCT0        | 3                  |                   | 0/0             | Homogeneous to REF           |      |      |
| 1      | 2.29E+08 |    | T   | C      | 5339.64 |        | 288 | 1/1   | 1/1 | 1/1 | 1/1 | 1/1 | 0/0 | 1/1 | intron_vari MODIFIER NONE | c.802+827A>G         | -1                  | SH3GL2 protein_coding                |                   | ENSSSCT0        | 9                  |                   | 0/1             | Homogeneous to REF           |      |      |
| 1      | 2.31E+08 |    | A   | G      | 5747.55 |        | 235 | 1/1   | 1/1 | 1/1 | 1/1 | 1/1 | 0/0 | 1/1 | intergenic, MODIFIER NONE |                      | -1                  | TTC39B-ZDHHC21                       |                   |                 |                    | -1                | 1/1             | Homogeneous to ALT           |      |      |
| 1      | 2.31E+08 |    | A   | G      | 5654.54 |        | 233 | 1/1   | 1/1 | 1/1 | 1/1 | 1/1 | 0/0 | 1/1 | intergenic, MODIFIER NONE |                      | -1                  | TTC39B-ZDHHC21                       |                   |                 |                    | -1                |                 |                              |      |      |
| 1      | 2.89E+08 |    | C   | T      | 1589.58 |        | 148 | 1/1   | 1/1 | 1/1 | 1/1 | 0/1 | 0/0 | 1/1 | intergenic, MODIFIER NONE |                      | -1                  | ENSSSCG00000005502-ENSSSCG000000027  |                   |                 |                    | -1                |                 |                              |      |      |
| 1      | 2.89E+08 |    | A   | T      | 1761.99 |        | 144 | 1/1   | 1/1 | 1/1 | 1/1 | 0/1 | 0/0 | 1/1 | intergenic, MODIFIER NONE |                      | -1                  | ENSSSCG00000005502-ENSSSCG000000027  |                   |                 |                    | -1                |                 |                              |      |      |
| 2      | 8371729  |    | CCA | C      | 1468.89 |        | 210 | 0/0   | 0/1 | 0/1 | 1/1 | 1/1 | 1/1 | 0/1 | intergenic, MODIFIER NONE | n.null_nulldelCA     | -1                  | ZBTB3-TTC9C                          |                   |                 |                    | -1                |                 |                              |      |      |
| 2      | 19127176 |    | CT  | C      | 3059.78 |        | 258 | 0/0   | 0/0 | 0/0 | 1/1 | 1/1 | 1/1 | 0/1 | intergenic, MODIFIER NONE |                      | -1                  | TSPAN18-CD82                         |                   |                 |                    | -1                |                 |                              |      |      |
| 2      | 90267640 |    | A   | AAAAAC | 3886.24 |        | 216 | 0/0   | 0/1 | 0/1 | 0/1 | 0/1 | 0/0 | 0/0 | intergenic, MODIFIER NONE | n.null_nullinsAAAAAC | -1                  | ENSSSCG000000026098-ENSSSCG000000014 |                   |                 |                    | -1                |                 |                              |      |      |
| 2      | 4845229  |    | G   | T      | 1173.19 |        | 123 | 1/1   | 1/1 | 1/1 | 1/1 | 1/1 | 0/0 | 1/1 | upstream, MODIFIER NONE   | c.-134C>A            | -1                  | CTSF protein_coding                  |                   | ENSSSCT0        | -1                 |                   |                 |                              |      |      |
| 2      | 4845229  |    | G   | T      | 1173.19 |        | 123 | 1/1   | 1/1 | 1/1 | 1/1 | 1/1 | 0/0 | 1/1 | intergenic, MODIFIER NONE |                      | -1                  | CTSF-CCDC87                          |                   |                 |                    | -1                |                 |                              |      |      |
| 2      | 4933475  |    | G   | C      | 1296.18 |        | 157 | 1/1   | 1/1 | 1/1 | 1/1 | 1/1 | 0/0 | 1/1 | intron_vari MODIFIER NONE | c.892+27G>C          | -1                  | CTSF protein_coding                  |                   | ENSSSCT0        | 8                  |                   |                 |                              |      |      |
| 2      | 8870056  |    | G   | GTT    | 3275.88 |        | 172 | 1/1   | 0/1 | 1/1 | 1/1 | 1/1 | 0/0 | 1/1 | intron_vari MODIFIER NONE | c.992-2239_992-2238  | -1                  | ENSSSCG protein_coding               |                   | ENSSSCT0        | 4                  |                   |                 |                              |      |      |
| 2      | 29686631 |    | AC  | A      | 1116.53 |        | 156 | 1/1   | 1/1 | 1/1 | 1/1 | 1/1 | 0/0 | 1/1 | intron_vari MODIFIER NONE | c.4147-2633delC      | -1                  | KIAA1549I protein_coding             |                   | ENSSSCT0        | 13                 |                   |                 |                              |      |      |
| 2      | 29688931 |    | C   | CA     | 1888.12 |        | 196 | 1/1   | 1/1 | 1/1 | 1/1 | 1/1 | 0/0 | 1/1 | intron_vari MODIFIER NONE | c.4364+449_4364+45   | -1                  | KIAA1549I protein_coding             |                   | ENSSSCT0        | 14                 |                   |                 |                              |      |      |
| 2      | 48174967 |    | TAC | T      | 4304.16 |        | 240 | 1/1   | 1/1 | 1/1 | 1/1 | 1/1 | 0/0 | 1/1 | intron_vari MODIFIER NONE | c.-736+44382_-736+   | -1                  | SPON1 protein_coding                 |                   | ENSSSCT0        | 6                  |                   |                 |                              |      |      |
| 2      | 49365996 |    | TAG | T      | 4868.06 |        | 182 | 1/1   | 0/1 | 1/1 | 1/1 | 1/1 | 0/0 | 1/1 | intergenic, MODIFIER NONE | n.null_nulldelAG     | -1                  | BMAL1-ENSSSCG000000028546            |                   |                 |                    | -1                |                 |                              |      |      |
| 2      | 52136229 |    | GGT | G      | 4506.26 |        | 196 | 1/1   | 1/1 | 1/1 | 1/1 | 1/1 | 0/0 | 1/1 | intron_vari MODIFIER NONE | c.-3+5310_-3+5311d   | -1                  | MRV11 protein_coding                 |                   | ENSSSCT0        | 1                  |                   |                 |                              |      |      |
| 2      | 52256122 |    | TTG | T      | 5703.51 |        | 236 | 1/1   | 1/1 | 1/1 | 1/1 | 1/1 | 0/0 | 1/1 | intron_vari MODIFIER NONE | c.2168+4071_2168+4   | -1                  | MRV11 protein_coding                 |                   | ENSSSCT0        | 18                 |                   |                 |                              |      |      |
| 2      | 52910825 |    | AT  | A      | 2764.77 |        | 252 | 1/1   | 0/1 | 1/1 | 1/1 | 1/1 | 0/0 | 1/1 | intron_vari MODIFIER NONE | c.496-5566delT       | -1                  | ENSSSCG protein_coding               |                   | ENSSSCT0        | 4                  |                   |                 |                              |      |      |
| 2      | 54632899 |    | C   | T      | 1265.25 |        | 180 | 1/1   | 1/1 | 1/1 | 1/1 | 1/1 | 0/0 | 1/1 | intergenic, MODIFIER NONE |                      | -1                  | JMJD4-ENSSSCG000000024506            |                   |                 |                    | -1                |                 |                              |      |      |
| 2      | 55591681 |    | A   | G      | 1005.55 |        | 156 | 1/1   | 1/1 | 1/1 | 1/1 | 1/1 | 0/0 | 1/1 | intergenic, MODIFIER NONE |                      | -1                  | ENSSSCG000000025084-ENSSSCG000000028 |                   |                 |                    | -1                |                 |                              |      |      |
| 2      | 61255610 |    | G   | GT     | 2448.68 |        | 227 | 1/1   | 1/1 | 1/1 | 0/1 | 0/1 | 0/0 | 1/1 | intergenic, MODIFIER NONE | n.null_nullinsT      | -1                  | ENSSSCG000000013844-ENSSSCG000000013 |                   |                 |                    | -1                |                 |                              |      |      |
| 2      | 61714074 |    | A   | G      | 2278.19 |        | 161 | 1/1   | 1/1 | 1/1 | 0/1 | 0/1 | 0/0 | 1/1 | intergenic, MODIFIER NONE |                      | -1                  | CYP4F2-RASAL3                        |                   |                 |                    | -1                |                 |                              |      |      |
| 2      | 62994051 |    | T   | A      | 2127.2  |        | 239 | 1/1   | 1/1 | 1/1 | 1/1 | 0/1 | 0/0 | 1/1 | upstream, MODIFIER NONE   | c.-1T>A              | -1                  | ENSSSCG protein_coding               |                   | ENSSSCT0        | -1                 |                   |                 |                              |      |      |
| 2      | 62994051 |    | T   | A      | 2127.2  |        | 239 | 1/1   | 1/1 | 1/1 | 0/1 | 0/1 | 0/0 | 1/1 | intergenic, MODIFIER NONE |                      | -1                  | ENSSSCG000000013811-ENSSSCG000000013 |                   |                 |                    | -1                |                 |                              |      |      |
| 2      | 63077973 |    | G   | T      | 1013.9  |        | 161 | 1/1   | 1/1 | 1/1 | 0/1 | 0/0 | 0/0 | 1/1 | intergenic, MODIFIER NONE |                      | -1                  | ENSSSCG000000013810-ENSSSCG000000013 |                   |                 |                    | -1                |                 |                              |      |      |
| 2      | 72365504 |    | A   | C      | 1300.74 |        | 141 | 1/1   | 1/1 | 1/1 | 1/1 | 0/1 | 0/0 | 1/1 | intergenic, MODIFIER NONE |                      | -1                  | ENSSSCG000000013566-INSR             |                   |                 |                    | -1                |                 |                              |      |      |
| 2      | 72699689 |    | C   | G      | 2618.15 |        | 785 | 1/1   | 1/1 | 1/1 | 1/1 | 0/1 | 0/0 | 1/1 | missense, MODERAT NONE    | c.142C>G p.Arg48Gln  | 807                 | EMR1 protein_coding                  |                   | ENSSSCT0        | 1                  |                   |                 |                              |      |      |
| 2      | 72699689 |    | C   | G      | 2618.15 |        | 785 | 1/1   | 1/1 | 1/1 | 1/1 | 0/1 | 0/0 | 1/1 | upstream, MODIFIER NONE   | c.-1G>C              | -1                  | ENSSSCG protein_coding               |                   | ENSSSCT0        | -1                 |                   |                 |                              |      |      |
| 2      | 88881240 |    | T   | C      | 1672.9  |        | 179 | 1/1   | 1/1 | 1/1 | 0/1 | 0/1 | 0/0 | 1/1 | intron_vari MODIFIER NONE | c.-207+1926T>C       | -1                  | ENSSSCG protein_coding               |                   | ENSSSCT0        | 1                  |                   |                 |                              |      |      |
| 2      | 1.61E+08 |    | A   | C      | 1869.56 |        | 125 | 1/1   | 1/1 | 1/1 | 1/1 | 1/1 | 0/0 | 1/1 | intergenic, MODIFIER NONE |                      | -1                  | ENSSSCG000000028286-ENSSSCG000000025 |                   |                 |                    | -1                |                 |                              |      |      |
| 2      | 1.61E+08 |    | AT  | A      | 3070.32 |        | 222 | 1/1   | 1/1 | 1/1 | 1/1 | 1/1 | 0/0 | 1/1 | intergenic, MODIFIER NONE |                      | -1                  | ENSSSCG000000021614-ENSSSCG000000027 |                   |                 |                    | -1                |                 |                              |      |      |
| 3      | 52550229 |    | T   | C      | 1559.23 |        | 143 | 0/0   | 0/1 | 0/1 | 1/1 | 1/1 | 1/1 | 0/1 | intergenic, MODIFIER NONE |                      | -1                  | MRP59-ENSSSCG000000026126            |                   |                 |                    | -1                |                 |                              |      |      |
| 3      | 52550244 |    | T   | C      | 1518.25 |        | 143 | 0/0   | 0/1 | 0/1 | 1/1 | 1/1 | 1/1 | 0/1 | intergenic, MODIFIER NONE |                      | -1                  | MRP59-ENSSSCG000000026126            |                   |                 |                    | -1                |                 |                              |      |      |
| 3      | 54769594 |    | A   | G      | 1046.19 |        | 168 | 0/0   | 0/1 | 0/1 | 1/1 | 1/1 | 1/1 | 0/1 | intergenic, MODIFIER NONE |                      | -1                  | IL1R1-ENSSSCG000000028331            |                   |                 |                    | -1                |                 |                              |      |      |
| 3      | 55829690 |    | T   | C      | 1156.22 |        | 161 | 0/0   | 0/1 | 0/1 | 1/1 | 1/1 | 1/1 | 0/1 | intron_vari MODIFIER NONE | c.*33+6539A>G        | -1                  | RPL31 protein_coding                 |                   | ENSSSCT0        | 4                  |                   |                 |                              |      |      |
| 3      | 55829690 |    | T   | C      | 1156.22 |        | 161 | 0/0   | 0/1 | 0/1 | 1/1 | 1/1 | 1/1 | 0/1 | intron_vari MODIFIER NONE | c.2549-2990T>C       | -1                  | TBC1D8 protein_coding                |                   | ENSSSCT0        | 15                 |                   |                 |                              |      |      |
| 3      | 1386148  |    | T   | TG     | 3196.14 |        | 235 | 1/1   | 1/1 | 1/1 | 1/1 | 1/1 | 0/0 | 1/1 | intergenic, MODIFIER NONE | n.null_nullinsG      | -1                  | ENSSSCG000000027961-ELFN1            |                   |                 |                    | -1                |                 |                              |      |      |
| 3      | 4447954  |    | A   | G      | 1263.86 |        | 122 | 1/1   | 1/1 | 1/1 | 1/1 | 1/1 | 0/0 | 1/1 | intergenic, MODIFIER NONE |                      | -1                  | MMD2-WPI2                            |                   |                 |                    | -1                |                 |                              |      |      |
| 3      | 14687749 |    | G   | A      | 1302.61 |        | 143 | 1/1   | 1/1 | 1/1 | 1/1 | 1/1 | 0/0 | 1/1 | intergenic, MODIFIER NONE |                      | -1                  | U6-ENSSSCG000000007727               |                   |                 |                    | -1                |                 |                              |      |      |
| 3      | 38056015 |    | C   | T      | 1094.51 |        | 127 | 1/1   | 1/1 | 1/1 | 1/1 | 1/1 | 0/0 | 1/1 | intergenic, MODIFIER NONE |                      | -1                  | U6-U6                                |                   |                 | </                 |                   |                 |                              |      |      |

|   |          |        |     |         |      |     |     |     |     |     |     |     |                           |                     |                                      |             |
|---|----------|--------|-----|---------|------|-----|-----|-----|-----|-----|-----|-----|---------------------------|---------------------|--------------------------------------|-------------|
| 3 | 1.42E+08 | T      | G   | 4161.94 | 1151 | 1/1 | 1/1 | 1/1 | 0/1 | 0/1 | 0/0 | 0/1 | intergenic, MODIFIER NONE | -1                  | ACP1-ENSSSCG00000008661              | -1          |
| 3 | 1.42E+08 | C      | G   | 7956.76 | 2096 | 1/1 | 1/1 | 1/1 | 1/1 | 1/1 | 0/0 | 1/1 | intergenic, MODIFIER NONE | -1                  | ACP1-ENSSSCG00000008661              | -1          |
| 4 | 4068921  | T      | TG  | 1661.78 | 218  | 0/0 | 0/1 | 0/1 | 0/1 | 1/1 | 1/1 | 1/1 | intergenic, MODIFIER NONE | n.null_nullinsG     | ENSSSCG00000005938-5S_rRNA           | -1          |
| 4 | 20598904 | C      | CT  | 1482.44 | 258  | 0/0 | 0/1 | 0/0 | 0/1 | 0/1 | 1/1 | 1/1 | intergenic, MODIFIER NONE | n.null_nullinsT     | NOV-MAL2                             | -1          |
| 4 | 43291944 | CAAAAA | C   | 3569.67 | 156  | 0/0 | 0/1 | 0/1 | 0/1 | 0/1 | 1/1 | 1/1 | intergenic, MODIFIER NONE | n.null_nulldelAAAAA | SDC2-PTDSS1                          | -1          |
| 4 | 74051994 | T      | C   | 1357.71 | 165  | 0/0 | 0/1 | 0/1 | 1/1 | 1/1 | 1/1 | 1/1 | intergenic, MODIFIER NONE | -1                  | ENSSSCG00000006206-ENSSSCG000000023  | -1          |
| 4 | 74052001 | T      | C   | 1158.98 | 164  | 0/0 | 0/1 | 0/1 | 1/1 | 1/1 | 1/1 | 1/1 | intergenic, MODIFIER NONE | -1                  | ENSSSCG00000006206-ENSSSCG000000023  | -1          |
| 4 | 84082675 | GA     | G   | 3538.89 | 265  | 0/0 | 0/0 | 0/1 | 1/1 | 1/1 | 1/1 | 1/1 | intergenic, MODIFIER NONE | -1                  | SOX17-MRPL15                         | -1          |
| 4 | 86371133 | A      | G   | 1238.81 | 164  | 0/0 | 0/1 | 0/1 | 1/1 | 1/1 | 1/1 | 1/1 | intergenic, MODIFIER NONE | -1                  | PCMTD1-SNAI2                         | -1          |
| 4 | 1.3E+08  | GA     | G   | 1112.08 | 164  | 0/0 | 0/1 | 0/1 | 0/1 | 0/1 | 1/1 | 1/1 | intergenic, MODIFIER NONE | -1                  | ENSSSCG00000006870-SLC35A3           | -1          |
| 4 | 9067293  | T      | C   | 1436.02 | 152  | 1/1 | 0/1 | 0/1 | 0/1 | 1/1 | 0/0 | 1/1 | intron_vari MODIFIER NONE | c.112+516T>C        | OC90 protein_coding                  | ENSSSCT0 1  |
| 4 | 9067304  | A      | G   | 1354.02 | 149  | 1/1 | 0/1 | 0/1 | 1/1 | 1/1 | 0/0 | 1/1 | intron_vari MODIFIER NONE | c.112+527A>G        | OC90 protein_coding                  | ENSSSCT0 1  |
| 4 | 24018739 | A      | G   | 1974.22 | 127  | 1/1 | 1/1 | 1/1 | 0/1 | 0/1 | 0/0 | .   | intergenic, MODIFIER NONE | -1                  | SNORA31-TRPS1                        | -1          |
| 4 | 33362195 | T      | TA  | 2516.62 | 245  | 1/1 | 0/1 | 1/1 | 0/1 | 0/1 | 0/0 | 1/1 | intergenic, MODIFIER NONE | n.null_nullinsA     | ABRA-ENSSSCG00000006037              | -1          |
| 4 | 38937181 | CAA    | C   | 2837.04 | 168  | 1/1 | 1/1 | 1/1 | 1/1 | 1/1 | 0/0 | 1/1 | intron_vari MODIFIER NONE | c.428-391_428-390de | YWHAZ protein_coding                 | ENSSSCT0 3  |
| 4 | 39097076 | A      | AC  | 2577.95 | 157  | 1/1 | 1/1 | 1/1 | 1/1 | 1/1 | 0/0 | 0/1 | intergenic, MODIFIER NONE | n.null_nullinsC     | YWHAZ-PABPC1                         | -1          |
| 4 | 1.23E+08 | T      | TAA | 1208.17 | 201  | 1/1 | 1/1 | 0/1 | 1/1 | 0/1 | 0/0 | 0/1 | intergenic, MODIFIER NONE | n.null_nullinsAA    | NTNG1-ENSSSCG00000006853             | -1          |
| 4 | 1.42E+08 | G      | A   | 2361.39 | 152  | 1/1 | 1/1 | 1/1 | 1/1 | 0/0 | 1/1 | 1/1 | intergenic, MODIFIER NONE | -1                  | ODF2L-ZNHIT6                         | -1          |
| 5 | 9089370  | C      | CT  | 2230.04 | 216  | 0/0 | 0/0 | 0/0 | 1/1 | 1/1 | 1/1 | 1/1 | intron_vari MODIFIER NONE | c.3101-81_3101-80in | MYH9 protein_coding                  | ENSSSCT0 24 |
| 5 | 74973826 | G      | GC  | 1277.73 | 152  | 1/1 | 1/1 | 1/1 | 0/1 | 0/1 | 0/0 | 1/1 | intron_vari MODIFIER NONE | c.-128-43159_-128-4 | ENSSSCG protein_coding               | ENSSSCT0 1  |
| 6 | 2338761  | T      | C   | 1084.1  | 129  | 0/0 | 0/1 | 0/1 | 1/1 | 1/1 | 1/1 | 0/1 | intergenic, MODIFIER NONE | -1                  | C16orf95-FOXL1                       | -1          |
| 6 | 3432569  | C      | G   | 1130.18 | 137  | 0/0 | 0/1 | 0/1 | 1/1 | 1/1 | 1/1 | 0/1 | intergenic, MODIFIER NONE | -1                  | MTHFSD-COX4I1                        | -1          |
| 6 | 17071811 | A      | C   | 1049.52 | 1905 | 0/0 | 0/1 | 0/1 | 1/1 | 1/1 | 1/1 | 1/1 | intergenic, MODIFIER NONE | -1                  | CDH3-RSPRY1                          | -1          |
| 6 | 29037648 | A      | G   | 1211.43 | 115  | 0/0 | 0/1 | 0/1 | 1/1 | 1/1 | 1/1 | 1/1 | intergenic, MODIFIER NONE | -1                  | ENSSSCG00000002834-TOX3              | -1          |
| 6 | 31093904 | A      | G   | 1081.53 | 127  | 0/0 | 0/1 | 0/1 | 1/1 | 1/1 | 1/1 | 1/1 | intergenic, MODIFIER NONE | -1                  | ZNF423-N4BP1                         | -1          |
| 6 | 59974516 | T      | C   | 1514.54 | 134  | 0/0 | 0/1 | 0/1 | 1/1 | 1/1 | 1/1 | 1/1 | intergenic, MODIFIER NONE | -1                  | ENSSSCG00000003361-C1orf174          | -1          |
| 6 | 78665344 | GA     | G   | 1779.58 | 202  | 0/0 | 0/0 | 0/1 | 0/1 | 0/1 | 1/1 | 1/1 | intron_vari MODIFIER NONE | c.572-1071delT      | EYA3 protein_coding                  | ENSSSCT0 4  |
| 6 | 84569119 | CG     | C   | 3720.18 | 245  | 0/0 | 0/0 | 0/1 | 0/1 | 0/1 | 1/1 | 1/1 | intergenic, MODIFIER NONE | -1                  | C1orf94-ENSSSCG00000003624           | -1          |
| 6 | 1.41E+08 | TA     | T   | 1028.28 | 233  | 0/0 | 0/1 | 0/1 | 0/0 | 0/1 | 1/1 | 0/1 | intergenic, MODIFIER NONE | -1                  | ENSSSCG00000003828-JUN               | -1          |
| 6 | 1.38E+08 | T      | C   | 1602.12 | 143  | 1/1 | 1/1 | 1/1 | 1/1 | 1/1 | 0/0 | 1/1 | intergenic, MODIFIER NONE | -1                  | ATG4C-U6                             | -1          |
| 6 | 1.38E+08 | C      | A   | 1521.16 | 143  | 1/1 | 1/1 | 1/1 | 1/1 | 1/1 | 0/0 | 1/1 | intergenic, MODIFIER NONE | -1                  | ATG4C-U6                             | -1          |
| 6 | 1.39E+08 | C      | T   | 1150.3  | 110  | 1/1 | 1/1 | 1/1 | 1/1 | 1/1 | 0/0 | 1/1 | intergenic, MODIFIER NONE | -1                  | KANK4-ENSSSCG000000023243            | -1          |
| 6 | 1.43E+08 | C      | T   | 1529.39 | 746  | 1/1 | 1/1 | 1/1 | .   | 1/1 | 0/0 | 0/1 | intergenic, MODIFIER NONE | -1                  | C8A-C1orf168                         | -1          |
| 6 | 1.43E+08 | T      | A   | 2840.78 | 4248 | 1/1 | 1/1 | 0/1 | 0/1 | 0/1 | 0/0 | 0/1 | intergenic, MODIFIER NONE | -1                  | C8A-C1orf168                         | -1          |
| 7 | 928362   | C      | A   | 1608.58 | 179  | 1/1 | 1/1 | 1/1 | 1/1 | 1/1 | 0/0 | 0/1 | intergenic, MODIFIER NONE | -1                  | FOXF2-GMDS                           | -1          |
| 7 | 2367332  | G      | A   | 1205.12 | 154  | 1/1 | 1/1 | 1/1 | 1/1 | 1/1 | 0/0 | 1/1 | upstream, MODIFIER NONE   | c.-1G>A             | FAM50B protein_coding                | ENSSSCT0 -1 |
| 7 | 2367332  | G      | A   | 1205.12 | 154  | 1/1 | 1/1 | 1/1 | 1/1 | 1/1 | 0/0 | 1/1 | intergenic, MODIFIER NONE | -1                  | PXDC1-FAM50B                         | -1          |
| 7 | 2596504  | C      | A   | 1974.76 | 164  | 1/1 | 1/1 | 1/1 | 1/1 | 1/1 | 0/0 | 1/1 | intergenic, MODIFIER NONE | -1                  | ECI2-ENSSSCG00000000999              | -1          |
| 7 | 30643829 | G      | T   | 1988.1  | 143  | 1/1 | 1/1 | 1/1 | 1/1 | 1/1 | 0/0 | 0/1 | intergenic, MODIFIER NONE | -1                  | FAM83B-ENSSSCG00000001484            | -1          |
| 7 | 30836318 | T      | C   | 1117.74 | 143  | 1/1 | 1/1 | 1/1 | 1/1 | 1/1 | 0/0 | 1/1 | intergenic, MODIFIER NONE | -1                  | FAM83B-ENSSSCG00000001484            | -1          |
| 7 | 31064626 | C      | T   | 1176.17 | 138  | 1/1 | 1/1 | 1/1 | 1/1 | 1/1 | 0/0 | 0/1 | intergenic, MODIFIER NONE | -1                  | ENSSSCG000000001484-ENSSSCG000000001 | -1          |
| 7 | 32893934 | C      | T   | 1130.01 | 176  | 1/1 | 1/1 | 1/1 | 1/1 | 1/1 | 0/0 | 0/1 | intron_vari MODIFIER NONE | c.694-15474G>A      | ENSSSCG protein_coding               | ENSSSCT0 7  |
| 7 | 33452094 | A      | G   | 2162.6  | 159  | 1/1 | 1/1 | 1/1 | 1/1 | 1/1 | 0/0 | 0/1 | intergenic, MODIFIER NONE | -1                  | ENSSSCG00000025172-DST               | -1          |
| 7 | 38316792 | A      | G   | 1346.47 | 140  | 1/1 | 1/1 | 1/1 | 1/1 | 1/1 | 0/0 | 1/1 | intergenic, MODIFIER NONE | -1                  | ENSSSCG00000001583-ENSSSCG000000001  | -1          |
| 7 | 47277517 | G      | A   | 1624.89 | 108  | 1/1 | 1/1 | 1/1 | 1/1 | 1/1 | 0/0 | 1/1 | upstream, MODIFIER NONE   | c.-428C>T           | ENPP4 protein_coding                 | ENSSSCT0 -1 |
| 7 | 47277517 | G      | A   | 1624.89 | 108  | 1/1 | 1/1 | 1/1 | 1/1 | 1/1 | 0/0 | 1/1 | intergenic, MODIFIER NONE | -1                  | ENPP4-RCAN2                          | -1          |
| 8 | 21945384 | T      | C   | 1257.37 | 140  | 0/0 | 0/1 | 1/1 | 1/1 | 1/1 | 1/1 | 1/1 | intergenic, MODIFIER NONE | -1                  | 7SK-ENSSSCG000000008763              | -1          |
| 8 | 23009229 | CG     | C   | 1080.68 | 241  | 0/0 | 0/0 | 0/0 | 1/1 | 1/1 | 1/1 | 1/1 | intergenic, MODIFIER NONE | -1                  | ENSSSCG00000008763-PCDH7             | -1          |
| 8 | 26874123 | A      | C   | 1342.97 | 136  | 0/0 | 0/1 | 0/1 | 1/1 | 1/1 | 1/1 | 1/1 | intergenic, MODIFIER NONE | -1                  | PCDH7-ENSSSCG00000008767             | -1          |
| 8 | 33762665 | GT     | G   | 1159.43 | 216  | 0/0 | 1/1 | 1/1 | 1/1 | 1/1 | 1/1 | 0/1 | intergenic, MODIFIER NONE | -1                  | NSUN7-U6                             | -1          |
| 8 | 39555553 | T      | TTA | 4723.47 | 227  | 0/0 | 0/0 | 0/0 | 1/1 | 1/1 | 1/1 | 1/1 | intron_vari MODIFIER NONE | c.2411+1756_2411+1  | CORIN protein_coding                 | ENSSSCT0 16 |
| 8 | 45200463 | CT     | C   | 2816.01 | 228  | 0/0 | 0/1 | 0/0 | 0/1 | 1/1 | 1/1 | 1/1 | intergenic, MODIFIER NONE | -1                  | ENSSSCG000000024269-CPE              | -1          |
| 8 | 87464621 | G      | C   | 1468.37 | 178  | 1/1 | 1/1 | 1/1 | 1/1 | 1/1 | 0/0 | 0/1 | intron_vari MODIFIER NONE | c.397-24591G>C      | SLC10A7 protein_coding               | ENSSSCT0 4  |
| 8 | 91243682 | G      | A   | 1121.08 | 157  | 1/1 | 1/1 | 1/1 | 1/1 | 1/1 | 0/0 | 0/1 | intergenic, MODIFIER NONE | -1                  | IL15-ENSSSCG00000009052              | -1          |
| 8 | 91357497 | T      | C   | 1793.91 | 153  | 1/1 | 1/1 | 1/1 | 1/1 | 1/1 | 0/0 | 0/1 | intergenic, MODIFIER NONE | -1                  | ENSSSCG00000009052-RNF150            | -1          |
| 8 | 91374454 | T      | A   | 1591.76 | 160  | 1/1 | 1/1 | 1/1 | 1/1 | 1/1 | 0/0 | 0/1 | intergenic, MODIFIER NONE | -1                  | ENSSSCG00000009052-RNF150            | -1          |
| 8 | 92971857 | C      | T   | 1650.73 | 174  | 1/1 | 1/1 | 1/1 | 1/1 | 1/1 | 0/0 | 0/1 | intergenic, MODIFIER NONE | -1                  | MGST2-RAB33B                         | -1          |
| 8 | 1.17E+08 | T      | C   | 1702.7  | 161  | 1/1 | 1/1 | 1/1 | 1/1 | 1/1 | 0/0 | 0/1 | intergenic, MODIFIER NONE | -1                  | ENSSSCG00000021844-AR5J              | -1          |
| 8 | 1.22E+08 | A      | AT  | 3506.92 | 224  | 1/1 | 1/1 | 1/1 | 1/1 | 1/1 | 0/0 | 1/1 | intergenic, MODIFIER NONE | n.null_nullinsT     | RPL34-LF1                            | -1          |
| 8 | 1.24E+08 | CAA    | C   | 2250.3  | 127  | 1/1 | 1/1 | 1/1 | 1/1 | 1/1 | 0/0 | 1/1 | upstream, MODIFIER NONE   | c.-3_-3delTT        | ENSSSCG protein_coding               | ENSSSCT0 -1 |
| 8 | 1.24E+08 | CAA    | C   | 2250.3  | 127  | 1/1 | 1/1 | 1/1 | 1/1 | 1/1 | 0/0 | 1/1 | intergenic, MODIFIER NONE | n.null_nulldelAA    | ENSSSCG00000020821-ENSSSCG000000023  | -1          |
| 8 | 1.3E+08  | GCCAA  | G   | 6249    | 148  | 1/1 | 1/1 | 1/1 | 1/1 | 1/1 | 0/0 | 1/1 | intergenic, MODIFIER NONE | n.null_nulldelCCAA  | ENSSSCG000000030522-ADH4             | -1          |
| 8 | 1.31E+08 | G      | T   | 7800.54 | 259  | 1/1 | 1/1 | 1/1 | 1/1 | 1/1 | 0/0 | 1/1 | intron_vari MODIFIER NONE | c.167-3261C>A       | METAP1 protein_coding                | ENSSSCT0 2  |
| 8 | 1.31E+08 | TC     | T   | 5375.14 | 222  | 1/1 | 1/1 | 1/1 | 1/1 | 1/1 | 0/0 | 1/1 | intron_vari MODIFIER NONE | c.81+24560delC      | TSPAN5 protein_coding                | ENSSSCT0 1  |
| 8 | 1.32E+08 | T      | C   | 1077.01 | 179  | 1/1 | 1/1 | 1/1 | 1/1 | 1/1 | 0/0 | 1/1 | intergenic, MODIFIER NONE | -1                  | U6-ENSSSCG000000019832               | -1          |
| 8 | 1.38E+08 | A      | AT  | 3608.97 | 249  | 1/1 | 1/1 | 1/1 | 0/1 | 0/1 | 0/0 | 1/1 | intergenic, MODIFIER NONE | n.null_nullinsT     | ENSSSCG00000029197-ENSSSCG000000022  | -1          |
| 8 | 1.41E+08 | T      | C   | 6968.53 | 375  | 1/1 | 1/1 | 1/1 | 1/1 | 1/1 | 0/0 | 0/1 | intron_vari MODIFIER NONE | c.6358-1846A>G      | PTPN13 protein_coding                | ENSSSCT0 40 |

|    |          |         |         |          |      |     |     |     |     |     |     |     |                           |                           |                                     |                          |    |
|----|----------|---------|---------|----------|------|-----|-----|-----|-----|-----|-----|-----|---------------------------|---------------------------|-------------------------------------|--------------------------|----|
| 9  | 4683739  | A       | G       | 1065.02  | 152  | 0/0 | 1/1 | 0/1 | 1/1 | 1/1 | 1/1 | 1/1 | intergenic, MODIFIER NONE | -1                        | ENSSSCG00000014673-TRIM6            | -1                       |    |
| 9  | 55718387 | A       | G       | 1027.08  | 160  | 0/0 | 0/1 | 0/1 | 1/1 | 1/1 | 1/1 | 0/1 | intergenic, MODIFIER NONE | -1                        | ENSSSCG00000015140-ENSSSCG000000015 | -1                       |    |
| 9  | 55737157 | G       | T       | 1022.89  | 124  | 0/0 | 0/1 | 0/1 | 1/1 | 1/1 | 1/1 | 1/1 | intergenic, MODIFIER NONE | -1                        | ENSSSCG00000015140-ENSSSCG000000015 | -1                       |    |
| 9  | 56254834 | T       | A       | 2035.29  | 138  | 0/0 | 0/1 | 0/1 | 1/1 | 1/1 | 1/1 | 1/1 | intergenic, MODIFIER NONE | -1                        | ENSSSCG00000015162-ENSSSCG000000025 | -1                       |    |
| 9  | 58075484 | G       | A       | 1752.15  | 167  | 0/0 | 0/1 | 0/1 | 1/1 | 1/1 | 1/1 | 0/1 | intergenic, MODIFIER NONE | -1                        | TMEM218-ENSSSCG00000015211          | -1                       |    |
| 9  | 1.21E+08 | C       | T       | 1271.49  | 387  | 0/0 | 0/0 | 0/0 | 0/1 | 0/0 | 1/1 | 0/1 | intergenic, MODIFIER NONE | -1                        | ENSSSCG00000015458-ENSSSCG000000029 | -1                       |    |
| 9  | 13168406 | T       | A       | 1163.88  | 108  | 1/1 | 1/1 | 1/1 | 1/1 | 1/1 | 0/0 | 0/1 | intergenic, MODIFIER NONE | -1                        | PAK1-AQP11                          | -1                       |    |
| 9  | 29131911 | T       | C       | 1176.04  | 149  | 1/1 | 1/1 | 1/1 | 1/1 | 1/1 | 0/0 | 0/0 | intron_vari MODIFIER NONE | c.-26-1780T>C             | ENSSSCG protein_coding              | ENSSSCTO 2               |    |
| 9  | 30818604 | A       | C       | 1332.26  | 114  | 1/1 | 1/1 | 1/1 | 1/1 | 1/1 | 0/0 | 1/1 | intergenic, MODIFIER NONE | -1                        | CWC15-ENSSSCG00000026272            | -1                       |    |
| 9  | 31130725 | A       | G       | 1917.95  | 155  | 1/1 | 1/1 | 1/1 | 1/1 | 1/1 | 0/0 | 1/1 | intergenic, MODIFIER NONE | -1                        | SESN3-FAM76B                        | -1                       |    |
| 9  | 31755919 | C       | T       | 1068.21  | 106  | 1/1 | 1/1 | 1/1 | 1/1 | 1/1 | 0/0 | 1/1 | intergenic, MODIFIER NONE | -1                        | FAM76B-ENSSSCG00000014969           | -1                       |    |
| 9  | 31755935 | T       | C       | 1313.43  | 125  | 1/1 | 1/1 | 1/1 | 1/1 | 1/1 | 0/0 | 1/1 | intergenic, MODIFIER NONE | -1                        | FAM76B-ENSSSCG00000014969           | -1                       |    |
| 9  | 42511529 | A       | T       | 1967.82  | 131  | 1/1 | 1/1 | 1/1 | 1/1 | 1/1 | 0/0 | 1/1 | intergenic, MODIFIER NONE | -1                        | C11orf87-U1                         | -1                       |    |
| 9  | 62639271 | TA      | T       | 1317.69  | 202  | 1/1 | 1/1 | 1/1 | 1/1 | 0/1 | 0/1 | 0/0 | intergenic, MODIFIER NONE | -1                        | BARX2-SNORD112                      | -1                       |    |
| 9  | 69870502 | G       | A       | 1351.32  | 161  | 1/1 | 1/1 | 1/1 | 1/1 | 1/1 | 0/0 | 0/1 | intron_vari MODIFIER NONE | c.454-982G>A              | ENSSSCG protein_coding              | ENSSSCTO 5               |    |
| 9  | 1.29E+08 | TGG     | T       | 3976.49  | 254  | 1/1 | 0/1 | 1/1 | 1/1 | 0/1 | 0/0 | 1/1 | intron_vari MODIFIER NONE | c.3702+645_3702+64        | TNN protein_coding                  | ENSSSCTO 32              |    |
| 9  | 1.32E+08 | GG      | A       | 1324.62  | 144  | 1/1 | 1/1 | 1/1 | 1/1 | 1/1 | 0/0 | 1/1 | intron_vari MODIFIER NONE | c.-72+17526G>A            | RASAL2 protein_coding               | ENSSSCTO 3               |    |
| 9  | 1.38E+08 | C       | A       | 1258.36  | 107  | 1/1 | 1/1 | 1/1 | 1/1 | 1/1 | 0/0 | 1/1 | intergenic, MODIFIER NONE | -1                        | C1orf21-EDEM3                       | -1                       |    |
| 10 | 64031898 | A       | G       | 1811.04  | 138  | 0/0 | 0/1 | 0/1 | 1/1 | 1/1 | 1/1 | 1/1 | intergenic, MODIFIER NONE | -1                        | GJD4-CCDC3                          | -1                       |    |
| 10 | 68794575 | TA      | T       | 1852.33  | 242  | 0/0 | 0/0 | 0/1 | 0/1 | 0/1 | 1/1 | 0/1 | intergenic, MODIFIER NONE | -1                        | U6-ENSSSCG00000029177               | -1                       |    |
| 10 | 70261400 | A       | G       | 1621.14  | 168  | 0/0 | 0/1 | 0/1 | 0/1 | 0/1 | 1/1 | 0/1 | intergenic, MODIFIER NONE | -1                        | U6-ENSSSCG00000018589               | -1                       |    |
| 11 | 14944055 | A       | G       | 1973     | 162  | 0/0 | 0/1 | 0/1 | 0/1 | 0/1 | 1/1 | 0/1 | intergenic, MODIFIER NONE | -1                        | COG6-FOXO1                          | -1                       |    |
| 11 | 82268654 | AGTTGAG | A       | 1244.06  | 239  | 0/0 | 0/0 | 0/0 | 0/1 | 0/1 | 1/1 | 0/1 | intergenic, MODIFIER NONE | n.null_nulldelGTTGAG      | FAM155A-ENSSSCG00000009539          | -1                       |    |
| 11 | 1887438  | AAAAT   | A       | 3256.31  | 223  | 1/1 | 1/1 | 1/1 | 1/1 | 0/1 | 0/1 | 0/0 | intron_vari MODIFIER NONE | c.446-14128_446-141       | TNFRSF19 protein_coding             | ENSSSCTO 5               |    |
| 11 | 2234773  | T       | C       | 1143.95  | 132  | 1/1 | 0/0 | 0/1 | 1/1 | 1/1 | 0/0 | 1/1 | intron_vari MODIFIER NONE | c.55+21048A>G             | ENSSSCG protein_coding              | ENSSSCTO 1               |    |
| 11 | 35390104 | G       | A       | 1331.53  | 130  | 1/1 | 1/1 | 1/1 | 1/1 | 1/1 | 0/0 | 0/1 | intergenic, MODIFIER NONE | -1                        | ENSSSCG00000009449-SNORA31          | -1                       |    |
| 12 | 7432755  | G       | A       | 1239.5   | 134  | 1/1 | 1/1 | 1/1 | 1/1 | 1/1 | 0/0 | 1/1 | intergenic, MODIFIER NONE | -1                        | RPL38-SDK2                          | -1                       |    |
| 12 | 7432764  | G       | A       | 1367.47  | 138  | 1/1 | 1/1 | 1/1 | 1/1 | 1/1 | 0/0 | 1/1 | intergenic, MODIFIER NONE | -1                        | RPL38-SDK2                          | -1                       |    |
| 12 | 8693471  | C       | G       | 1468.74  | 153  | 1/1 | 1/1 | 1/1 | 1/1 | 1/1 | 0/0 | 1/1 | intergenic, MODIFIER NONE | -1                        | SLC39A11-SOX9                       | -1                       |    |
| 12 | 22828565 | T       | C       | 1095.34  | 137  | 1/1 | 1/1 | 1/1 | 1/1 | 1/1 | 0/0 | 0/0 | intron_vari MODIFIER NONE | c.707-168A>G              | ENSSSCG protein_coding              | ENSSSCTO 5               |    |
| 12 | 22835615 | T       | C       | 1668.93  | 129  | 1/1 | 1/1 | 1/1 | 1/1 | 1/1 | 0/0 | 1/1 | upstream_ MODIFIER NONE   | c.-1A>G                   | ENSSSCG protein_coding              | ENSSSCTO -1              |    |
| 12 | 22835615 | T       | C       | 1668.93  | 129  | 1/1 | 1/1 | 1/1 | 1/1 | 1/1 | 0/0 | 1/1 | intergenic, MODIFIER NONE | -1                        | ENSSSCG00000017490-ENSSSCG000000017 | -1                       |    |
| 12 | 48947845 | A       | T       | 3669.6   | 5516 | 1/1 | 0/1 | 0/1 | 0/1 | 0/1 | 0/0 | 0/1 | intergenic, MODIFIER NONE | -1                        | U6-ABR                              | -1                       |    |
| 13 | 403773   | C       | CA      | 3243.74  | 202  | 0/0 | 0/0 | 0/1 | 1/1 | 1/1 | 1/1 | 1/1 | intron_vari MODIFIER NONE | c.180+44121_180+44        | ENSSSCG protein_coding              | ENSSSCTO 1               |    |
| 13 | 1.34E+08 | G       | A       | 1307.6   | 143  | 0/0 | 0/1 | 0/1 | 1/1 | 1/1 | 1/1 | 0/1 | intergenic, MODIFIER NONE | -1                        | RFC4-MASP1                          | -1                       |    |
| 13 | 1.87E+08 | G       | GA      | 1764.93  | 238  | 0/0 | 0/1 | 0/1 | 1/1 | 1/1 | 1/1 | 1/1 | intergenic, MODIFIER NONE | n.null_nullinsA           | ROBO1-ENSSSCG00000012002            | -1                       |    |
| 13 | 2.15E+08 | C       | CGGGAGA | 10414.89 | 225  | 0/0 | 0/1 | 0/1 | 1/1 | 1/1 | 1/1 | 0/1 | intergenic, MODIFIER NONE | n.null_nullinsGGGAG/-     | ENSSSCG00000012078-ENSSSCG000000012 | -1                       |    |
| 13 | 7733142  | C       | G       | 1113.12  | 147  | 1/1 | 1/1 | 1/1 | 0/1 | 0/1 | 0/0 | 0/1 | intron_vari MODIFIER NONE | c.825+4020C>G             | EFHB protein_coding                 | ENSSSCTO 1               |    |
| 13 | 14327965 | A       | G       | 4440.15  | 283  | 1/1 | 1/1 | 1/1 | 1/1 | 0/1 | 0/0 | 0/1 | intergenic, MODIFIER NONE | -1                        | OXSM-LRRC3B                         | -1                       |    |
| 13 | 1.14E+08 | TTA     | T       | 2637.19  | 178  | 1/1 | 0/1 | 1/1 | 0/1 | 1/1 | 0/0 | 1/1 | intergenic, MODIFIER NONE | n.null_nulldelTA          | BCHE-ZBBX                           | -1                       |    |
| 14 | 11250816 | G       | T       | 1477.15  | 177  | 0/0 | 1/1 | 1/1 | 0/1 | 0/1 | 1/1 | 1/1 | intergenic, MODIFIER NONE | -1                        | ENSSSCG00000009655-PPP2R2A          | -1                       |    |
| 14 | 12224629 | C       | CAT     | 1782.1   | 244  | 0/0 | 0/1 | 0/1 | 0/1 | 0/1 | 1/1 | 0/1 | intron_vari MODIFIER NONE | c.436-3030_436-3029       | TRIM35 protein_coding               | ENSSSCTO 1               |    |
| 14 | 62454044 | GT      | G       | 2509.49  | 237  | 0/0 | 0/1 | 1/1 | 1/1 | 1/1 | 1/1 | 0/1 | intron_vari MODIFIER NONE | c.3350+733delA            | SIPAL12 protein_coding              | ENSSSCTO 11              |    |
| 14 | 10921916 | A       | G       | 1106.65  | 134  | 1/1 | 1/1 | 1/1 | 1/1 | 1/1 | 0/0 | 0/1 | intergenic, MODIFIER NONE | -1                        | CDCA2-ENSSSCG00000022148            | -1                       |    |
| 14 | 11232079 | C       | T       | 1365.75  | 132  | 1/1 | 1/1 | 1/1 | 1/1 | 1/1 | 0/0 | 0/1 | intergenic, MODIFIER NONE | -1                        | ENSSSCG00000009655-PPP2R2A          | -1                       |    |
| 14 | 11232125 | C       | A       | 1520.67  | 111  | 1/1 | 1/1 | 1/1 | 1/1 | 1/1 | 0/0 | 0/1 | intergenic, MODIFIER NONE | -1                        | ENSSSCG00000009655-PPP2R2A          | -1                       |    |
| 14 | 11232127 | T       | C       | 1506.6   | 112  | 1/1 | 1/1 | 1/1 | 1/1 | 1/1 | 0/0 | 0/1 | intergenic, MODIFIER NONE | -1                        | ENSSSCG00000009655-PPP2R2A          | -1                       |    |
| 14 | 11232129 | A       | G       | 1732.52  | 118  | 1/1 | 1/1 | 1/1 | 1/1 | 1/1 | 0/0 | 0/1 | intergenic, MODIFIER NONE | -1                        | ENSSSCG00000009655-PPP2R2A          | -1                       |    |
| 14 | 50886236 | AC      | A       | 3668.45  | 187  | 1/1 | 1/1 | 1/1 | 1/1 | 1/1 | 0/0 | 0/1 | intron_vari MODIFIER NONE | c.426+1535delG            | MORC2 protein_coding                | ENSSSCTO 6               |    |
| 14 | 58561330 | T       | C       | 5117.15  | 292  | 1/1 | 1/1 | 1/1 | 0/1 | 0/1 | 0/0 | 0/1 | intron_vari MODIFIER NONE | c.1512+503A>G             | MTR protein_coding                  | ENSSSCTO 16              |    |
| 14 | 58859778 | G       | T       | 8164.15  | 388  | 1/1 | 1/1 | 1/1 | 0/1 | 0/1 | 0/0 | 0/1 | intron_vari MODIFIER NONE | c.45+3513C>A              | LGALS8 protein_coding               | ENSSSCTO 1               |    |
| 14 | 59983496 | A       | G       | 5287.15  | 230  | 1/1 | 1/1 | 1/1 | 0/1 | 0/1 | 0/0 | 0/1 | intergenic, MODIFIER NONE | -1                        | TBCE-GGPS1                          | -1                       |    |
| 14 | 61203599 | CT      | C       | 3265.99  | 214  | 1/1 | 1/1 | 1/1 | 1/1 | 1/1 | 0/0 | 1/1 | intergenic, MODIFIER NONE | -1                        | SLC35F3-KCNK1                       | -1                       |    |
| 14 | 1.16E+08 | C       | CA      | 1060.08  | 214  | 1/1 | 1/1 | 1/1 | 1/1 | 1/1 | 0/1 | 0/1 | intron_vari MODIFIER NONE | c.688+3065_688+306        | ENSSSCG protein_coding              | ENSSSCTO 9               |    |
| 14 | 1.16E+08 | G       | C       | 1131.99  | 122  | 1/1 | 1/1 | 1/1 | 1/1 | 1/1 | 0/0 | 1/1 | intron_vari MODIFIER NONE | c.688+1970C>G             | ENSSSCG protein_coding              | ENSSSCTO 9               |    |
| 14 | 1.16E+08 | G       | C       | 1420.9   | 145  | 1/1 | 1/1 | 1/1 | 1/1 | 1/1 | 0/0 | 0/1 | intron_vari MODIFIER NONE | c.688+1912C>G             | ENSSSCG protein_coding              | ENSSSCTO 9               |    |
| 14 | 1.16E+08 | C       | T       | 1958.88  | 154  | 1/1 | 1/1 | 1/1 | 1/1 | 1/1 | 0/0 | 1/1 | intron_vari MODIFIER NONE | c.688+1890G>A             | ENSSSCG protein_coding              | ENSSSCTO 9               |    |
| 14 | 1.19E+08 | A       | C       | 1314.17  | 185  | 1/1 | 1/1 | 1/1 | 1/1 | 1/1 | 0/0 | 1/1 | intergenic, MODIFIER NONE | -1                        | LOXL4-ENSSSCG00000010533            | -1                       |    |
| 14 | 1.31E+08 | G       | A       | 1212.32  | 124  | 1/1 | 1/1 | 1/1 | 1/1 | 1/1 | 0/0 | 1/1 | intergenic, MODIFIER NONE | -1                        | SNORA62-XPNPEP1                     | -1                       |    |
| 14 | 1.42E+08 | A       | C       | 1910.13  | 118  | 1/1 | 1/1 | 1/1 | 1/1 | 0/1 | 1/1 | 0/0 | 0/1                       | intergenic, MODIFIER NONE | -1                                  | ENSSSCG00000010692-FGFR2 | -1 |
| 14 | 1.42E+08 | A       | C       | 1751.03  | 113  | 1/1 | 0/1 | 0/1 | 0/1 | 1/1 | 0/0 | 1/1 | intergenic, MODIFIER NONE | -1                        | ENSSSCG00000010692-FGFR2            | -1                       |    |
| 15 | 19740207 | C       | A       | 1451.84  | 147  | 0/0 | 0/1 | 0/1 | 1/1 | 1/1 | 1/1 | 1/1 | intergenic, MODIFIER NONE | -1                        | ENSSSCG00000029118-ENSSSCG000000015 | -1                       |    |
| 15 | 24436358 | T       | C       | 1285.4   | 173  | 0/0 | 0/1 | 0/1 | 1/1 | 1/1 | 1/1 | 1/1 | intergenic, MODIFIER NONE | -1                        | U6-ENSSSCG00000026504               | -1                       |    |
| 15 | 29972309 | G       | A       | 1001.36  | 145  | 0/0 | 0/1 | 0/1 | 1/1 | 1/1 | 1/1 | 0/1 | intergenic, MODIFIER NONE | -1                        | GYPC-ENSSSCG00000023800             | -1                       |    |
| 15 | 34676931 | C       | T       | 1022.27  | 153  | 0/0 | 0/1 | 0/1 | 1/1 | 1/1 | 1/1 | 0/1 | upstream_ MODIFIER NONE   | c.-76C>T                  | ENSSSCG protein_coding              | ENSSSCTO -1              |    |
| 15 | 34676931 | C       | T       | 1022.27  | 153  | 0/0 | 0/1 | 0/1 | 1/1 | 1/1 | 1/1 | 0/1 | intergenic, MODIFIER NONE | -1                        | TSN-ENSSSCG00000015730              | -1                       |    |
| 15 | 38157850 | T       | TA      | 1519.66  | 225  | 0/0 | 0/1 | 0/1 | 1/1 | 1/1 | 1/1 | 1/1 | intergenic, MODIFIER NONE | n.null_nullinsA           | ENSSSCG00000015747-ENSSSCG000000029 | -1                       |    |

|    |          |     |     |         |     |     |     |     |     |     |     |     |                            |                     |                                     |             |
|----|----------|-----|-----|---------|-----|-----|-----|-----|-----|-----|-----|-----|----------------------------|---------------------|-------------------------------------|-------------|
| 15 | 40325994 | A   | C   | 1181.59 | 141 | 0/0 | 0/1 | 0/1 | 1/1 | 1/1 | 1/1 | 0/1 | intergenic, MODIFIER NONE  | -1                  | ENSSSCG00000015748-U6               | -1          |
| 15 | 65506863 | G   | A   | 1070.23 | 133 | 0/0 | 0/1 | 0/1 | 1/1 | 1/1 | 1/1 | 1/1 | intergenic, MODIFIER NONE  | -1                  | SNORA19-HS65T1                      | -1          |
| 15 | 65506911 | C   | T   | 1551.78 | 156 | 0/0 | 0/1 | 0/1 | 1/1 | 1/1 | 1/1 | 1/1 | intergenic, MODIFIER NONE  | -1                  | SNORA19-HS65T1                      | -1          |
| 15 | 1.09E+08 | A   | C   | 1425.75 | 160 | 0/0 | 0/1 | 0/1 | 1/1 | 1/1 | 1/1 | 1/1 | intergenic, MODIFIER NONE  | -1                  | TMEFF2-STK17B                       | -1          |
| 15 | 1.36E+08 | G   | T   | 1526.59 | 126 | 0/0 | 0/1 | 0/1 | 1/1 | 1/1 | 1/1 | 1/1 | intergenic, MODIFIER NONE  | -1                  | U6-SNORA31                          | -1          |
| 15 | 1.41E+08 | C   | CA  | 1924.64 | 229 | 0/0 | 0/1 | 0/1 | 1/1 | 0/1 | 1/1 | 1/1 | intergenic, MODIFIER NONE  | n.null_nullinsA     | U6-ENSSSCG00000030288               | -1          |
| 15 | 1.48E+08 | A   | C   | 1090.49 | 279 | 1/1 | 0/1 | 1/1 | 1/1 | 1/1 | 0/0 | 0/1 | intergenic, MODIFIER NONE  | -1                  | ENSSSCG00000016302-ENSSSCG000000030 | -1          |
| 15 | 1.52E+08 | T   | G   | 2098.44 | 178 | 1/1 | 1/1 | 1/1 | 0/1 | 0/1 | 0/0 | 0/1 | intergenic, MODIFIER NONE  | -1                  | ENSSSCG00000016328-ENSSSCG000000016 | -1          |
| 15 | 1.52E+08 | TA  | T   | 1704.25 | 190 | 1/1 | 1/1 | 1/1 | 0/1 | 0/1 | 0/0 | 0/0 | upstream, MODIFIER NONE    | c.-1delA            | ENSSSCG protein_coding              | ENSSSCT0 -1 |
| 15 | 1.52E+08 | TA  | T   | 1704.25 | 190 | 1/1 | 1/1 | 1/1 | 0/1 | 0/1 | 0/0 | 0/0 | intergenic, MODIFIER NONE  | -1                  | KLHL30-ENSSSCG00000016337           | -1          |
| 15 | 1.54E+08 | G   | A   | 1353.36 | 153 | 1/1 | 1/1 | 1/1 | 0/1 | 0/1 | 0/0 | 0/1 | intergenic, MODIFIER NONE  | -1                  | ENSSSCG00000023644-ENSSSCG000000029 | -1          |
| 15 | 1.54E+08 | C   | A   | 1180.32 | 134 | 1/1 | 1/1 | 1/1 | 0/1 | 0/1 | 0/0 | 0/1 | intergenic, MODIFIER NONE  | -1                  | ENSSSCG00000023644-ENSSSCG000000029 | -1          |
| 16 | 8032570  | GA  | G   | 2914.9  | 230 | 0/0 | 0/1 | 0/0 | 1/1 | 1/1 | 1/1 | 0/1 | intergenic, MODIFIER NONE  | -1                  | 7SK-CDH18                           | -1          |
| 16 | 20790534 | A   | G   | 1658.17 | 148 | 0/0 | 0/1 | 0/1 | 1/1 | 1/1 | 1/1 | 0/1 | intergenic, MODIFIER NONE  | -1                  | AMACR-CLQTNF3                       | -1          |
| 16 | 3389119  | C   | G   | 2412.15 | 153 | 1/1 | 1/1 | 1/1 | 0/1 | 0/1 | 0/0 | 0/1 | intergenic, MODIFIER NONE  | -1                  | U6-ENSSSCG00000029792               | -1          |
| 16 | 4280860  | C   | T   | 5137.61 | 307 | 1/1 | 1/1 | 1/1 | 0/1 | 0/1 | 0/0 | 0/1 | intergenic, MODIFIER NONE  | -1                  | ENSSSCG00000016781-FAM105A          | -1          |
| 16 | 23627177 | G   | A   | 1113.76 | 128 | 1/1 | 1/1 | 1/1 | 1/1 | 1/1 | 0/0 | 0/0 | intergenic, MODIFIER NONE  | -1                  | C5orf42-NUP155                      | -1          |
| 16 | 51146564 | C   | T   | 1708.51 | 119 | 1/1 | 1/1 | 1/1 | 0/1 | 0/1 | 0/0 | 1/1 | intergenic, MODIFIER NONE  | -1                  | ENSSSCG00000024880-CCN1             | -1          |
| 16 | 51214619 | A   | T   | 1043.51 | 136 | 1/1 | .   | 1/1 | 0/1 | 0/1 | 0/0 | 1/1 | intron_vari MODIFIER NONE  | c.84-4007T>A        | SLC30A5 protein_coding              | ENSSSCT0 -1 |
| 16 | 51214627 | C   | T   | 1148.5  | 134 | 1/1 | 1/1 | 1/1 | 0/1 | 0/1 | 0/0 | 1/1 | intron_vari MODIFIER NONE  | c.84-4015G>A        | SLC30A5 protein_coding              | ENSSSCT0 1  |
| 16 | 51368450 | T   | A   | 1304.22 | 150 | 1/1 | 1/1 | 1/1 | 0/1 | 0/0 | 0/0 | 1/1 | intron_vari MODIFIER NONE  | c.-40-3851T>A       | ENSSSCG protein_coding              | ENSSSCT0 1  |
| 16 | 51534787 | G   | A   | 2600.53 | 161 | 1/1 | 1/1 | 1/1 | 0/1 | 0/1 | 0/0 | 1/1 | intergenic, MODIFIER NONE  | -1                  | ENSSSCG00000027784-ENSSSCG000000021 | -1          |
| 16 | 76268357 | C   | T   | 1498.96 | 152 | 1/1 | 1/1 | 1/1 | 0/1 | 0/1 | 0/0 | 0/1 | intergenic, MODIFIER NONE  | -1                  | SNORA18-U6                          | -1          |
| 17 | 36984058 | C   | CT  | 1772.88 | 238 | 0/0 | 0/0 | 0/0 | 0/1 | 1/1 | 1/1 | 1/1 | intergenic, MODIFIER NONE  | n.null_nullinsT     | OXT-MRPS26                          | -1          |
| 17 | 40342407 | C   | T   | 1218.62 | 126 | 0/0 | 0/1 | 0/1 | 1/1 | 1/1 | 1/1 | 1/1 | upstream, MODIFIER NONE    | c.-1C>T             | ENSSSCG protein_coding              | ENSSSCT0 -1 |
| 17 | 40342407 | C   | T   | 1218.62 | 126 | 0/0 | 0/1 | 0/1 | 1/1 | 1/1 | 1/1 | 1/1 | intron_vari MODIFIER NONE  | c.-172+1139C>T      | DUSP15 protein_coding               | ENSSSCT0 3  |
| 17 | 40342423 | A   | T   | 1394.48 | 134 | 0/0 | 0/1 | 0/1 | 1/1 | 1/1 | 1/1 | 1/1 | upstream, MODIFIER NONE    | c.-1A>T             | ENSSSCG protein_coding              | ENSSSCT0 -1 |
| 17 | 40342423 | A   | T   | 1394.48 | 134 | 0/0 | 0/1 | 0/1 | 1/1 | 1/1 | 1/1 | 1/1 | intron_vari MODIFIER NONE  | c.-172+1155A>T      | DUSP15 protein_coding               | ENSSSCT0 3  |
| 17 | 40342441 | T   | G   | 1631.21 | 147 | 0/0 | 0/1 | 0/1 | 1/1 | 1/1 | 1/1 | 1/1 | upstream, MODIFIER NONE    | c.-1T>G             | ENSSSCG protein_coding              | ENSSSCT0 -1 |
| 17 | 40342441 | T   | G   | 1631.21 | 147 | 0/0 | 0/1 | 0/1 | 1/1 | 1/1 | 1/1 | 1/1 | intron_vari MODIFIER NONE  | c.-172+1173T>G      | DUSP15 protein_coding               | ENSSSCT0 3  |
| 17 | 43895202 | T   | A   | 1201.82 | 145 | 0/0 | 0/1 | 0/1 | 1/1 | 1/1 | 1/1 | 1/1 | intron_vari MODIFIER NONE  | c.24+870A>T         | ENSSSCG protein_coding              | ENSSSCT0 1  |
| 17 | 21668562 | C   | T   | 2394.78 | 162 | 1/1 | 1/1 | 1/1 | 1/1 | 1/1 | 0/0 | 1/1 | upstream, MODIFIER NONE    | c.-90C>T            | ENSSSCG protein_coding              | ENSSSCT0 -1 |
| 17 | 21668562 | C   | T   | 2394.78 | 162 | 1/1 | 1/1 | 1/1 | 1/1 | 1/1 | 0/0 | 1/1 | intergenic, MODIFIER NONE  | -1                  | ANKF1-ENSSSCG00000026985            | -1          |
| 17 | 23826537 | T   | A   | 1078.73 | 133 | 1/1 | 1/1 | 1/1 | 1/1 | 1/1 | 0/0 | 1/1 | intergenic, MODIFIER NONE  | -1                  | ENSSSCG0000007069-SPTLC3            | -1          |
| 17 | 23835070 | T   | G   | 1434.17 | 154 | 1/1 | 1/1 | 1/1 | 1/1 | 1/1 | 0/0 | 1/1 | intergenic, MODIFIER NONE  | -1                  | ENSSSCG0000007069-SPTLC3            | -1          |
| 17 | 31389795 | C   | G   | 1023.35 | 142 | 1/1 | 1/1 | 1/1 | 1/1 | 1/1 | 0/0 | 1/1 | intergenic, MODIFIER NONE  | -1                  | ENSSSCG00000028421-U6               | -1          |
| 17 | 64082231 | C   | CCA | 1407.88 | 248 | 1/1 | 0/1 | 0/1 | 0/1 | 0/1 | 0/0 | 0/1 | upstream, MODIFIER NONE    | c.-8_-8insTG        | AURKA protein_coding                | ENSSSCT0 -1 |
| 17 | 64082231 | C   | CCA | 1407.88 | 248 | 1/1 | 0/1 | 0/1 | 0/1 | 0/1 | 0/0 | 0/1 | upstream, MODIFIER NONE    | c.-165_-165insCA    | CSTF1 protein_coding                | ENSSSCT0 -1 |
| 17 | 64082231 | C   | CCA | 1407.88 | 248 | 1/1 | 0/1 | 0/1 | 0/1 | 0/1 | 0/0 | 0/1 | intra-genic, MODIFIER NONE | n.null_nullinsTG    | AURKA                               | -1          |
| 17 | 68238296 | T   | C   | 2282.55 | 159 | 1/1 | 1/1 | 1/1 | 1/1 | 1/1 | 0/0 | 0/1 | intergenic, MODIFIER NONE  | -1                  | ENSSSCG00000026743-ENSSSCG000000007 | -1          |
| 18 | 40749240 | G   | GA  | 1047.25 | 198 | 0/0 | 0/1 | 0/1 | 1/1 | 1/1 | 1/1 | 0/1 | intron_vari MODIFIER NONE  | c.-141+11760_-141+. | ELMO1 protein_coding                | ENSSSCT0 14 |
| 18 | 46377954 | A   | G   | 1019.53 | 97  | 0/0 | 0/1 | 0/1 | 1/1 | 1/1 | 1/1 | 1/1 | intergenic, MODIFIER NONE  | -1                  | PAC1-GHRHR                          | -1          |
| 18 | 55245294 | T   | C   | 1405.56 | 122 | 0/0 | 0/1 | 1/1 | 0/0 | 0/1 | 1/1 | 1/1 | intron_vari MODIFIER NONE  | c.273+8194A>G       | CCM2 protein_coding                 | ENSSSCT0 3  |
| 18 | 52031687 | T   | C   | 3553.03 | 145 | 1/1 | 1/1 | 1/1 | 0/1 | 1/1 | 0/0 | 1/1 | upstream, MODIFIER NONE    | c.-74T>C            | CYCS protein_coding                 | ENSSSCT0 -1 |
| 18 | 52031687 | T   | C   | 3553.03 | 145 | 1/1 | 1/1 | 1/1 | 0/1 | 1/1 | 0/0 | 1/1 | intergenic, MODIFIER NONE  | -1                  | ssc-mir-148a-CYCS                   | -1          |
| 18 | 53769580 | TG  | T   | 1178.98 | 202 | 1/1 | 1/1 | 1/1 | 0/1 | 1/1 | 0/0 | 0/1 | intron_vari MODIFIER NONE  | c.201+530delG       | TNS3 protein_coding                 | ENSSSCT0 7  |
| 18 | 56318142 | A   | AC  | 1116.05 | 247 | 1/1 | 1/1 | 1/1 | 1/1 | 1/1 | 0/0 | 0/1 | intergenic, MODIFIER NONE  | n.null_nullinsC     | 5S_rRNA-HECW1                       | -1          |
| 18 | 58731545 | T   | C   | 1047.26 | 138 | 1/1 | 1/1 | 1/1 | 1/1 | 1/1 | 0/0 | 0/1 | intergenic, MODIFIER NONE  | -1                  | ENSSSCG00000016765-ENSSSCG000000016 | -1          |
| X  | 6727207  | TGC | T   | 3333.81 | 261 | 0/0 | 0/0 | 0/0 | 0/1 | 0/1 | 1/1 | 1/1 | intron_vari MODIFIER NONE  | c.317+3568_317+356  | SHROOM2; protein_coding             | ENSSSCT0 2  |
| X  | 7195511  | T   | G   | 2281.44 | 201 | 0/0 | 0/0 | 0/0 | 0/1 | 0/1 | 1/1 | 1/1 | intron_vari MODIFIER NONE  | n.634+28971T>G      | WWC3 processed_transcript           | ENSSSCT0 1  |
| X  | 16072712 | G   | A   | 2807.39 | 231 | 0/0 | 0/0 | 0/0 | 0/1 | 0/1 | 1/1 | 1/1 | intron_vari MODIFIER NONE  | c.-166+29841G>A     | CDKL5 protein_coding                | ENSSSCT0 1  |
| X  | 16832884 | G   | T   | 2050.16 | 215 | 0/0 | 0/0 | 0/0 | 0/1 | 0/1 | 0/0 | 1/1 | intergenic, MODIFIER NONE  | -1                  | GPR64-CH242-78D20.1                 | -1          |
| X  | 41124308 | T   | C   | 1782.89 | 342 | 0/0 | 0/0 | 0/0 | 0/1 | 0/1 | 1/1 | 0/1 | intergenic, MODIFIER NONE  | -1                  | ENSSSCG00000028209-BDX3X            | -1          |
| X  | 42697359 | C   | G   | 2041.24 | 207 | 0/0 | 0/0 | 0/0 | 0/1 | 0/1 | 1/1 | 0/1 | intergenic, MODIFIER NONE  | -1                  | CH242-132C3.1-MAOA                  | -1          |
| X  | 43258366 | G   | A   | 2440.15 | 278 | 0/0 | 0/0 | 0/0 | 0/1 | 0/1 | 1/1 | 0/1 | intergenic, MODIFIER NONE  | -1                  | MAOA-MAOB                           | -1          |
| X  | 1.26E+08 | A   | G   | 3689.76 | 221 | 0/0 | 0/1 | 0/0 | 0/1 | 0/1 | 1/1 | 1/1 | intron_vari MODIFIER NONE  | c.1163+5756T>C      | GPC3 protein_coding                 | ENSSSCT0 4  |
| X  | 1.29E+08 | T   | A   | 2958.38 | 334 | 0/0 | 0/0 | 0/0 | 0/1 | 0/1 | 1/1 | 1/1 | intergenic, MODIFIER NONE  | -1                  | ZIC3-CH242-204G11.1                 | -1          |
| X  | 1.29E+08 | T   | C   | 1319.7  | 177 | 0/0 | 0/0 | 0/0 | 0/1 | 0/1 | 1/1 | 1/1 | intergenic, MODIFIER NONE  | -1                  | ZIC3-CH242-204G11.1                 | -1          |
| X  | 1.31E+08 | C   | T   | 2758.79 | 236 | 0/0 | 0/1 | 0/1 | 0/1 | 0/1 | 1/1 | 1/1 | intron_vari MODIFIER NONE  | c.435+4062G>A       | ATP11C protein_coding               | ENSSSCT0 5  |
| X  | 13939179 | A   | G   | 4981.55 | 203 | 1/1 | 1/1 | 1/1 | 1/1 | 1/1 | 0/0 | 1/1 | intergenic, MODIFIER NONE  | -1                  | CH242-19L11.2-CTPS2                 | -1          |
| X  | 39984625 | G   | A   | 2897.52 | 302 | 1/1 | 1/1 | 1/1 | 0/1 | 0/1 | 0/0 | 0/0 | intergenic, MODIFIER NONE  | -1                  | BCOR-U6                             | -1          |
| X  | 41079471 | G   | A   | 3869.42 | 214 | 1/1 | 0/1 | 0/1 | 0/1 | 0/1 | 0/0 | 0/1 | intergenic, MODIFIER NONE  | -1                  | CH242-15C8.2-ENSSSCG00000028209     | -1          |
| X  | 41102232 | G   | T   | 3260.2  | 177 | 1/1 | 1/1 | 1/1 | 0/1 | 0/1 | 0/0 | 0/1 | upstream, MODIFIER NONE    | n.-1C>A             | ENSSSCG miRNA                       | ENSSSCT0 -1 |
| X  | 41102232 | G   | T   | 3260.2  | 177 | 1/1 | 1/1 | 1/1 | 0/1 | 0/1 | 0/0 | 0/1 | intergenic, MODIFIER NONE  | -1                  | ENSSSCG00000028209-BDX3X            | -1          |
| X  | 41508271 | C   | A   | 3953.15 | 226 | 1/1 | 1/1 | 1/1 | 1/1 | 0/1 | 0/0 | 0/1 | intron_vari MODIFIER NONE  | c.832-2414G>T       | CASK protein_coding                 | ENSSSCT0 8  |
| X  | 41799395 | G   | A   | 1054.68 | 200 | 1/1 | 1/1 | 1/1 | 0/1 | 0/1 | 0/0 | 1/1 | intergenic, MODIFIER NONE  | -1                  | CASK-U6                             | -1          |
| X  | 44200178 | T   | A   | 2969.2  | 206 | 1/1 | 1/1 | 1/1 | 0/1 | 0/1 | 0/0 | 0/1 | intergenic, MODIFIER NONE  | -1                  | FUNDC1-5S_rRNA                      | -1          |

|   |          |   |   |         |     |     |     |     |     |     |     |     |                           |    |                                     |            |
|---|----------|---|---|---------|-----|-----|-----|-----|-----|-----|-----|-----|---------------------------|----|-------------------------------------|------------|
| X | 44229447 | T | C | 3585.55 | 137 | 1/1 | 0/1 | 1/1 | 1/1 | 0/1 | 0/0 | 1/1 | intergenic, MODIFIER NONE | -1 | FUNDC1-5S_rRNA                      | -1         |
| X | 44407361 | T | C | 1746.24 | 207 | 1/1 | 1/1 | 1/1 | 0/1 | 0/1 | 0/0 | 0/1 | intergenic, MODIFIER NONE | -1 | CH242-517A18.1-DUSP21               | -1         |
| X | 44769158 | C | T | 2943.35 | 169 | 1/1 | 1/1 | 1/1 | 0/1 | 0/1 | 0/0 | 0/1 | intron_vari MODIFIER NONE | -1 | CXorf36 protein_coding              | ENSSSCT0 1 |
| X | 45055606 | G | A | 3180.5  | 228 | 1/1 | 1/1 | 1/1 | 0/1 | 0/1 | 0/0 | 0/1 | intergenic, MODIFIER NONE | -1 | CH242-210O3.1-ssc-mir-221           | -1         |
| X | 1.05E+08 | G | A | 2693.18 | 189 | 1/1 | 1/1 | 1/1 | 0/1 | 0/1 | 0/0 | 0/1 | intergenic, MODIFIER NONE | -1 | NXT2-KCNE1L                         | -1         |
| X | 1.13E+08 | G | A | 3693.34 | 606 | 1/1 | 1/1 | 1/1 | 0/1 | 0/1 | 0/0 | 0/1 | intergenic, MODIFIER NONE | -1 | ENSSSCG00000022359-UPF3B            | -1         |
| X | 1.15E+08 | C | G | 2156.2  | 144 | 1/1 | 1/1 | 1/1 | 0/1 | 0/1 | 0/0 | 0/1 | intergenic, MODIFIER NONE | -1 | ENSSSCG00000012636-ENSSSCG000000012 | -1         |
| X | 1.15E+08 | C | A | 2927.37 | 181 | 1/1 | 1/1 | 1/1 | 1/1 | 1/1 | 0/0 | 1/1 | intergenic, MODIFIER NONE | -1 | ENSSSCG00000012637-GRIA3            | -1         |
| X | 1.15E+08 | C | G | 2976.45 | 180 | 1/1 | 1/1 | 1/1 | 1/1 | 1/1 | 0/0 | 1/1 | intergenic, MODIFIER NONE | -1 | ENSSSCG00000012637-GRIA3            | -1         |

c.174-2066C>T
