# Supplementary material for: No excessive mutations in transcription activator-like effector nuclease-mediated α-1,3-galactosyltransferase knockout Yucatan miniature pigs
Source: PubMed Central journal article supplement (PMC6946973; doi:10.5713/ajas.19.0480), 2019-08-23
Supplement: ajas-19-0480-suppl6.pdf [file ajas-19-0480-suppl6.pdf]

Supplementary Table 6. Variant calls of wild type strain control WT3

| #CHROM | POS      | ID | REF     | ALT   | QUAL    | FILTER | DP   | Donor | CJ1 | CB1 | CB3 | WT1 | WT2 | WT3 | EFF[*].EFF<br>ECT | EFF[*].JM<br>PACT | EFF[*].FU<br>NCLASS | EFF[*].CO<br>DON | EFF[*].AA<br>EFF[*].AA<br>_LEN       | EFF[*].GE<br>NE | EFF[*].BIO<br>TYPE | EFF[*].CO<br>DING | EFF[*].TRI<br>D | EFF[*].RA<br>NK              | Head | Note |
|--------|----------|----|---------|-------|---------|--------|------|-------|-----|-----|-----|-----|-----|-----|-------------------|-------------------|---------------------|------------------|--------------------------------------|-----------------|--------------------|-------------------|-----------------|------------------------------|------|------|
| 1      | 9896270  |    | G       | C     | 1115.83 |        | 1144 | 0/0   | 0/1 | 0/1 | 0/1 | 0/1 | 0/1 | 1/1 | intron_vari       | MODIFIER NONE     | c.377-3078C>G       | -1               | FNDC1                                | protein_coding  | ENSSSCT0           | 3                 | #CHROM          | Chromosome                   |      |      |
| 1      | 1.09E+08 |    | C       | CA    | 1282.4  |        | 229  | 0/0   | 0/0 | 0/0 | 1/1 | 0/1 | 1/1 | 1/1 | upstream_         | MODIFIER NONE     | n.-1_-1insA         | -1               | SCARNA1                              | snoRNA          | ENSSSCT0           | -1                | POS             | Position                     |      |      |
| 1      | 1.09E+08 |    | C       | CA    | 1282.4  |        | 229  | 0/0   | 0/0 | 0/0 | 1/1 | 0/1 | 1/1 | 1/1 | upstream_         | MODIFIER NONE     | n.-1_-1insA         | -1               | SCARNA1                              | snoRNA          | ENSSSCT0           | -1                | ID              | Identification               |      |      |
| 1      | 1.09E+08 |    | C       | CA    | 1282.4  |        | 229  | 0/0   | 0/0 | 0/0 | 1/1 | 0/1 | 1/1 | 1/1 | intron_vari       | MODIFIER NONE     | c.16+1468_16+1469i  | -1               | ACAA2                                | protein_coding  | ENSSSCT0           | 1                 | REF             | Reference seq (Sscrofa 10.2) |      |      |
| 1      | 1.82E+08 |    | T       | C     | 4023.92 |        | 210  | 0/0   | 0/0 | 0/1 | 1/1 | 1/1 | 1/1 | 1/1 | intergenic        | MODIFIER NONE     |                     | -1               | U2-DIS3L                             |                 |                    | -1                | ALT             | Alternative sequence         |      |      |
| 1      | 1.9E+08  |    | A       | G     | 1167.65 |        | 122  | 0/0   | 1/1 | 0/1 | 1/1 | 1/1 | 1/1 | 1/1 | intergenic        | MODIFIER NONE     |                     | -1               | 5S_rRNA-U6                           |                 |                    | -1                | QUAL            | Quality                      |      |      |
| 1      | 25316240 |    | A       | G     | 1531.7  |        | 149  | 1/1   | 1/1 | 1/1 | 0/1 | 0/1 | 0/1 | 0/0 | intron_vari       | MODIFIER NONE     | c.82+17399A>G       | -1               | GPR126                               | protein_coding  | ENSSSCT0           | 2                 | FILTER          |                              |      |      |
| 1      | 25316252 |    | A       | G     | 1288.24 |        | 139  | 1/1   | 1/1 | 1/1 | 0/1 | 0/1 | 0/1 | 0/0 | intron_vari       | MODIFIER NONE     | c.82+17411A>G       | -1               | GPR126                               | protein_coding  | ENSSSCT0           | 2                 | DP              | Total depth                  |      |      |
| 1      | 26094212 |    | GT      | G     | 2761.52 |        | 245  | 1/1   | 1/1 | 1/1 | 1/1 | 1/1 | 0/1 | 0/0 | intergenic        | MODIFIER NONE     |                     | -1               | NMBR-ENSSSCG00000019021              |                 |                    | -1                | EFF[*].EFFE     | Genetic element              |      |      |
| 1      | 34180135 |    | T       | C     | 4928.15 |        | 313  | 1/1   | 1/1 | 1/1 | 0/1 | 0/1 | 0/1 | 0/0 | intergenic        | MODIFIER NONE     |                     | -1               | ENSSSCG00000023999-RPS12             |                 |                    | -1                | EFF[*].JMP      | Functional annotation        |      |      |
| 1      | 34959460 |    | G       | GT    | 2439.16 |        | 265  | 1/1   | 0/1 | 1/1 | 1/1 | 1/1 | 0/1 | 0/0 | intergenic        | MODIFIER NONE     | n.null_nullinsT     | -1               | MOXD1-CTGF                           |                 |                    | -1                | EFF[*].FUNCLASS |                              |      |      |
| 1      | 36919425 |    | CA      | C     | 4336.64 |        | 222  | 1/1   | 1/1 | 1/1 | 0/0 | 0/1 | 0/1 | 0/0 | intergenic        | MODIFIER NONE     |                     | -1               | L3MBTL3-TMEM244                      |                 |                    | -1                | EFF[*].CODON    |                              |      |      |
| 1      | 38168772 |    | A       | AAAT  | 6612.76 |        | 239  | 1/1   | 1/1 | 1/1 | 0/1 | 0/1 | 0/1 | 0/0 | intergenic        | MODIFIER NONE     | n.null_nullinsAAT   | -1               | ENSSSCG00000029684-PTPRK             |                 |                    | -1                | EFF[*].AA       |                              |      |      |
| 1      | 39516877 |    | C       | CA    | 3080.19 |        | 243  | 1/1   | 1/1 | 1/1 | 0/0 | 0/0 | 1/1 | 0/0 | intergenic        | MODIFIER NONE     | n.null_nullinsA     | -1               | KIAA0408-ENSSSCG00000004216          |                 |                    | -1                | EFF[*].AA_LEN   |                              |      |      |
| 1      | 56505569 |    | AT      | A     | 2632.13 |        | 212  | 1/1   | 1/1 | 1/1 | 0/0 | 0/1 | 0/1 | 0/0 | intron_vari       | MODIFIER NONE     | c.2398-1185delT     | -1               | COL19A1                              | protein_coding  | ENSSSCT0           | 36                | EFF[*].GENE     |                              |      |      |
| 1      | 65224934 |    | G       | GTCTC | 1308.19 |        | 138  | 1/1   | 0/1 | 0/1 | 0/1 | 0/1 | 1/1 | 0/0 | intergenic        | MODIFIER NONE     | n.null_nullinsTCTC  | -1               | BACH2-MAP3K7                         |                 |                    | -1                | EFF[*].BIOTYPE  |                              |      |      |
| 1      | 78454772 |    | A       | G     | 1452.57 |        | 135  | 1/1   | 1/1 | 1/1 | 0/1 | 0/1 | 1/1 | 0/0 | intergenic        | MODIFIER NONE     |                     | -1               | GRIK2-HACE1                          |                 |                    | -1                | EFF[*].CODING   |                              |      |      |
| 1      | 78454780 |    | G       | C     | 1445.63 |        | 133  | 1/1   | 1/1 | 1/1 | 0/1 | 0/1 | 1/1 | 0/0 | intergenic        | MODIFIER NONE     |                     | -1               | GRIK2-HACE1                          |                 |                    | -1                | EFF[*].TRID     |                              |      |      |
| 1      | 78454817 |    | T       | C     | 1544.52 |        | 141  | 1/1   | 1/1 | 1/1 | 0/1 | 0/1 | 1/1 | 0/0 | intergenic        | MODIFIER NONE     |                     | -1               | GRIK2-HACE1                          |                 |                    | -1                | EFF[*].RANK     |                              |      |      |
| 1      | 79645931 |    | TTA     | T     | 1517.32 |        | 250  | 1/1   | 1/1 | 1/1 | 0/1 | 0/1 | 1/1 | 0/0 | intergenic        | MODIFIER NONE     | n.null_nulldelTA    | -1               | GRIK2-HACE1                          |                 |                    | -1                | /.              | Not called                   |      |      |
| 1      | 86850348 |    | G       | T     | 1046.14 |        | 126  | 1/1   | 1/1 | 1/1 | 1/1 | 0/1 | 1/1 | 0/0 | intron_vari       | MODIFIER NONE     | c.177+4648C>A       | -1               | ENSSSCG protein_coding               |                 | ENSSSCT0           | 2                 | 0/0             | Homogeneous to REF           |      |      |
| 1      | 92032342 |    | C       | CA    | 1615.99 |        | 213  | 1/1   | 1/1 | 1/1 | 0/1 | 0/1 | 0/1 | 0/0 | intergenic        | MODIFIER NONE     | n.null_nullinsA     | -1               | TSPYL1-DSE                           |                 |                    | -1                | 0/1             | Heterogeneous to REF         |      |      |
| 1      | 1.04E+08 |    | GT      | G     | 1055.61 |        | 249  | 1/1   | 0/1 | 1/1 | 0/1 | 0/1 | 1/1 | 0/0 | intergenic        | MODIFIER NONE     |                     | -1               | MB21D1-ENSSSCG00000025743            |                 |                    | -1                | 1/1             | Homogeneous to ALT           |      |      |
| 1      | 1.04E+08 |    | G       | T     | 1112.95 |        | 116  | 1/1   | 1/1 | 1/1 | 0/1 | 0/1 | 1/1 | 0/0 | intergenic        | MODIFIER NONE     |                     | -1               | ENSSSCG00000025743-SETBP1            |                 |                    | -1                |                 |                              |      |      |
| 1      | 1.23E+08 |    | A       | AT    | 1777.79 |        | 236  | 1/1   | 1/1 | 1/1 | 0/1 | 0/1 | 0/1 | 0/0 | intergenic        | MODIFIER NONE     | n.null_nullinsT     | -1               | ANXA2-ENSSSCG00000004580             |                 |                    | -1                |                 |                              |      |      |
| 1      | 1.29E+08 |    | ATTT    | A     | 3815.41 |        | 228  | 1/1   | 1/1 | 1/1 | 0/1 | 0/1 | 1/1 | 0/0 | intergenic        | MODIFIER NONE     | n.null_nulldelITTT  | -1               | ENSSSCG00000029459-NEDD4             |                 |                    | -1                |                 |                              |      |      |
| 1      | 1.37E+08 |    | A       | ACG   | 5570.43 |        | 214  | 1/1   | 1/1 | 1/1 | 0/1 | 0/0 | 1/1 | 0/0 | intergenic        | MODIFIER NONE     | n.null_nullinsCG    | -1               | ENSSSCG00000004658-DUT               |                 |                    | -1                |                 |                              |      |      |
| 1      | 1.41E+08 |    | AAAC    | A     | 5705.44 |        | 202  | 1/1   | 1/1 | 1/1 | 0/1 | 0/1 | 1/1 | 0/0 | intron_vari       | MODIFIER NONE     | c.1045-155_1045-153 | -1               | DUOX2                                | protein_coding  | ENSSSCT0           | 8                 |                 |                              |      |      |
| 1      | 3.09E+08 |    | T       | C     | 1172.76 |        | 171  | 1/1   | 1/1 | 1/1 | 0/1 | 0/1 | 1/1 | 0/0 | intergenic        | MODIFIER NONE     |                     | -1               | ENSSSCG00000005763-ENSSSCG0000000025 |                 |                    | -1                |                 |                              |      |      |
| 2      | 14567383 |    | A       | G     | 1578.91 |        | 135  | 0/0   | 0/0 | 0/0 | 1/1 | 1/1 | /.  | 1/1 | intergenic        | MODIFIER NONE     |                     | -1               | ENSSSCG000000024728-ENSSSCG000000014 |                 |                    | -1                |                 |                              |      |      |
| 2      | 18863926 |    | T       | TA    | 1322.01 |        | 224  | 0/0   | 0/1 | 0/0 | 0/1 | 0/1 | 0/1 | 1/1 | intergenic        | MODIFIER NONE     | n.null_nullinsA     | -1               | PRDM11-TP53I11                       |                 |                    | -1                |                 |                              |      |      |
| 2      | 19565912 |    | C       | CG    | 1377.89 |        | 149  | 1/1   | 1/1 | 1/1 | 0/1 | 0/1 | 0/1 | 0/0 | intergenic        | MODIFIER NONE     | n.null_nullinsG     | -1               | U5-EXT2                              |                 |                    | -1                |                 |                              |      |      |
| 2      | 27349923 |    | C       | T     | 2201.19 |        | 198  | 1/1   | 1/1 | 1/1 | 0/1 | 0/1 | 0/1 | 0/0 | intron_vari       | MODIFIER NONE     | c.320-2211G>A       | -1               | LDLRAD3                              | protein_coding  | ENSSSCT0           | 3                 |                 |                              |      |      |
| 2      | 28815481 |    | T       | C     | 3404.02 |        | 229  | 1/1   | 1/1 | 1/1 | 0/1 | 0/1 | 1/1 | 0/0 | intergenic        | MODIFIER NONE     |                     | -1               | EHF-ELF5                             |                 |                    | -1                |                 |                              |      |      |
| 2      | 43282851 |    | GT      | G     | 3288.51 |        | 185  | 1/1   | 1/1 | 1/1 | 0/1 | 0/1 | 0/1 | 0/0 | upstream_         | MODIFIER NONE     | c.-104delA          | -1               | CSR3P3                               | protein_coding  | ENSSSCT0           | -1                |                 |                              |      |      |
| 2      | 43282851 |    | GT      | G     | 3288.51 |        | 185  | 1/1   | 1/1 | 1/1 | 0/1 | 0/1 | 0/1 | 0/0 | intergenic        | MODIFIER NONE     |                     | -1               | CSR3P3-ENSSSCG000000021688           |                 |                    | -1                |                 |                              |      |      |
| 3      | 25213842 |    | G       | A     | 1519.45 |        | 174  | 0/0   | 0/1 | 0/1 | 1/1 | 1/1 | 0/1 | 1/1 | intergenic        | MODIFIER NONE     |                     | -1               | ENSSSCG00000007847-ENSSSCG000000007  |                 |                    | -1                |                 |                              |      |      |
| 3      | 27990223 |    | G       | A     | 1259.01 |        | 155  | 0/0   | 0/1 | 0/1 | 1/1 | 1/1 | 0/1 | 1/1 | intergenic        | MODIFIER NONE     |                     | -1               | ENSSSCG00000007872-5S_rRNA           |                 |                    | -1                |                 |                              |      |      |
| 3      | 28057532 |    | A       | T     | 2031    |        | 217  | 0/0   | 0/1 | 0/1 | 0/1 | 0/1 | 0/1 | 1/1 | intergenic        | MODIFIER NONE     |                     | -1               | ENSSSCG00000007872-5S_rRNA           |                 |                    | -1                |                 |                              |      |      |
| 3      | 29467453 |    | G       | A     | 1111.54 |        | 208  | 0/0   | 0/1 | 0/1 | 1/1 | 1/1 | 0/1 | 1/1 | intron_vari       | MODIFIER NONE     | c.289+10436G>A      | -1               | CPPED1                               | protein_coding  | ENSSSCT0           | 2                 |                 |                              |      |      |
| 3      | 32430658 |    | C       | A     | 1259.52 |        | 132  | 0/0   | 0/1 | 0/1 | 1/1 | 1/1 | 0/1 | 1/1 | intergenic        | MODIFIER NONE     |                     | -1               | LITAF-ENSSSCG000000028743            |                 |                    | -1                |                 |                              |      |      |
| 3      | 33134141 |    | C       | T     | 1105.93 |        | 145  | 0/0   | 1/1 | 0/1 | 1/1 | 1/1 | 0/1 | 1/1 | intron_vari       | MODIFIER NONE     | c.376+331C>T        | -1               | ENSSSCG protein_coding               |                 | ENSSSCT0           | 5                 |                 |                              |      |      |
| 3      | 1.39E+08 |    | C       | T     | 1163.73 |        | 148  | 0/0   | 0/1 | 0/1 | 1/1 | 1/1 | 0/1 | 1/1 | intergenic        | MODIFIER NONE     |                     | -1               | ENSSSCG00000025247-ASGR1             |                 |                    | -1                |                 |                              |      |      |
| 3      | 12643285 |    | A       | T     | 1239.73 |        | 141  | 1/1   | 1/1 | 1/1 | 1/1 | 1/1 | 0/0 | 0/0 | intergenic        | MODIFIER NONE     |                     | -1               | ENSSSCG00000024045-ZNF226            |                 |                    | -1                |                 |                              |      |      |
| 3      | 1.09E+08 |    | G       | A     | 1334.41 |        | 150  | 1/1   | 1/1 | 1/1 | 0/1 | 0/1 | 1/1 | 0/0 | intron_vari       | MODIFIER NONE     | c.540+264C>T        | -1               | ENSSSCG protein_coding               |                 | ENSSSCT0           | 5                 |                 |                              |      |      |
| 3      | 1.11E+08 |    | T       | C     | 1103.15 |        | 151  | 1/1   | 1/1 | 1/1 | 0/1 | 0/1 | 1/1 | 0/0 | intergenic        | MODIFIER NONE     |                     | -1               | CRIM1-ENSSSCG00000008506             |                 |                    | -1                |                 |                              |      |      |
| 3      | 1.11E+08 |    | A       | G     | 1204.03 |        | 151  | 1/1   | 1/1 | 1/1 | 0/1 | 0/1 | 1/1 | 0/0 | intergenic        | MODIFIER NONE     |                     | -1               | CRIM1-ENSSSCG00000008506             |                 |                    | -1                |                 |                              |      |      |
| 3      | 1.19E+08 |    | TA      | T     | 1318.87 |        | 160  | 1/1   | 1/1 | 1/1 | 0/1 | 0/1 | 1/1 | 0/0 | intron_vari       | MODIFIER NONE     | c.139-1475delT      | -1               | ABHD1                                | protein_coding  | ENSSSCT0           | 1                 |                 |                              |      |      |
| 3      | 1.19E+08 |    | CT      | C     | 5165.86 |        | 230  | 1/1   | 1/1 | 1/1 | 0/1 | 0/1 | 1/1 | 0/0 | intron_vari       | MODIFIER NONE     | c.624+60delA        | -1               | MAPRE3                               | protein_coding  | ENSSSCT0           | 5                 |                 |                              |      |      |
| 3      | 1.42E+08 |    | A       | T     | 3230.05 |        | 2018 | 1/1   | 0/1 | 1/1 | 1/1 | 0/1 | 1/1 | 0/0 | intergenic        | MODIFIER NONE     |                     | -1               | ACP1-ENSSSCG00000008661              |                 |                    | -1                |                 |                              |      |      |
| 3      | 1.43E+08 |    | T       | G     | 1914.87 |        | 568  | 1/1   | 0/1 | 0/1 | 1/1 | 1/1 | 1/1 | 0/0 | intergenic        | MODIFIER NONE     |                     | -1               | ACP1-ENSSSCG00000008661              |                 |                    | -1                |                 |                              |      |      |
| 4      | 4068921  |    | T       | TG    | 1661.78 |        | 218  | 0/0   | 0/1 | 0/1 | 0/1 | 1/1 | 1/1 | 1/1 | intergenic        | MODIFIER NONE     | n.null_nullinsG     | -1               | ENSSSCG00000005938-5S_rRNA           |                 |                    | -1                |                 |                              |      |      |
| 4      | 9068490  |    | T       | C     | 1288.22 |        | 135  | 0/0   | 0/1 | 0/1 | 1/1 | 1/1 | 0/1 | 1/1 | intron_vari       | MODIFIER NONE     | c.169+46T>C         | -1               | OC90                                 | protein_coding  | ENSSSCT0           | 2                 |                 |                              |      |      |
| 4      | 9068533  |    | C       | G     | 1109.13 |        | 130  | 0/0   | 0/1 | 0/1 | 1/1 | 1/1 | 0/1 | 1/1 | intron_vari       | MODIFIER NONE     | c.169+89C>G         | -1               | OC90                                 | protein_coding  | ENSSSCT0           | 2                 |                 |                              |      |      |
| 4      | 9084210  |    | T       | C     | 1281.3  |        | 160  | 0/0   | 0/1 | 0/1 | 1/1 | 1/1 | 0/1 | 1/1 | intron_vari       | MODIFIER NONE     | c.1070+848T>C       | -1               | OC90                                 | protein_coding  | ENSSSCT0           | 12                |                 |                              |      |      |
| 4      | 9086006  |    | T       | C     | 1388.05 |        | 212  | 0/0   | 0/1 | 0/1 | 1/1 | 1/1 | 0/1 | 1/1 | intron_vari       | MODIFIER NONE     | c.1071-180T>C       | -1               | OC90                                 | protein_coding  | ENSSSCT0           | 12                |                 |                              |      |      |
| 4      | 20598904 |    | C       | CT    | 1482.44 |        | 258  | 0/0   | 0/1 | 0/0 | 0/1 | 0/1 | 1/1 | 1/1 | intergenic        | MODIFIER NONE     | n.null_nullinsT     | -1               | NOV-MAL2                             |                 |                    | -1                |                 |                              |      |      |
| 4      | 43291944 |    | CAAAAAA | C     | 3569.67 |        | 156  | 0/0   | 0/1 | 0/1 | 0/1 | 0/1 | 1/1 | 1/1 | intergenic        | MODIFIER NONE     | n.null_nulldelAAAAA | -1               | SDC2-PTDSS1                          |                 |                    | -1                |                 |                              |      |      |
| 4      | 67994103 |    | TTG     | T     | 1837.94 |        | 214  | 0/0   | 0/0 | 0/1 | 1/1 | 1/1 | 0/1 | 1/1 | intron_vari       | MODIFIER NONE     | c.814+7317_814+731  | -1               | STAU2                                | protein_coding  | ENSSSCT0           | 6                 |                 |                              |      |      |
| 4      | 74051994 |    | T       | C     | 1357.71 |        | 165  | 0/0   | 0/1 | 0/1 | 1/1 | 1/1 | 1/1 | 1/1 | intergenic        | MODIFIER NONE     |                     | -1               | ENSSSCG00000006206-ENSSSCG000000023  |                 |                    | -1                |                 |                              |      |      |
| 4      | 74052001 |    | T       | C     | 1158.98 |        | 164  | 0/0   | 0/1 | 0/1 | 1/1 | 1/1 | 1/1 | 1/1 | intergenic        | MODIFIER NONE     |                     | -1               | ENSSSCG00000006206-ENSSSCG000000023  |                 |                    | -1                |                 |                              |      |      |
| 4      | 84082675 |    | GA      | G     | 3538.89 |        | 265  | 0/0   | 0/0 | 0/1 | 1/1 | 1/1 | 1/1 | 1/1 | intergenic        | MODIFIER NONE     |                     | -1               | SOX17-MRPL15                         |                 |                    | -1                |                 |                              |      |      |

|   |          |      |     |         |      |     |     |     |     |     |     |     |             |               |                          |    |                                     |                                     |             |
|---|----------|------|-----|---------|------|-----|-----|-----|-----|-----|-----|-----|-------------|---------------|--------------------------|----|-------------------------------------|-------------------------------------|-------------|
| 4 | 92282644 | T    | C   | 1536.93 | 143  | 0/0 | 0/1 | 0/1 | 0/1 | 0/1 | 0/1 | 1/1 | intron_vari | MODIFIER NONE | c.263+504T>C             | -1 | FAM78B                              | protein_coding                      | ENSSSCT0 1  |
| 4 | 1.03E+08 | T    | C   | 1067.01 | 145  | 0/0 | 0/1 | 0/1 | 0/1 | 0/1 | 0/1 | 1/1 | missense_1  | MODERAT NONE  | c.1385A>C p.His462A 1359 | -1 | ENSSSCG protein_coding              | ENSSSCT0 2                          |             |
| 4 | 1.04E+08 | C    | G   | 1037.16 | 144  | 0/0 | 0/1 | 0/1 | 0/1 | 0/1 | 0/1 | 1/1 | upstream_   | MODIFIER NONE | c.-137G>C                | -1 | ENSSSCG protein_coding              | ENSSSCT0 -1                         |             |
| 4 | 1.04E+08 | C    | G   | 1037.16 | 144  | 0/0 | 0/1 | 0/1 | 0/1 | 0/1 | 0/1 | 1/1 | intergenic  | MODIFIER NONE |                          | -1 | ENSSSCG0000006533-ZBTB78            | -1                                  |             |
| 4 | 1.3E+08  | GA   | G   | 1112.08 | 164  | 0/0 | 0/1 | 0/1 | 0/1 | 0/1 | 1/1 | 1/1 | intergenic  | MODIFIER NONE |                          | -1 | ENSSSCG0000006870-SLC35A3           | -1                                  |             |
| 4 | 9016480  | T    | A   | 1259.96 | 195  | 1/1 | 1/1 | 1/1 | 1/1 | 1/1 | 1/1 | ./  | 0/0         | intergenic    | MODIFIER NONE            |    | -1                                  | ENSSSCG00000024124-ENSSSCG000000022 | -1          |
| 4 | 9018024  | G    | A   | 1430.91 | 144  | 1/1 | 1/1 | 1/1 | 1/1 | 1/1 | 1/1 | 0/0 | intergenic  | MODIFIER NONE |                          | -1 | ENSSSCG00000024124-ENSSSCG000000022 | -1                                  |             |
| 4 | 35485513 | CT   | C   | 1981.55 | 214  | 1/1 | 1/1 | 1/1 | 1/1 | 1/1 | 1/1 | 0/0 | intron_vari | MODIFIER NONE | c.137-7728delT           | -1 | LRP12                               | protein_coding                      | ENSSSCT0 2  |
| 4 | 45216561 | A    | G   | 1527.31 | 122  | 1/1 | 1/1 | 1/1 | 1/1 | 1/1 | 1/1 | ./  | 0/0         | intergenic    | MODIFIER NONE            |    | -1                                  | INTS8-DPY19L4                       | -1          |
| 4 | 1.22E+08 | T    | G   | 4592.32 | 155  | 1/1 | 1/1 | 1/1 | 1/1 | 1/1 | 1/1 | 0/0 | intergenic  | MODIFIER NONE |                          | -1 | FAM102B-SCAMC-1                     | -1                                  |             |
| 4 | 1.24E+08 | T    | C   | 1413.31 | 128  | 1/1 | 1/1 | 1/1 | 1/1 | 1/1 | 1/1 | 0/0 | intergenic  | MODIFIER NONE |                          | -1 | ENSSSCG0000006853-U6                | -1                                  |             |
| 4 | 1.25E+08 | TC   | T   | 2908.45 | 212  | 1/1 | 1/1 | 1/1 | 1/1 | 1/1 | 1/1 | 0/0 | intergenic  | MODIFIER NONE |                          | -1 | U6-ENSSSCG00000025216               | -1                                  |             |
| 4 | 1.25E+08 | AAAC | A   | 3378.8  | 189  | 1/1 | 1/1 | 1/1 | 1/1 | 1/1 | 1/1 | 0/0 | intergenic  | MODIFIER NONE | n.null_nulldelAAC        | -1 | U6-ENSSSCG00000025216               | -1                                  |             |
| 5 | 7578522  | G    | C   | 1089.97 | 137  | 0/0 | 0/1 | 0/1 | 0/1 | 0/1 | 0/1 | 1/1 | intron_vari | MODIFIER NONE | c.4813-167C>G            | -1 | ENSSSCG protein_coding              | ENSSSCT0 15                         |             |
| 5 | 9089370  | C    | CT  | 2230.04 | 216  | 0/0 | 0/0 | 0/0 | 0/0 | 1/1 | 1/1 | 1/1 | intron_vari | MODIFIER NONE | c.3101-81_3101-80in      | -1 | MYH9                                | protein_coding                      | ENSSSCT0 24 |
| 5 | 27974160 | A    | G   | 1202.27 | 146  | 0/0 | 0/0 | 0/1 | 0/1 | 1/1 | 1/1 | 0/1 | 1/1         | intergenic    | MODIFIER NONE            |    | -1                                  | U6-ENSSSCG00000000457               | -1          |
| 5 | 69132974 | GA   | G   | 2087.8  | 234  | 0/0 | 0/0 | 0/1 | 1/1 | 1/1 | 0/1 | 1/1 | 1/1         | intergenic    | MODIFIER NONE            |    | -1                                  | PRMT8-ENSSSCG00000000734            | -1          |
| 5 | 33392417 | T    | C   | 1910.95 | 138  | 1/1 | 1/1 | 1/1 | 0/1 | 0/1 | 1/1 | 0/0 | intron_vari | MODIFIER NONE | c.249+2661T>C            | -1 | HMG2                                | protein_coding                      | ENSSSCT0 3  |
| 5 | 33392433 | G    | T   | 1170.46 | 121  | 1/1 | 1/1 | 1/1 | 0/1 | 0/1 | 1/1 | 0/0 | intron_vari | MODIFIER NONE | c.249+2677G>T            | -1 | HMG2                                | protein_coding                      | ENSSSCT0 3  |
| 5 | 33394214 | A    | G   | 1291.83 | 141  | 1/1 | 1/1 | 1/1 | 0/1 | 0/1 | 1/1 | 0/0 | intron_vari | MODIFIER NONE | c.249+4458A>G            | -1 | HMG2                                | protein_coding                      | ENSSSCT0 3  |
| 5 | 40150123 | A    | C   | 1168.24 | 140  | 1/1 | 1/1 | 1/1 | 0/1 | 0/1 | 1/1 | 0/0 | intergenic  | MODIFIER NONE |                          | -1 | U4-ENSSSCG00000023758               | -1                                  |             |
| 5 | 47253705 | A    | G   | 1737.49 | 160  | 1/1 | 1/1 | 1/1 | 0/1 | 0/1 | 1/1 | 0/0 | intron_vari | MODIFIER NONE | c.555-11068A>G           | -1 | ENSSSCG protein_coding              | ENSSSCT0 3                          |             |
| 5 | 67490871 | G    | GCA | 3401.17 | 233  | 1/1 | 1/1 | 1/1 | 0/0 | 0/0 | 1/1 | 0/0 | intergenic  | MODIFIER NONE | n.null_nullinsCA         | -1 | ANO2-KV1.5                          | -1                                  |             |
| 5 | 69456012 | GA   | G   | 1469.67 | 218  | 1/1 | 1/1 | 1/1 | 0/1 | 1/1 | 0/1 | 0/0 | intron_vari | MODIFIER NONE | c.-29-657delT            | -1 | TEAD4                               | protein_coding                      | ENSSSCT0 2  |
| 6 | 17071811 | A    | C   | 1049.52 | 1905 | 0/0 | 0/1 | 0/1 | 1/1 | 1/1 | 1/1 | 1/1 | intergenic  | MODIFIER NONE |                          | -1 | CDH3-RSPRY1                         | -1                                  |             |
| 6 | 29037648 | A    | G   | 1211.43 | 115  | 0/0 | 0/1 | 0/1 | 1/1 | 1/1 | 1/1 | 1/1 | intergenic  | MODIFIER NONE |                          | -1 | ENSSSCG00000002834-TOX3             | -1                                  |             |
| 6 | 31093904 | A    | G   | 1081.53 | 127  | 0/0 | 0/1 | 0/1 | 1/1 | 1/1 | 1/1 | 1/1 | intergenic  | MODIFIER NONE |                          | -1 | ZNF423-N4BP1                        | -1                                  |             |
| 6 | 59974516 | T    | C   | 1514.54 | 134  | 0/0 | 0/1 | 0/1 | 1/1 | 1/1 | 1/1 | 1/1 | intergenic  | MODIFIER NONE |                          | -1 | ENSSSCG00000003361-C1orf174         | -1                                  |             |
| 6 | 75048956 | T    | C   | 1056.88 | 139  | 0/0 | 0/1 | 0/1 | 1/1 | 1/1 | 0/1 | 1/1 | intron_vari | MODIFIER NONE | c.1405-11327T>C          | -1 | KDM1A                               | protein_coding                      | ENSSSCT0 11 |
| 6 | 78665344 | GA   | G   | 1779.58 | 202  | 0/0 | 0/0 | 0/1 | 0/1 | 0/1 | 1/1 | 1/1 | intron_vari | MODIFIER NONE | c.572-1071delT           | -1 | EYA3                                | protein_coding                      | ENSSSCT0 4  |
| 6 | 81281307 | G    | GT  | 2735.98 | 183  | 0/0 | 0/1 | 1/1 | 1/1 | 0/1 | 0/1 | 1/1 | intron_vari | MODIFIER NONE | c.820-502_820-501in      | -1 | SDC3                                | protein_coding                      | ENSSSCT0 2  |
| 6 | 84569119 | CG   | C   | 3720.18 | 245  | 0/0 | 0/0 | 0/1 | 0/1 | 0/1 | 1/1 | 1/1 | intergenic  | MODIFIER NONE |                          | -1 | C1orf94-ENSSSCG00000003624          | -1                                  |             |
| 6 | 10060732 | A    | G   | 1476.56 | 141  | 1/1 | 1/1 | 1/1 | 1/1 | 1/1 | 0/1 | 0/0 | intron_vari | MODIFIER NONE | c.230+1050T>C            | -1 | VAT1L                               | protein_coding                      | ENSSSCT0 1  |
| 6 | 23030258 | C    | A   | 3401.38 | 239  | 1/1 | 0/1 | 0/1 | 0/1 | 0/1 | 0/1 | 0/0 | intergenic  | MODIFIER NONE |                          | -1 | U2-CDH11                            | -1                                  |             |
| 6 | 32768657 | G    | A   | 5142.53 | 311  | 1/1 | 1/1 | 1/1 | 1/1 | 1/1 | 0/1 | 0/0 | intergenic  | MODIFIER NONE |                          | -1 | ENSSSCG00000026318-GPT2             | -1                                  |             |
| 6 | 60068443 | G    | A   | 1369.15 | 162  | 1/1 | 1/1 | 1/1 | 1/1 | 1/1 | 1/1 | 0/0 | intergenic  | MODIFIER NONE |                          | -1 | C1orf174-ssc-mir-4331               | -1                                  |             |
| 6 | 60500943 | G    | A   | 1575.64 | 192  | 1/1 | 1/1 | 1/1 | 0/1 | 0/1 | 1/1 | 0/0 | intergenic  | MODIFIER NONE |                          | -1 | DFFB-NPHP4                          | -1                                  |             |
| 6 | 60582914 | G    | A   | 1383.97 | 174  | 1/1 | 1/1 | 1/1 | 0/1 | 0/1 | 1/1 | 0/0 | intergenic  | MODIFIER NONE |                          | -1 | DFFB-NPHP4                          | -1                                  |             |
| 6 | 60600187 | G    | T   | 1228.13 | 151  | 1/1 | 1/1 | 1/1 | 0/1 | 0/1 | 1/1 | 0/0 | intergenic  | MODIFIER NONE |                          | -1 | DFFB-NPHP4                          | -1                                  |             |
| 6 | 75789726 | G    | T   | 5039.15 | 312  | 1/1 | 1/1 | 1/1 | 0/1 | 0/1 | 0/1 | 0/0 | intron_vari | MODIFIER NONE | c.73+1526C>A             | -1 | STPG1                               | protein_coding                      | ENSSSCT0 2  |
| 6 | 91341447 | G    | A   | 1149.68 | 149  | 1/1 | 1/1 | 1/1 | 0/0 | 0/1 | 1/1 | 0/0 | intergenic  | MODIFIER NONE |                          | -1 | ENSSSCG00000024963-ENSSSCG000000003 | -1                                  |             |
| 7 | 23717326 | T    | A   | 1022.24 | 121  | 1/1 | 1/1 | 1/1 | 1/1 | 1/1 | 1/1 | 0/0 | intergenic  | MODIFIER NONE |                          | -1 | ENSSSCG00000001196-ENSSSCG000000022 | -1                                  |             |
| 7 | 27945935 | G    | T   | 1939.72 | 172  | 1/1 | 1/1 | 1/1 | 0/1 | 1/1 | 1/1 | 0/0 | intron_vari | MODIFIER NONE | c.2234-385C>A            | -1 | ENSSSCG protein_coding              | ENSSSCT0 7                          |             |
| 7 | 30942918 | A    | G   | 1668.46 | 143  | 1/1 | 1/1 | 1/1 | 1/1 | 1/1 | 0/1 | 0/0 | intergenic  | MODIFIER NONE |                          | -1 | FAM83B-ENSSSCG00000001484           | -1                                  |             |
| 7 | 32887747 | C    | T   | 1395.69 | 145  | 1/1 | 1/1 | 1/1 | 1/1 | 1/1 | 0/1 | 0/0 | intron_vari | MODIFIER NONE | c.694-9287G>A            | -1 | ENSSSCG protein_coding              | ENSSSCT0 7                          |             |
| 7 | 33397853 | C    | G   | 1330.04 | 137  | 1/1 | 1/1 | 1/1 | 1/1 | 1/1 | 0/1 | 0/0 | intergenic  | MODIFIER NONE |                          | -1 | ENSSSCG00000025172-DST              | -1                                  |             |
| 7 | 33457871 | A    | G   | 1236.56 | 128  | 1/1 | 1/1 | 1/1 | 1/1 | 1/1 | 1/1 | 0/0 | intergenic  | MODIFIER NONE |                          | -1 | ENSSSCG00000025172-DST              | -1                                  |             |
| 7 | 33460465 | C    | T   | 1195.57 | 142  | 1/1 | 1/1 | 1/1 | 1/1 | 1/1 | 0/1 | 0/0 | intergenic  | MODIFIER NONE |                          | -1 | ENSSSCG00000025172-DST              | -1                                  |             |
| 7 | 35907715 | G    | C   | 1119.49 | 124  | 1/1 | 1/1 | 1/1 | 1/1 | 1/1 | 1/1 | 0/0 | intron_vari | MODIFIER NONE | c.272-33079C>G           | -1 | SCUBE3                              | protein_coding                      | ENSSSCT0 2  |
| 7 | 38825386 | G    | A   | 1070.45 | 110  | 1/1 | 1/1 | 1/1 | 1/1 | 1/1 | 0/1 | 0/0 | intron_vari | MODIFIER NONE | c.29-33123G>A            | -1 | ENSSSCG protein_coding              | ENSSSCT0 1                          |             |
| 7 | 51077725 | C    | T   | 1593.19 | 146  | 1/1 | 1/1 | 1/1 | 1/1 | 1/1 | 1/1 | 0/0 | intergenic  | MODIFIER NONE |                          | -1 | TFAP2D-ENSSSCG00000025535           | -1                                  |             |
| 7 | 52012140 | C    | G   | 1371.3  | 160  | 1/1 | 1/1 | 1/1 | 0/1 | 0/1 | 0/1 | 0/0 | intergenic  | MODIFIER NONE |                          | -1 | ENSSSCG00000028857-ENSSSCG000000001 | -1                                  |             |
| 7 | 52012211 | G    | A   | 1202.75 | 152  | 1/1 | 1/1 | 0/1 | 0/1 | 0/1 | 0/1 | 0/0 | intergenic  | MODIFIER NONE |                          | -1 | ENSSSCG00000028857-ENSSSCG000000001 | -1                                  |             |
| 7 | 52012263 | C    | G   | 1104.48 | 151  | 1/1 | 1/1 | 0/1 | 0/1 | 0/1 | 0/1 | 0/0 | intergenic  | MODIFIER NONE |                          | -1 | ENSSSCG00000028857-ENSSSCG000000001 | -1                                  |             |
| 7 | 1.21E+08 | A    | T   | 1508.1  | 131  | 1/1 | 1/1 | 1/1 | 1/1 | 1/1 | 0/1 | 0/0 | intron_vari | MODIFIER NONE | c.2438-5174A>T           | -1 | ENSSSCG protein_coding              | ENSSSCT0 8                          |             |
| 8 | 5768168  | AG   | A   | 1536.66 | 196  | 0/0 | 0/1 | 0/1 | 1/1 | 1/1 | 0/1 | 1/1 | intergenic  | MODIFIER NONE |                          | -1 | TMEM128-LYAR                        | -1                                  |             |
| 8 | 21945383 | A    | G   | 1116.71 | 139  | 0/0 | 0/1 | 1/1 | 1/1 | 1/1 | 0/1 | 1/1 | intergenic  | MODIFIER NONE |                          | -1 | 7SK-ENSSSCG000000008763             | -1                                  |             |
| 8 | 21945384 | TC   | C   | 1257.37 | 140  | 0/0 | 0/1 | 1/1 | 1/1 | 1/1 | 1/1 | 1/1 | intergenic  | MODIFIER NONE |                          | -1 | 7SK-ENSSSCG000000008763             | -1                                  |             |
| 8 | 23009229 | CG   | C   | 1080.68 | 241  | 0/0 | 0/0 | 0/0 | 1/1 | 1/1 | 1/1 | 1/1 | intergenic  | MODIFIER NONE |                          | -1 | ENSSSCG00000008763-PCDH7            | -1                                  |             |
| 8 | 26874123 | A    | C   | 1342.97 | 136  | 0/0 | 0/1 | 0/1 | 1/1 | 1/1 | 1/1 | 1/1 | intergenic  | MODIFIER NONE |                          | -1 | PCDH7-ENSSSCG000000008767           | -1                                  |             |
| 8 | 39555553 | T    | TTA | 4723.47 | 227  | 0/0 | 0/0 | 0/0 | 1/1 | 1/1 | 1/1 | 1/1 | intron_vari | MODIFIER NONE | c.2411+1756_2411+1       | -1 | CORIN                               | protein_coding                      | ENSSSCT0 16 |
| 8 | 45200463 | CT   | C   | 2816.01 | 228  | 0/0 | 0/1 | 0/0 | 0/0 | 1/1 | 1/1 | 1/1 | intergenic  | MODIFIER NONE |                          | -1 | ENSSSCG00000024269-CPE              | -1                                  |             |
| 8 | 2668800  | G    | A   | 2410.49 | 154  | 1/1 | 1/1 | 1/1 | 0/1 | 0/1 | 1/1 | 0/0 | intergenic  | MODIFIER NONE |                          | -1 | C4orf50-JAKMIP1                     | -1                                  |             |
| 8 | 9493642  | AAAC | A   | 1538.8  | 300  | 1/1 | 0/1 | 1/1 | 0/1 | 0/1 | 0/1 | 0/0 | intergenic  | MODIFIER NONE | n.null_nulldelAAC        | -1 | BOD1L1-CPEB2                        | -1                                  |             |
| 8 | 9589033  | T    | C   | 1016.22 | 168  | 1/1 | 1/1 | 1/1 | 1/1 | 0/1 | 0/1 | 1/1 | intergenic  | MODIFIER NONE |                          | -1 | BOD1L1-CPEB2                        | -1                                  |             |
| 8 | 9589091  | T    | C   | 1618.95 | 158  | 1/1 | 1/1 | 1/1 | 0/1 | 0/1 | 1/1 | 0/0 | intergenic  | MODIFIER NONE |                          | -1 | BOD1L1-CPEB2                        | -1                                  |             |
| 8 | 32060822 | AC   | A   | 3262.27 | 219  | 1/1 | 0/1 | 1/1 | 0/1 | 0/1 | 0/1 | 0/0 | intergenic  | MODIFIER NONE |                          | -1 | ENSSSCG00000030201-WDR19            | -1                                  |             |

|    |          |     |        |         |     |     |     |     |     |     |     |     |                           |                     |                                      |             |
|----|----------|-----|--------|---------|-----|-----|-----|-----|-----|-----|-----|-----|---------------------------|---------------------|--------------------------------------|-------------|
| 8  | 75790028 | G   | A      | 3313.66 | 386 | 1/1 | 1/1 | 1/1 | 0/0 | 0/0 | 0/1 | 0/0 | intergenic, MODIFIER NONE | -1                  | SDAD1-CXCL9                          | -1          |
| 8  | 91358977 | T   | A      | 1570.86 | 200 | 1/1 | 1/1 | 1/1 | 1/1 | 1/1 | 0/1 | 0/0 | intergenic, MODIFIER NONE | -1                  | ENSSSCG00000009052-RNF150            | -1          |
| 8  | 91368760 | C   | A      | 1054.41 | 107 | 1/1 | 1/1 | 1/1 | 1/1 | 1/1 | 0/1 | 0/0 | intergenic, MODIFIER NONE | -1                  | ENSSSCG00000009052-RNF150            | -1          |
| 8  | 91368764 | T   | C      | 1009.58 | 106 | 1/1 | 1/1 | 1/1 | 1/1 | 1/1 | 0/1 | 0/0 | intergenic, MODIFIER NONE | -1                  | ENSSSCG00000009052-RNF150            | -1          |
| 8  | 91409824 | T   | C      | 1056.84 | 151 | 1/1 | 1/1 | 1/1 | 1/1 | 1/1 | 0/1 | 0/0 | intergenic, MODIFIER NONE | -1                  | ENSSSCG00000009052-RNF150            | -1          |
| 8  | 91480263 | A   | G      | 1033.28 | 130 | 1/1 | 1/1 | 1/1 | 1/1 | 1/1 | 0/1 | 0/0 | intergenic, MODIFIER NONE | -1                  | ENSSSCG00000009052-RNF150            | -1          |
| 8  | 91484661 | T   | C      | 1304.76 | 134 | 1/1 | 1/1 | 1/1 | 1/1 | 1/1 | 0/1 | 0/0 | intergenic, MODIFIER NONE | -1                  | ENSSSCG00000009052-RNF150            | -1          |
| 8  | 1.15E+08 | A   | G      | 1318.94 | 121 | 1/1 | 1/1 | 1/1 | 1/1 | 1/1 | 0/1 | 0/0 | intergenic, MODIFIER NONE | -1                  | ENSSSCG00000009117-ENSSSCG000000009  | -1          |
| 9  | 4683739  | A   | G      | 1065.02 | 152 | 0/0 | 1/1 | 1/1 | 1/1 | 1/1 | 1/1 | 1/1 | intergenic, MODIFIER NONE | -1                  | ENSSSCG000000014673-TRIM6            | -1          |
| 9  | 55737157 | G   | T      | 1022.89 | 124 | 0/0 | 0/1 | 0/1 | 1/1 | 1/1 | 1/1 | 1/1 | intergenic, MODIFIER NONE | -1                  | ENSSSCG000000015140-ENSSSCG000000015 | -1          |
| 9  | 56254834 | T   | A      | 2035.29 | 138 | 0/0 | 0/1 | 0/1 | 1/1 | 1/1 | 1/1 | 1/1 | intergenic, MODIFIER NONE | -1                  | ENSSSCG000000015162-ENSSSCG000000025 | -1          |
| 9  | 90821723 | G   | GA     | 1029.34 | 224 | 0/0 | 0/1 | 0/1 | 1/1 | 0/1 | 0/1 | 1/1 | intergenic, MODIFIER NONE | n.null_nullinsA     | ARL4A-ETV1                           | -1          |
| 9  | 91512293 | GT  | G      | 1005.36 | 271 | 0/0 | 0/0 | 0/1 | 0/1 | 0/1 | 0/1 | 1/1 | intron_vari MODIFIER NONE | c.1114-1420delA     | ETV1 protein_coding                  | ENSSSCT0 11 |
| 9  | 1E+08    | T   | TGG    | 1325.41 | 223 | 0/0 | 0/0 | 0/1 | 1/1 | 1/1 | 0/1 | 1/1 | intron_vari MODIFIER NONE | c.11403+301_11403+  | DNAH11 protein_coding                | ENSSSCT0 71 |
| 9  | 1E+08    | G   | A      | 1425.94 | 173 | 0/0 | 0/1 | 0/1 | 1/1 | 1/1 | 0/1 | 1/1 | intron_vari MODIFIER NONE | c.12103-726G>A      | DNAH11 protein_coding                | ENSSSCT0 75 |
| 9  | 1E+08    | A   | C      | 1166.23 | 168 | 0/0 | 0/1 | 0/1 | 1/1 | 1/1 | 0/1 | 1/1 | intron_vari MODIFIER NONE | c.12103-708A>C      | DNAH11 protein_coding                | ENSSSCT0 75 |
| 9  | 1.01E+08 | A   | G      | 1067.48 | 130 | 0/0 | 0/1 | 0/1 | 1/1 | 1/1 | 0/1 | 1/1 | upstream_ MODIFIER NONE   | c.-64A>G            | IL6 protein_coding                   | ENSSSCT0 -1 |
| 9  | 1.01E+08 | A   | G      | 1067.48 | 130 | 0/0 | 0/1 | 0/1 | 1/1 | 1/1 | 0/1 | 1/1 | intergenic, MODIFIER NONE |                     | TOMM7-IL6                            | -1          |
| 9  | 16757028 | A   | AC     | 1021.99 | 232 | 1/1 | 1/1 | 1/1 | 1/1 | 1/1 | 0/1 | 0/0 | intergenic, MODIFIER NONE | n.null_nullinsC     | ENSSSCG000000014896-U6               | -1          |
| 9  | 29131911 | T   | C      | 1176.04 | 149 | 1/1 | 1/1 | 1/1 | 1/1 | 1/1 | 0/0 | 0/0 | intron_vari MODIFIER NONE | c.-26-1780T>C       | ENSSSCG protein_coding               | ENSSSCT0 2  |
| 9  | 45966872 | A   | G      | 1522.75 | 115 | 1/1 | 1/1 | 1/1 | 1/1 | 1/1 | 1/1 | 0/0 | intergenic, MODIFIER NONE |                     | DRD2-U6                              | -1          |
| 9  | 55801778 | A   | G      | 1633.51 | 150 | 1/1 | 1/1 | 1/1 | 1/1 | 1/1 | 1/1 | 0/0 | intron_vari MODIFIER NONE | c.585-827T>C        | ENSSSCG protein_coding               | ENSSSCT0 4  |
| 9  | 55853043 | CT  | C      | 2191.44 | 202 | 1/1 | 1/1 | 1/1 | 0/1 | 1/1 | 1/1 | 0/0 | intergenic, MODIFIER NONE |                     | ENSSSCG000000024299-ZNF202           | -1          |
| 9  | 62639271 | TA  | T      | 1317.69 | 202 | 1/1 | 1/1 | 1/1 | 0/1 | 0/1 | 0/0 | 0/0 | intergenic, MODIFIER NONE |                     | BARX2-SNORD112                       | -1          |
| 9  | 73656311 | CT  | C      | 2141.82 | 193 | 1/1 | 1/1 | 1/1 | 1/1 | 1/1 | 1/1 | 0/0 | upstream_ MODIFIER NONE   | c.-1delA            | DYRK3 protein_coding                 | ENSSSCT0 -1 |
| 9  | 73656311 | CT  | C      | 2141.82 | 193 | 1/1 | 1/1 | 1/1 | 1/1 | 1/1 | 1/1 | 0/0 | intergenic, MODIFIER NONE |                     | DYRK3-ENSSSCG000000015650            | -1          |
| 9  | 75774162 | A   | G      | 5306.54 | 307 | 1/1 | 1/1 | 1/1 | 1/1 | 1/1 | 0/1 | 0/0 | intergenic, MODIFIER NONE |                     | U6-ZNF804B                           | -1          |
| 9  | 86160521 | C   | T      | 6404.54 | 260 | 1/1 | 1/1 | 1/1 | 1/1 | 1/1 | 0/1 | 0/0 | intergenic, MODIFIER NONE |                     | U1-ENSSSCG000000015346               | -1          |
| 9  | 1.22E+08 | G   | GT     | 2286.16 | 274 | 1/1 | 1/1 | 1/1 | 1/1 | 1/1 | 0/1 | 0/0 | intergenic, MODIFIER NONE | n.null_nullinsT     | ENSSSCG000000015460-ENSSSCG000000021 | -1          |
| 9  | 1.34E+08 | T   | C      | 2700.16 | 457 | 1/1 | 1/1 | 1/1 | 1/1 | 1/1 | 1/1 | 0/0 | intergenic, MODIFIER NONE |                     | XPRI-KJAA1614                        | -1          |
| 10 | 29938018 | A   | C      | 3839.15 | 362 | 0/0 | 0/1 | 0/1 | 1/1 | 1/1 | 0/1 | 1/1 | intergenic, MODIFIER NONE |                     | ENSSSCG000000010935-ENSSSCG000000010 | -1          |
| 10 | 64031898 | A   | G      | 1811.04 | 138 | 0/0 | 0/1 | 0/1 | 1/1 | 1/1 | 1/1 | 1/1 | intergenic, MODIFIER NONE |                     | GJD4-CDC3                            | -1          |
| 10 | 13394424 | CG  | C      | 1884.53 | 186 | 1/1 | 1/1 | 1/1 | 1/1 | 1/1 | 1/1 | 0/0 | intergenic, MODIFIER NONE |                     | DUSP10-HIPL2                         | -1          |
| 10 | 32908624 | C   | CT     | 1235.55 | 206 | 1/1 | 0/1 | 1/1 | 0/0 | 0/1 | 1/1 | 0/0 | intergenic, MODIFIER NONE | n.null_nullinsT     | DAPK1-ZCCHC6                         | -1          |
| 10 | 38489003 | T   | G      | 1998.66 | 180 | 1/1 | 1/1 | 1/1 | 0/1 | 0/1 | 1/1 | 0/0 | intergenic, MODIFIER NONE |                     | SNORA31-SNORA31                      | -1          |
| 10 | 38853301 | TAA | T      | 3562.76 | 182 | 1/1 | 1/1 | 1/1 | 0/0 | 0/0 | 1/1 | 0/0 | intergenic, MODIFIER NONE | n.null_nulldelAA    | SNORA31-U6                           | -1          |
| 10 | 44424052 | G   | A      | 2388.15 | 279 | 1/1 | 1/1 | 1/1 | 0/1 | 0/0 | 1/1 | 0/0 | intergenic, MODIFIER NONE |                     | BAMBI-ENSSSCG000000011017            | -1          |
| 10 | 44424058 | T   | C      | 2818.19 | 289 | 1/1 | 1/1 | 1/1 | 0/0 | 0/0 | 1/1 | 0/0 | intergenic, MODIFIER NONE |                     | BAMBI-ENSSSCG000000011017            | -1          |
| 10 | 48437750 | G   | A      | 1529.84 | 126 | 1/1 | 1/1 | 1/1 | 0/1 | 0/1 | 0/1 | 0/0 | intergenic, MODIFIER NONE |                     | STR8IA6-ENSSSCG000000011035          | -1          |
| 10 | 48593344 | C   | A      | 1933.02 | 171 | 1/1 | 1/1 | 1/1 | 0/1 | 0/1 | 1/1 | 0/0 | intergenic, MODIFIER NONE |                     | STR8IA6-ENSSSCG000000011035          | -1          |
| 10 | 48617088 | G   | A      | 1028.86 | 117 | 1/1 | 1/1 | 1/1 | 0/1 | 0/1 | 1/1 | 0/0 | intron_vari MODIFIER NONE | c.11+2490C>T        | ENSSSCG protein_coding               | ENSSSCT0 1  |
| 10 | 51413315 | G   | GA     | 1716.06 | 184 | 1/1 | 1/1 | 1/1 | 0/1 | 0/0 | 1/1 | 0/0 | upstream_ MODIFIER NONE   | c.-150_-150insA     | NMT2 protein_coding                  | ENSSSCT0 -1 |
| 10 | 51413315 | G   | GA     | 1716.06 | 184 | 1/1 | 1/1 | 1/1 | 0/1 | 0/0 | 1/1 | 0/0 | intergenic, MODIFIER NONE | n.null_nullinsA     | U6-NMT2                              | -1          |
| 10 | 57034243 | A   | AAACCC | 7505.61 | 207 | 1/1 | 1/1 | 1/1 | 0/1 | 0/1 | 1/1 | 0/0 | intergenic, MODIFIER NONE | n.null_nullinsAACCC | ENSSSCG000000022730-ENSSSCG000000011 | -1          |
| 10 | 62544164 | G   | A      | 1554.13 | 163 | 1/1 | 1/1 | 1/1 | 0/1 | 0/1 | 1/1 | 0/0 | intergenic, MODIFIER NONE |                     | NRP1-ENSSSCG000000011103             | -1          |
| 10 | 62544168 | T   | G      | 1802    | 162 | 1/1 | 1/1 | 1/1 | 0/1 | 0/1 | 1/1 | 0/0 | intergenic, MODIFIER NONE |                     | NRP1-ENSSSCG000000011103             | -1          |
| 10 | 63095377 | G   | GA     | 2400.82 | 215 | 1/1 | 1/1 | 1/1 | 0/1 | 0/1 | 1/1 | 0/0 | intergenic, MODIFIER NONE | n.null_nullinsA     | ENSSSCG000000011103-CUL2             | -1          |
| 11 | 71093622 | A   | T      | 1221.43 | 211 | 0/0 | 0/1 | 0/1 | 1/1 | 1/1 | 0/1 | 1/1 | intron_vari MODIFIER NONE | c.273+592A>T        | ENSSSCG protein_coding               | ENSSSCT0 2  |
| 11 | 80970713 | G   | A      | 1544.19 | 140 | 0/0 | 0/1 | 0/1 | 1/1 | 1/1 | 0/1 | 1/1 | intergenic, MODIFIER NONE |                     | ENSSSCG000000026317-EFNB2            | -1          |
| 11 | 37797467 | G   | T      | 1017.02 | 135 | 1/1 | 1/1 | 1/1 | 0/1 | 0/1 | 1/1 | 0/0 | intergenic, MODIFIER NONE |                     | SNORA31-ENSSSCG000000024171          | -1          |
| 11 | 51921183 | C   | A      | 1009.08 | 144 | 1/1 | 1/1 | 1/1 | 1/1 | 1/1 | 1/1 | 0/0 | intergenic, MODIFIER NONE |                     | KLFS-ENSSSCG000000009465             | -1          |
| 11 | 51921220 | A   | G      | 1346.54 | 142 | 1/1 | 1/1 | 1/1 | 1/1 | 1/1 | 1/1 | 0/0 | intergenic, MODIFIER NONE |                     | KLFS-ENSSSCG000000009465             | -1          |
| 11 | 51932409 | G   | A      | 1045.83 | 140 | 1/1 | 1/1 | 1/1 | 1/1 | 1/1 | 1/1 | 0/0 | intergenic, MODIFIER NONE |                     | KLFS-ENSSSCG000000009465             | -1          |
| 11 | 52118232 | A   | G      | 1134.77 | 136 | 1/1 | 1/1 | 1/1 | 1/1 | 1/1 | 1/1 | 0/0 | intergenic, MODIFIER NONE |                     | KLFS-ENSSSCG000000009465             | -1          |
| 11 | 52134003 | C   | T      | 1699.49 | 143 | 1/1 | 1/1 | 1/1 | 1/1 | 1/1 | 1/1 | 0/0 | intergenic, MODIFIER NONE |                     | KLFS-ENSSSCG000000009465             | -1          |
| 11 | 52818703 | A   | C      | 2078.5  | 253 | 1/1 | 1/1 | 1/1 | 1/1 | 1/1 | 1/1 | 0/0 | intergenic, MODIFIER NONE |                     | LMO7-KCTD12                          | -1          |
| 11 | 53248011 | T   | C      | 1442.41 | 133 | 1/1 | 1/1 | 1/1 | 1/1 | 1/1 | 1/1 | 0/0 | intergenic, MODIFIER NONE |                     | LMO7-KCTD12                          | -1          |
| 11 | 53248023 | A   | G      | 1486.66 | 141 | 1/1 | 1/1 | 1/1 | 1/1 | 1/1 | 1/1 | 0/0 | intergenic, MODIFIER NONE |                     | LMO7-KCTD12                          | -1          |
| 11 | 53261058 | T   | C      | 2019.53 | 167 | 1/1 | 1/1 | 1/1 | 1/1 | 1/1 | 1/1 | 0/0 | intergenic, MODIFIER NONE |                     | LMO7-KCTD12                          | -1          |
| 11 | 53286966 | A   | C      | 1110.59 | 162 | 1/1 | 1/1 | 1/1 | 1/1 | 1/1 | 1/1 | 0/0 | intergenic, MODIFIER NONE |                     | LMO7-KCTD12                          | -1          |
| 11 | 55435086 | C   | G      | 1805.99 | 151 | 1/1 | 1/1 | 1/1 | 1/1 | 1/1 | 1/1 | 0/0 | intron_vari MODIFIER NONE | c.639-1315G>C       | RNF219 protein_coding                | ENSSSCT0 5  |
| 11 | 62041272 | G   | A      | 1574.61 | 148 | 1/1 | 1/1 | 1/1 | 0/1 | 1/1 | 1/1 | 0/0 | intergenic, MODIFIER NONE |                     | SLITRK6-ENSSSCG000000024241          | -1          |
| 11 | 62971203 | A   | C      | 1353.84 | 144 | 1/1 | 1/1 | 1/1 | 1/1 | 1/1 | 1/1 | 0/0 | intergenic, MODIFIER NONE |                     | ENSSSCG000000024241-ENSSSCG000000029 | -1          |
| 11 | 69609751 | T   | C      | 1278.55 | 163 | 1/1 | 1/1 | 1/1 | 1/1 | 1/1 | 1/1 | 0/0 | upstream_ MODIFIER NONE   | c.-1T>C             | GPC6 protein_coding                  | ENSSSCT0 -1 |
| 11 | 69609751 | T   | C      | 1278.55 | 163 | 1/1 | 1/1 | 1/1 | 1/1 | 1/1 | 1/1 | 0/0 | intergenic, MODIFIER NONE |                     | U6-GPC6                              | -1          |
| 11 | 75430106 | C   | G      | 1822.31 | 125 | 1/1 | 1/1 | 1/1 | 1/1 | 1/1 | 1/1 | 0/0 | upstream_ MODIFIER NONE   | c.-253G>C           | ENSSSCG protein_coding               | ENSSSCT0 -1 |
| 11 | 75430106 | C   | G      | 1822.31 | 125 | 1/1 | 1/1 | 1/1 | 1/1 | 1/1 | 1/1 | 0/0 | intron_vari MODIFIER NONE | c.389+14866C>G      | UBAC2 protein_coding                 | ENSSSCT0 4  |

|    |          |         |       |         |     |     |     |     |     |     |     |     |             |               |                      |                    |                                     |                            |            |
|----|----------|---------|-------|---------|-----|-----|-----|-----|-----|-----|-----|-----|-------------|---------------|----------------------|--------------------|-------------------------------------|----------------------------|------------|
| 11 | 77206321 | T       | C     | 1797.4  | 124 | 1/1 | 1/1 | 1/1 | 1/1 | 1/1 | 1/1 | 0/0 | intron_vari | MODIFIER NONE | c.490-7801>C         | -1                 | ENSSSCG protein_coding              | ENSSSCT0 3                 |            |
| 11 | 79497765 | A       | AT    | 1627.41 | 232 | 1/1 | 1/1 | 1/1 | 1/1 | 1/1 | 1/1 | 0/0 | intergenic  | MODIFIER NONE | n.null_nullinsT      | -1                 | ENSSSCG00000026317-EFNB2            | -1                         |            |
| 12 | 4457448  | C       | T     | 5009.15 | 276 | 1/1 | 1/1 | 1/1 | 1/1 | 0/1 | 0/1 | 0/0 | intergenic  | MODIFIER NONE |                      | -1                 | MGAT5B-ENSSSCG00000026070           | -1                         |            |
| 12 | 22828565 | T       | C     | 1095.34 | 137 | 1/1 | 1/1 | 1/1 | 1/1 | 1/1 | 1/1 | 0/0 | intron_vari | MODIFIER NONE | c.707-168A>G         | -1                 | ENSSSCG protein_coding              | ENSSSCT0 5                 |            |
| 12 | 22828628 | C       | A     | 1690.67 | 151 | 1/1 | 1/1 | 1/1 | 1/1 | 1/1 | 1/1 | 0/0 | intron_vari | MODIFIER NONE | c.707-231G>T         | -1                 | ENSSSCG protein_coding              | ENSSSCT0 5                 |            |
| 12 | 39014754 | A       | G     | 1175.76 | 111 | 1/1 | 1/1 | 1/1 | 1/1 | 0/1 | 0/1 | 1/1 | 0/0         | intron_vari   | MODIFIER NONE        | c.202+7654T>C      | -1                                  | BCAS3 protein_coding       | ENSSSCT0 4 |
| 12 | 44075390 | C       | CT    | 2390.21 | 193 | 1/1 | 1/1 | 1/1 | 0/1 | 0/1 | 1/1 | 0/0 | intron_vari | MODIFIER NONE | c.2122-323_2122-322  | -1                 | MYO1D protein_coding                | ENSSSCT0 17                |            |
| 12 | 46470807 | C       | A     | 1409.47 | 150 | 1/1 | 1/1 | 1/1 | 1/1 | 1/1 | 1/1 | 0/0 | intergenic  | MODIFIER NONE |                      | -1                 | NLK-ENSSSCG00000017756              | -1                         |            |
| 12 | 48770304 | A       | G     | 1471.42 | 134 | 1/1 | 1/1 | 1/1 | 1/1 | 0/1 | 1/1 | 0/1 | 0/0         | intergenic    | MODIFIER NONE        |                    | -1                                  | BHLHA9-U6                  | -1         |
| 13 | 403773   | C       | CA    | 3243.74 | 202 | 0/0 | 0/0 | 0/1 | 1/1 | 1/1 | 1/1 | 1/1 | 1/1         | intron_vari   | MODIFIER NONE        | c.180+44121_180+44 | -1                                  | ENSSSCG protein_coding     | ENSSSCT0 1 |
| 13 | 1.87E+08 | G       | GA    | 1764.93 | 238 | 0/0 | 0/1 | 0/1 | 1/1 | 1/1 | 1/1 | 1/1 | 1/1         | intergenic    | MODIFIER NONE        | n.null_nullinsA    | -1                                  | ROBO1-ENSSSCG00000012002   | -1         |
| 13 | 8524911  | G       | GTT   | 2883.13 | 220 | 1/1 | 1/1 | 1/1 | 0/1 | 0/1 | 1/1 | 0/0 | intergenic  | MODIFIER NONE | n.null_nullinsTT     | -1                 | ENSSSCG00000011206-ZNF385D          | -1                         |            |
| 13 | 28093169 | G       | C     | 1348.71 | 131 | 1/1 | 1/1 | 1/1 | 1/1 | 1/1 | 1/1 | 0/0 | intron_vari | MODIFIER NONE | c.291-17330C>G       | -1                 | ENSSSCG protein_coding              | ENSSSCT0 3                 |            |
| 13 | 68322864 | G       | T     | 1007.55 | 150 | 1/1 | 1/1 | 1/1 | 1/1 | 1/1 | 1/1 | 0/0 | intergenic  | MODIFIER NONE |                      | -1                 | ENSSSCG00000020679-GRM7             | -1                         |            |
| 13 | 1.37E+08 | A       | G     | 1961.92 | 140 | 1/1 | 1/1 | 1/1 | 1/1 | 1/1 | 1/1 | 0/0 | intergenic  | MODIFIER NONE |                      | -1                 | LEPREL1-CLAUDIN1                    | -1                         |            |
| 13 | 1.39E+08 | CT      | C     | 4593.04 | 231 | 1/1 | 1/1 | 1/1 | 1/1 | 1/1 | 1/1 | 0/0 | intergenic  | MODIFIER NONE |                      | -1                 | ENSSSCG00000018793-FGF12            | -1                         |            |
| 13 | 1.63E+08 | CA      | C     | 1818.43 | 222 | 1/1 | 1/1 | 1/1 | 1/1 | 0/1 | 1/1 | 0/0 | intergenic  | MODIFIER NONE |                      | -1                 | ALCAM-U1                            | -1                         |            |
| 13 | 1.71E+08 | G       | A     | 1090.69 | 234 | 1/1 | 1/1 | 1/1 | 1/1 | 1/1 | 1/1 | 0/0 | intergenic  | MODIFIER NONE |                      | -1                 | ENSSSCG00000026824-ENSSSCG000000030 | -1                         |            |
| 13 | 1.88E+08 | C       | T     | 1690.39 | 153 | 1/1 | 1/1 | 1/1 | 1/1 | 0/1 | 0/1 | 1/1 | 0/0         | intergenic    | MODIFIER NONE        |                    | -1                                  | ENSSSCG00000012002-LIPI    | -1         |
| 13 | 1.99E+08 | T       | A     | 1669.21 | 139 | 1/1 | 1/1 | 0/1 | 0/1 | 0/1 | 0/1 | 0/0 | upstream    | MODIFIER NONE | c.-38A>T             | -1                 | ENSSSCG protein_coding              | ENSSSCT0 -1                |            |
| 13 | 1.99E+08 | T       | A     | 1669.21 | 139 | 1/1 | 1/1 | 0/1 | 0/1 | 0/1 | 0/1 | 0/0 | intergenic  | MODIFIER NONE |                      | -1                 | ENSSSCG00000012021-ssc-mir-155      | -1                         |            |
| 13 | 1.99E+08 | A       | G     | 2218.57 | 158 | 1/1 | 1/1 | 1/1 | 0/1 | 0/1 | 1/1 | 0/0 | upstream    | MODIFIER NONE | c.-38T>C             | -1                 | ENSSSCG protein_coding              | ENSSSCT0 -1                |            |
| 13 | 1.99E+08 | A       | G     | 2218.57 | 158 | 1/1 | 1/1 | 1/1 | 0/1 | 0/1 | 1/1 | 0/0 | intergenic  | MODIFIER NONE |                      | -1                 | ENSSSCG00000012021-ssc-mir-155      | -1                         |            |
| 13 | 1.99E+08 | A       | G     | 2354.38 | 165 | 1/1 | 1/1 | 1/1 | 0/1 | 0/1 | 1/1 | 0/0 | upstream    | MODIFIER NONE | c.-38T>C             | -1                 | ENSSSCG protein_coding              | ENSSSCT0 -1                |            |
| 13 | 1.99E+08 | A       | G     | 2354.38 | 165 | 1/1 | 1/1 | 1/1 | 0/1 | 0/1 | 1/1 | 0/0 | intergenic  | MODIFIER NONE |                      | -1                 | ENSSSCG00000012021-ssc-mir-155      | -1                         |            |
| 13 | 1.99E+08 | G       | A     | 2322.37 | 159 | 1/1 | 1/1 | 1/1 | 0/1 | 0/1 | 1/1 | 0/0 | upstream    | MODIFIER NONE | c.-38C>T             | -1                 | ENSSSCG protein_coding              | ENSSSCT0 -1                |            |
| 13 | 1.99E+08 | G       | A     | 2322.37 | 159 | 1/1 | 1/1 | 1/1 | 0/1 | 0/1 | 1/1 | 0/0 | intergenic  | MODIFIER NONE |                      | -1                 | ENSSSCG00000012021-ssc-mir-155      | -1                         |            |
| 13 | 1.99E+08 | G       | A     | 2023.59 | 156 | 1/1 | 1/1 | 1/1 | 0/1 | 0/1 | 1/1 | 0/0 | upstream    | MODIFIER NONE | c.-38C>T             | -1                 | ENSSSCG protein_coding              | ENSSSCT0 -1                |            |
| 13 | 1.99E+08 | G       | A     | 2023.59 | 156 | 1/1 | 1/1 | 1/1 | 0/1 | 0/1 | 1/1 | 0/0 | intergenic  | MODIFIER NONE |                      | -1                 | ENSSSCG00000012021-ssc-mir-155      | -1                         |            |
| 13 | 1.99E+08 | G       | A     | 1685.62 | 144 | 1/1 | 1/1 | 1/1 | 0/1 | 0/1 | 1/1 | 0/0 | intergenic  | MODIFIER NONE |                      | -1                 | ENSSSCG00000012021-ssc-mir-155      | -1                         |            |
| 13 | 1.99E+08 | T       | C     | 1771.66 | 151 | 1/1 | 1/1 | 1/1 | 0/1 | 1/1 | 1/1 | 0/0 | intergenic  | MODIFIER NONE |                      | -1                 | ssc-mir-155-JAM2                    | -1                         |            |
| 13 | 2.05E+08 | G       | C     | 1377.22 | 130 | 1/1 | 1/1 | 1/1 | 1/1 | 1/1 | 1/1 | 0/0 | intron_vari | MODIFIER NONE | c.1481-525C>G        | -1                 | TIAM1 protein_coding                | ENSSSCT0 10                |            |
| 13 | 2.05E+08 | C       | G     | 1075.28 | 120 | 1/1 | 1/1 | 1/1 | 1/1 | 1/1 | 1/1 | 0/0 | intron_vari | MODIFIER NONE | c.1481-557G>C        | -1                 | TIAM1 protein_coding                | ENSSSCT0 10                |            |
| 13 | 2.06E+08 | T       | C     | 3723.55 | 176 | 1/1 | 1/1 | 1/1 | 1/1 | 1/1 | 1/1 | 0/0 | intergenic  | MODIFIER NONE |                      | -1                 | SCAF4-U6                            | -1                         |            |
| 13 | 2.06E+08 | GC      | G     | 6886.68 | 184 | 1/1 | 1/1 | 1/1 | 1/1 | 1/1 | 1/1 | 0/0 | intergenic  | MODIFIER NONE |                      | -1                 | U6-HUNK                             | -1                         |            |
| 13 | 2.06E+08 | T       | C     | 5664.55 | 218 | 1/1 | 1/1 | 1/1 | 1/1 | 1/1 | 1/1 | 0/0 | intergenic  | MODIFIER NONE |                      | -1                 | U6-HUNK                             | -1                         |            |
| 13 | 2.06E+08 | TGCTGTG | T     | 7940.72 | 108 | 1/1 | 1/1 | 1/1 | 1/1 | 1/1 | 1/1 | 0/0 | intergenic  | MODIFIER NONE | n.null_nulldelGCTGTG | -1                 | U6-HUNK                             | -1                         |            |
| 13 | 2.06E+08 | A       | G     | 6807.55 | 306 | 1/1 | 1/1 | 1/1 | 1/1 | 1/1 | 1/1 | 0/0 | intergenic  | MODIFIER NONE |                      | -1                 | HUNK-BRSK2                          | -1                         |            |
| 13 | 2.06E+08 | A       | AAAC  | 8022.04 | 175 | 1/1 | 1/1 | 1/1 | 1/1 | 1/1 | 1/1 | 0/0 | intergenic  | MODIFIER NONE | n.null_nullinsAAAC   | -1                 | BRSK2-EVA1C                         | -1                         |            |
| 13 | 2.09E+08 | A       | C     | 1572.35 | 192 | 1/1 | 1/1 | 1/1 | 1/1 | 0/1 | 0/1 | 0/0 | intergenic  | MODIFIER NONE |                      | -1                 | RUNX1-ENSSSCG00000027172            | -1                         |            |
| 14 | 11250816 | G       | T     | 1477.15 | 177 | 0/0 | 1/1 | 1/1 | 0/1 | 0/1 | 1/1 | 1/1 | 1/1         | intergenic    | MODIFIER NONE        |                    | -1                                  | ENSSSCG00000009655-PPP2R2A | -1         |
| 14 | 1.5E+08  | G       | A     | 1674.14 | 215 | 0/0 | 0/1 | 0/1 | 0/1 | 0/1 | 0/1 | 1/1 | 1/1         | intergenic    | MODIFIER NONE        |                    | -1                                  | 5S_rRNA-MGMT               | -1         |
| 14 | 9364596  | C       | G     | 1136.8  | 151 | 1/1 | 1/1 | 1/1 | 1/1 | 1/1 | 1/1 | 0/0 | intergenic  | MODIFIER NONE |                      | -1                 | STC1-ADAM28                         | -1                         |            |
| 14 | 11231630 | C       | T     | 1082.61 | 131 | 1/1 | 1/1 | 1/1 | 1/1 | 1/1 | 1/1 | 0/0 | intergenic  | MODIFIER NONE |                      | -1                 | ENSSSCG00000009655-PPP2R2A          | -1                         |            |
| 14 | 12236242 | A       | AG    | 1187.77 | 220 | 1/1 | 0/1 | 0/1 | 0/1 | 0/1 | 1/1 | 0/0 | upstream    | MODIFIER NONE | c.-524_-524insC      | -1                 | TRIM35 protein_coding               | ENSSSCT0 -1                |            |
| 14 | 12236242 | A       | AG    | 1187.77 | 220 | 1/1 | 0/1 | 0/1 | 0/1 | 0/1 | 1/1 | 0/0 | intergenic  | MODIFIER NONE | n.null_nullinsG      | -1                 | TRIM35-PTK2B                        | -1                         |            |
| 14 | 13681570 | TG      | T     | 7991    | 231 | 1/1 | 1/1 | 1/1 | 1/1 | 1/1 | 1/1 | 0/0 | intron_vari | MODIFIER NONE | c.1406+1198delG      | -1                 | EXTL3 protein_coding                | ENSSSCT0 5                 |            |
| 14 | 17852170 | T       | C     | 1425.06 | 158 | 1/1 | 1/1 | 1/1 | 1/1 | 1/1 | 1/1 | 0/0 | intergenic  | MODIFIER NONE |                      | -1                 | HAND2-ENSSSCG00000009704            | -1                         |            |
| 14 | 20424379 | G       | GT    | 4796.6  | 234 | 1/1 | 1/1 | 1/1 | 1/1 | 1/1 | 0/1 | 0/0 | intergenic  | MODIFIER NONE | n.null_nullinsT      | -1                 | ENSSSCG00000024906-AADAT            | -1                         |            |
| 14 | 21859350 | T       | TA    | 3424.31 | 204 | 1/1 | 1/1 | 1/1 | 1/1 | 1/1 | 0/1 | 0/0 | intergenic  | MODIFIER NONE | n.null_nullinsA      | -1                 | SH3RF1-CBR4                         | -1                         |            |
| 14 | 24064797 | G       | A     | 6548.6  | 225 | 1/1 | 1/1 | 1/1 | 1/1 | 1/1 | 1/1 | 0/0 | intron_vari | MODIFIER NONE | c.352+384G>A         | -1                 | CHFR protein_coding                 | ENSSSCT0 3                 |            |
| 14 | 40188921 | C       | T     | 1557.9  | 156 | 1/1 | 1/1 | 1/1 | 1/1 | 1/1 | 0/1 | 0/0 | intergenic  | MODIFIER NONE |                      | -1                 | ENSSSCG00000009866-TBX5             | -1                         |            |
| 14 | 40383540 | C       | T     | 2063.62 | 156 | 1/1 | 1/1 | 1/1 | 1/1 | 1/1 | 0/1 | 0/0 | intergenic  | MODIFIER NONE |                      | -1                 | TBX5-U6                             | -1                         |            |
| 14 | 40414279 | C       | T     | 2176.34 | 148 | 1/1 | 1/1 | 1/1 | 1/1 | 1/1 | 0/1 | 0/0 | upstream    | MODIFIER NONE | n.-1C>T              | -1                 | U6 snRNA                            | ENSSSCT0 -1                |            |
| 14 | 40414279 | C       | T     | 2176.34 | 148 | 1/1 | 1/1 | 1/1 | 1/1 | 1/1 | 0/1 | 0/0 | intergenic  | MODIFIER NONE |                      | -1                 | TBX5-U6                             | -1                         |            |
| 14 | 71628311 | C       | CTT   | 2366.72 | 235 | 1/1 | 1/1 | 0/1 | 0/1 | 0/1 | 1/1 | 0/0 | intergenic  | MODIFIER NONE | n.null_nullinsTT     | -1                 | EGR2-NRBF2                          | -1                         |            |
| 14 | 72046301 | C       | CACAT | 6619.88 | 265 | 1/1 | 1/1 | 1/1 | 0/1 | 0/1 | 0/1 | 0/0 | intergenic  | MODIFIER NONE | n.null_nullinsACAT   | -1                 | JMJD1C-ssc-mir-1296                 | -1                         |            |
| 14 | 72609770 | A       | AT    | 1430.63 | 261 | 1/1 | 1/1 | 1/1 | 0/0 | 0/0 | 1/1 | 0/0 | intergenic  | MODIFIER NONE | n.null_nullinsT      | -1                 | ENSSSCG00000028393-CTNNA3           | -1                         |            |
| 14 | 73661476 | CA      | C     | 4225.41 | 256 | 1/1 | 1/1 | 1/1 | 0/1 | 0/1 | 1/1 | 0/0 | intergenic  | MODIFIER NONE |                      | -1                 | ENSSSCG00000028393-CTNNA3           | -1                         |            |
| 14 | 74093522 | T       | C     | 1218.21 | 170 | 1/1 | 1/1 | 1/1 | 0/1 | 0/1 | 1/1 | 0/0 | intergenic  | MODIFIER NONE |                      | -1                 | ENSSSCG00000028393-CTNNA3           | -1                         |            |
| 14 | 74598813 | C       | T     | 1653.67 | 160 | 1/1 | 1/1 | 1/1 | 0/1 | 0/1 | 1/1 | 0/0 | intergenic  | MODIFIER NONE |                      | -1                 | ENSSSCG00000028393-CTNNA3           | -1                         |            |
| 14 | 99445928 | T       | A     | 1441.96 | 169 | 1/1 | 1/1 | 1/1 | 1/1 | 1/1 | 1/1 | 0/0 | intergenic  | MODIFIER NONE |                      | -1                 | ENSSSCG00000029530-ENSSSCG000000023 | -1                         |            |
| 14 | 1.16E+08 | T       | G     | 1465.43 | 175 | 1/1 | 1/1 | 1/1 | 1/1 | 1/1 | 0/1 | 0/0 | intron_vari | MODIFIER NONE | c.688+1823A>C        | -1                 | ENSSSCG protein_coding              | ENSSSCT0 9                 |            |
| 14 | 1.2E+08  | C       | CT    | 3373.8  | 249 | 1/1 | 1/1 | 1/1 | 1/1 | 1/1 | 1/1 | 0/0 | intron_vari | MODIFIER NONE | c.1533+403_1533+4C   | -1                 | ABCC2 protein_coding                | ENSSSCT0 11                |            |
| 14 | 1.27E+08 | A       | G     | 1030.11 | 129 | 1/1 | 1/1 | 1/1 | 1/1 | 1/1 | 0/1 | 0/0 | intergenic  | MODIFIER NONE |                      | -1                 | U8-U6                               | -1                         |            |
| 14 | 1.3E+08  | G       | GAAAC | 1385    | 226 | 1/1 | 1/1 | 1/1 | 1/1 | 1/1 | 1/1 | 0/0 | intergenic  | MODIFIER NONE | n.null_nullinsAAAC   | -1                 | SNORA62-XPNPPE1                     | -1                         |            |
| 14 | 1.34E+08 | G       | A     | 1407.89 | 165 | 1/1 | 1/1 | 1/1 | 1/1 | 1/1 | 0/1 | 0/0 | intron_vari | MODIFIER NONE | c.797-63C>T          | -1                 | ENSSSCG protein_coding              | ENSSSCT0 9                 |            |

|    |          |      |      |         |     |     |     |     |     |     |     |     |             |               |                     |    |                                      |             |
|----|----------|------|------|---------|-----|-----|-----|-----|-----|-----|-----|-----|-------------|---------------|---------------------|----|--------------------------------------|-------------|
| 14 | 1.34E+08 | G    | A    | 1033.17 | 157 | 1/1 | 1/1 | 1/1 | 1/1 | 1/1 | 0/1 | 0/0 | intron_vari | MODIFIER NONE | c.797-90C>T         | -1 | ENSSSCG protein_coding               | ENSSSCT0 9  |
| 15 | 19740207 | C    | A    | 1451.84 | 147 | 0/0 | 0/1 | 0/1 | 1/1 | 1/1 | 1/1 | 1/1 | intergenic  | MODIFIER NONE |                     | -1 | ENSSSCG00000029118-ENSSSCG000000015  | -1          |
| 15 | 24436358 | T    | C    | 1285.4  | 173 | 0/0 | 0/1 | 0/1 | 1/1 | 1/1 | 1/1 | 1/1 | intergenic  | MODIFIER NONE |                     | -1 | U6-ENSSSCG000000026504               | -1          |
| 15 | 38157850 | T    | TA   | 1519.66 | 225 | 0/0 | 0/1 | 0/1 | 1/1 | 1/1 | 1/1 | 1/1 | intergenic  | MODIFIER NONE | n.null_nullinsA     | -1 | ENSSSCG000000015747-ENSSSCG000000029 | -1          |
| 15 | 65506863 | G    | A    | 1070.23 | 133 | 0/0 | 0/1 | 0/1 | 1/1 | 1/1 | 1/1 | 1/1 | intergenic  | MODIFIER NONE |                     | -1 | SNORA19-HS65T1                       | -1          |
| 15 | 65506911 | C    | T    | 1551.78 | 156 | 0/0 | 0/1 | 0/1 | 1/1 | 1/1 | 1/1 | 1/1 | intergenic  | MODIFIER NONE |                     | -1 | SNORA19-HS65T1                       | -1          |
| 15 | 1.09E+08 | A    | C    | 1425.75 | 160 | 0/0 | 0/1 | 0/1 | 1/1 | 1/1 | 1/1 | 1/1 | intergenic  | MODIFIER NONE |                     | -1 | TMEFF2-STK17B                        | -1          |
| 15 | 1.36E+08 | G    | T    | 1526.59 | 126 | 0/0 | 0/1 | 0/1 | 1/1 | 1/1 | 1/1 | 1/1 | intergenic  | MODIFIER NONE |                     | -1 | U6-SNORA31                           | -1          |
| 15 | 1.41E+08 | C    | CA   | 1924.64 | 229 | 0/0 | 0/1 | 0/1 | 0/1 | 0/1 | 1/1 | 1/1 | intergenic  | MODIFIER NONE | n.null_nullinsA     | -1 | U6-ENSSSCG000000030288               | -1          |
| 15 | 1.51E+08 | AC   | A    | 2015.52 | 203 | 0/0 | 0/0 | 0/0 | 0/1 | 0/1 | 0/1 | 1/1 | intergenic  | MODIFIER NONE |                     | -1 | COPS8-COL6A3                         | -1          |
| 15 | 19382449 | T    | C    | 1183.19 | 148 | 1/1 | 1/1 | 1/1 | 1/1 | 1/1 | 1/1 | 0/0 | upstream    | MODIFIER NONE | c.-1T>C             | -1 | MAP3K19 protein_coding               | ENSSSCT0 -1 |
| 15 | 19382449 | T    | C    | 1183.19 | 148 | 1/1 | 1/1 | 1/1 | 1/1 | 1/1 | 1/1 | 0/0 | intergenic  | MODIFIER NONE |                     | -1 | RAB3GAP1-MAP3K19                     | -1          |
| 15 | 19761538 | T    | G    | 1835.16 | 162 | 1/1 | 1/1 | 1/1 | 1/1 | 1/1 | 1/1 | 0/0 | intergenic  | MODIFIER NONE |                     | -1 | ENSSSCG00000029118-ENSSSCG000000015  | -1          |
| 15 | 37952226 | A    | AAAT | 2149.4  | 231 | 1/1 | 1/1 | 1/1 | 1/1 | 1/1 | 1/1 | 0/1 | intron_vari | MODIFIER NONE | c.1139-1263_1139-12 | -1 | ENSSSCG protein_coding               | ENSSSCT0 10 |
| 15 | 1.43E+08 | A    | G    | 1239.38 | 110 | 1/1 | 1/1 | 1/1 | 1/1 | 0/1 | 0/1 | 0/0 | intergenic  | MODIFIER NONE |                     | -1 | U6-DNER                              | -1          |
| 15 | 1.5E+08  | A    | C    | 1754.64 | 176 | 1/1 | 1/1 | 1/1 | 1/1 | 1/1 | 1/1 | 0/1 | intergenic  | MODIFIER NONE |                     | -1 | ENSSSCG000000024859-ENSSSCG000000016 | -1          |
| 15 | 1.52E+08 | TA   | T    | 1704.25 | 190 | 1/1 | 1/1 | 1/1 | 0/1 | 0/1 | 0/0 | 0/0 | upstream    | MODIFIER NONE | c.-1delA            | -1 | ENSSSCG protein_coding               | ENSSSCT0 -1 |
| 15 | 1.52E+08 | TA   | T    | 1704.25 | 190 | 1/1 | 1/1 | 1/1 | 0/1 | 0/1 | 0/0 | 0/0 | intergenic  | MODIFIER NONE |                     | -1 | KLHL30-ENSSSCG00000016337            | -1          |
| 15 | 1.52E+08 | A    | G    | 1069.65 | 142 | 1/1 | 1/1 | 1/1 | 1/1 | 0/1 | 0/1 | 0/1 | intergenic  | MODIFIER NONE |                     | -1 | ENSSSCG00000016338-ENSSSCG000000018  | -1          |
| 16 | 59844155 | G    | C    | 1032.56 | 119 | 0/0 | 0/1 | 0/0 | 1/1 | 0/1 | 0/1 | 1/1 | intergenic  | MODIFIER NONE |                     | -1 | SLIT3-ENSSSCG000000026810            | -1          |
| 16 | 2989313  | A    | G    | 2092.88 | 100 | 1/1 | 1/1 | 1/1 | 0/1 | 0/1 | 1/1 | 0/0 | intergenic  | MODIFIER NONE |                     | -1 | U6-ENSSSCG000000029792               | -1          |
| 16 | 13581850 | CT   | C    | 4961.18 | 235 | 1/1 | 1/1 | 1/1 | 1/1 | 1/1 | 1/1 | 0/0 | intergenic  | MODIFIER NONE |                     | -1 | ENSSSCG000000029525-CDH9             | -1          |
| 16 | 15552122 | G    | GT   | 5370.87 | 254 | 1/1 | 1/1 | 1/1 | 1/1 | 1/1 | 1/1 | 0/0 | intergenic  | MODIFIER NONE | n.null_nullinsT     | -1 | ENSSSCG000000018139-U6               | -1          |
| 16 | 23627177 | G    | A    | 1113.76 | 128 | 1/1 | 1/1 | 1/1 | 1/1 | 1/1 | 0/0 | 0/0 | intergenic  | MODIFIER NONE |                     | -1 | C5orf42-NUP155                       | -1          |
| 16 | 76876718 | T    | C    | 1501.23 | 146 | 1/1 | 1/1 | 1/1 | 0/1 | 0/1 | 0/1 | 0/0 | intergenic  | MODIFIER NONE |                     | -1 | NMUR2-ENSSSCG000000017077            | -1          |
| 17 | 36984058 | C    | CT   | 1772.88 | 238 | 0/0 | 0/0 | 0/0 | 0/1 | 1/1 | 1/1 | 1/1 | intergenic  | MODIFIER NONE | n.null_nullinsT     | -1 | OXT-MRPS26                           | -1          |
| 17 | 40342407 | C    | T    | 1218.62 | 126 | 0/0 | 0/1 | 0/1 | 1/1 | 1/1 | 1/1 | 1/1 | upstream    | MODIFIER NONE | c.-1C>T             | -1 | ENSSSCG protein_coding               | ENSSSCT0 -1 |
| 17 | 40342407 | C    | T    | 1218.62 | 126 | 0/0 | 0/1 | 0/1 | 1/1 | 1/1 | 1/1 | 1/1 | intron_vari | MODIFIER NONE | c.-172+1139C>T      | -1 | DUSP15 protein_coding                | ENSSSCT0 3  |
| 17 | 40342423 | A    | T    | 1394.48 | 134 | 0/0 | 0/1 | 0/1 | 1/1 | 1/1 | 1/1 | 1/1 | upstream    | MODIFIER NONE | c.-1A>T             | -1 | ENSSSCG protein_coding               | ENSSSCT0 -1 |
| 17 | 40342423 | A    | T    | 1394.48 | 134 | 0/0 | 0/1 | 0/1 | 1/1 | 1/1 | 1/1 | 1/1 | intron_vari | MODIFIER NONE | c.-172+1155A>T      | -1 | DUSP15 protein_coding                | ENSSSCT0 3  |
| 17 | 40342441 | T    | G    | 1631.21 | 147 | 0/0 | 0/1 | 0/1 | 1/1 | 1/1 | 1/1 | 1/1 | upstream    | MODIFIER NONE | c.-1T>G             | -1 | ENSSSCG protein_coding               | ENSSSCT0 -1 |
| 17 | 40342441 | T    | G    | 1631.21 | 147 | 0/0 | 0/1 | 0/1 | 1/1 | 1/1 | 1/1 | 1/1 | intron_vari | MODIFIER NONE | c.-172+1173T>G      | -1 | DUSP15 protein_coding                | ENSSSCT0 3  |
| 17 | 43895202 | T    | A    | 1201.82 | 145 | 0/0 | 0/1 | 1/1 | 1/1 | 1/1 | 1/1 | 1/1 | intron_vari | MODIFIER NONE | c.24+870A>T         | -1 | ENSSSCG protein_coding               | ENSSSCT0 1  |
| 17 | 265816   | G    | A    | 1388.63 | 126 | 1/1 | 1/1 | 1/1 | 1/1 | 1/1 | 1/1 | 0/0 | intergenic  | MODIFIER NONE |                     | -1 | ENSSSCG000000024717-RPS19            | -1          |
| 17 | 283821   | C    | T    | 1053.28 | 142 | 1/1 | 1/1 | 1/1 | 0/1 | 0/1 | 1/1 | 0/0 | intergenic  | MODIFIER NONE |                     | -1 | ENSSSCG000000024717-RPS19            | -1          |
| 17 | 46362451 | G    | A    | 6937.55 | 295 | 1/1 | 1/1 | 1/1 | 1/1 | 1/1 | 1/1 | 0/0 | intron_vari | MODIFIER NONE | c.121+26649G>A      | -1 | ENSSSCG protein_coding               | ENSSSCT0 1  |
| 17 | 46362451 | G    | A    | 6937.55 | 295 | 1/1 | 1/1 | 1/1 | 1/1 | 1/1 | 1/1 | 0/0 | intron_vari | MODIFIER NONE | c.360-5065C>T       | -1 | ENSSSCG protein_coding               | ENSSSCT0 5  |
| 17 | 51225602 | C    | T    | 1283.86 | 145 | 1/1 | 1/1 | 1/1 | 1/1 | 1/1 | 1/1 | 0/0 | intergenic  | MODIFIER NONE |                     | -1 | U6-SRSF6                             | -1          |
| 17 | 52157271 | C    | T    | 1387.06 | 119 | 1/1 | 1/1 | 1/1 | 1/1 | 1/1 | 1/1 | 0/0 | upstream    | MODIFIER NONE | c.-1C>T             | -1 | GDAP1L1 protein_coding               | ENSSSCT0 -1 |
| 17 | 52157271 | C    | T    | 1387.06 | 119 | 1/1 | 1/1 | 1/1 | 1/1 | 1/1 | 1/1 | 0/0 | intergenic  | MODIFIER NONE |                     | -1 | ENSSSCG000000025757-GDAP1L1          | -1          |
| 17 | 52157272 | A    | G    | 1304.06 | 117 | 1/1 | 1/1 | 1/1 | 1/1 | 1/1 | 1/1 | 0/0 | upstream    | MODIFIER NONE | c.-1A>G             | -1 | GDAP1L1 protein_coding               | ENSSSCT0 -1 |
| 17 | 52157272 | A    | G    | 1304.06 | 117 | 1/1 | 1/1 | 1/1 | 1/1 | 1/1 | 1/1 | 0/0 | intergenic  | MODIFIER NONE |                     | -1 | ENSSSCG000000025757-GDAP1L1          | -1          |
| 17 | 53285059 | C    | A    | 1058.83 | 141 | 1/1 | 1/1 | 1/1 | 1/1 | 1/1 | 1/1 | 0/0 | upstream    | MODIFIER NONE | c.-292G>T           | -1 | ENSSSCG protein_coding               | ENSSSCT0 -1 |
| 17 | 53285059 | C    | A    | 1058.83 | 141 | 1/1 | 1/1 | 1/1 | 1/1 | 1/1 | 1/1 | 0/0 | intron_vari | MODIFIER NONE | c.255-6922G>T       | -1 | ENSSSCG protein_coding               | ENSSSCT0 3  |
| 17 | 53560143 | C    | A    | 1164.32 | 104 | 1/1 | 1/1 | 1/1 | 1/1 | 1/1 | 1/1 | 0/0 | intergenic  | MODIFIER NONE |                     | -1 | ENSSSCG000000024548-SPINT4           | -1          |
| 17 | 64717988 | A    | AT   | 1614.27 | 239 | 1/1 | 1/1 | 1/1 | 1/1 | 1/1 | 0/1 | 0/0 | intergenic  | MODIFIER NONE | n.null_nullinsT     | -1 | U6-BMP7                              | -1          |
| 17 | 67813563 | C    | T    | 1257.37 | 138 | 1/1 | 1/1 | 1/1 | 1/1 | 1/1 | 1/1 | 0/0 | intergenic  | MODIFIER NONE |                     | -1 | ENSSSCG000000020676-ENSSSCG000000026 | -1          |
| 17 | 68303209 | A    | G    | 1365.64 | 137 | 1/1 | 1/1 | 1/1 | 1/1 | 1/1 | 0/1 | 0/0 | intergenic  | MODIFIER NONE |                     | -1 | ENSSSCG000000026743-ENSSSCG000000007 | -1          |
| 18 | 46377954 | A    | G    | 1019.53 | 97  | 0/0 | 0/1 | 0/1 | 1/1 | 1/1 | 1/1 | 1/1 | intergenic  | MODIFIER NONE |                     | -1 | PAC1-GHRHR                           | -1          |
| 18 | 55245294 | T    | C    | 1405.56 | 122 | 0/0 | 0/1 | 1/1 | 0/0 | 0/1 | 1/1 | 1/1 | intron_vari | MODIFIER NONE | c.273+8194A>G       | -1 | CCM2 protein_coding                  | ENSSSCT0 3  |
| 18 | 23831    | A    | C    | 1083.47 | 125 | 1/1 | 1/1 | 1/1 | 1/1 | 1/1 | 1/1 | 0/0 | intron_vari | MODIFIER NONE | c.1634-1153A>C      | -1 | SARM1 protein_coding                 | ENSSSCT0 6  |
| 18 | 4708539  | T    | A    | 1445.3  | 126 | 1/1 | 1/1 | 1/1 | 1/1 | 1/1 | 1/1 | 0/0 | intergenic  | MODIFIER NONE |                     | -1 | ENSSSCG000000016424-XRCC2            | -1          |
| 18 | 4975630  | A    | G    | 1546.02 | 132 | 1/1 | 1/1 | 1/1 | 0/1 | 0/1 | 1/1 | 0/0 | intron_vari | MODIFIER NONE | c.39+38218A>G       | -1 | XRCC2 protein_coding                 | ENSSSCT0 1  |
| 18 | 4975630  | A    | G    | 1546.02 | 132 | 1/1 | 1/1 | 1/1 | 0/1 | 0/1 | 1/1 | 0/0 | intron_vari | MODIFIER NONE | c.304-3153A>G       | -1 | ENSSSCG protein_coding               | ENSSSCT0 3  |
| 18 | 9872906  | C    | T    | 4686.15 | 265 | 1/1 | 1/1 | 1/1 | 0/1 | 0/1 | 1/1 | 0/0 | intergenic  | MODIFIER NONE |                     | -1 | MKRN1-RAB19                          | -1          |
| 18 | 12561470 | C    | CA   | 2329.42 | 204 | 1/1 | 1/1 | 1/1 | 1/1 | 1/1 | 0/1 | 0/0 | intergenic  | MODIFIER NONE | n.null_nullinsA     | -1 | ENSSSCG000000022517-ENSSSCG000000025 | -1          |
| 18 | 14272478 | C    | T    | 4476.21 | 201 | 1/1 | 1/1 | 1/1 | 0/1 | 0/1 | 1/1 | 0/0 | intergenic  | MODIFIER NONE |                     | -1 | ssc-mir-490-2-FAM180A                | -1          |
| 18 | 14272507 | A    | G    | 4961.18 | 217 | 1/1 | 1/1 | 1/1 | 0/1 | 0/1 | 1/1 | 0/0 | intergenic  | MODIFIER NONE |                     | -1 | ssc-mir-490-2-FAM180A                | -1          |
| 18 | 14290635 | C    | T    | 3422.16 | 227 | 1/1 | 1/1 | 1/1 | 0/1 | 0/1 | 1/1 | 0/0 | intergenic  | MODIFIER NONE |                     | -1 | ssc-mir-490-2-FAM180A                | -1          |
| 18 | 22392605 | G    | A    | 1838.99 | 121 | 1/1 | 1/1 | 1/1 | 1/1 | 1/1 | 1/1 | 0/0 | intergenic  | MODIFIER NONE |                     | -1 | ENSSSCG000000022443-ENSSSCG000000025 | -1          |
| 18 | 37847421 | G    | GT   | 4164.56 | 224 | 1/1 | 1/1 | 1/1 | 1/1 | 1/1 | 0/1 | 0/0 | intergenic  | MODIFIER NONE | n.null_nullinsT     | -1 | LRRN3-ENSSSCG000000026444            | -1          |
| 18 | 42752356 | GTA  | G    | 5235.66 | 268 | 1/1 | 1/1 | 1/1 | 1/1 | 1/1 | 0/1 | 0/0 | intergenic  | MODIFIER NONE | n.null_nulldelTA    | -1 | DPY19L1-NPSR1                        | -1          |
| 18 | 46136656 | T    | TA   | 3959.55 | 221 | 1/1 | 1/1 | 1/1 | 1/1 | 1/1 | 1/1 | 0/0 | intergenic  | MODIFIER NONE | n.null_nullinsA     | -1 | PPP1R17-PAC1                         | -1          |
| 18 | 49533032 | G    | A    | 1031.01 | 159 | 1/1 | 1/1 | 1/1 | 1/1 | 1/1 | 1/1 | 0/0 | upstream    | MODIFIER NONE | n.-1C>T             | -1 | U6 snRNA                             | ENSSSCT0 -1 |
| 18 | 49533032 | G    | A    | 1031.01 | 159 | 1/1 | 1/1 | 1/1 | 1/1 | 1/1 | 1/1 | 0/0 | intergenic  | MODIFIER NONE |                     | -1 | U6-ENSSSCG000000016695               | -1          |
| 18 | 51188236 | T    | C    | 1015.59 | 130 | 1/1 | .   | 1/1 | 1/1 | 1/1 | 1/1 | 0/0 | intergenic  | MODIFIER NONE |                     | -1 | NFE2L3-ssc-mir-148a                  | -1          |
| 18 | 53721711 | CTTT | C    | 3183.71 | 206 | 1/1 | 1/1 | 1/1 | 0/1 | 1/1 | 0/1 | 0/0 | intron_vari | MODIFIER NONE | c.-115+5088_-115+51 | -1 | TNS3 protein_coding                  | ENSSSCT0 3  |

|    |          |     |    |         |     |     |     |     |     |     |     |     |                           |                    |    |                            |             |
|----|----------|-----|----|---------|-----|-----|-----|-----|-----|-----|-----|-----|---------------------------|--------------------|----|----------------------------|-------------|
| 18 | 55489108 | G   | A  | 5875.09 | 244 | 1/1 | 1/1 | 1/1 | 1/1 | 1/1 | 0/1 | 0/0 | intron_vari MODIFIER NONE | c.1712-19853G>A    | -1 | ENSSSCG protein_coding     | ENSSSCT0 11 |
| 18 | 55489108 | G   | A  | 5875.09 | 244 | 1/1 | 1/1 | 1/1 | 1/1 | 1/1 | 0/1 | 0/0 | intron_vari MODIFIER NONE | c.-418-2427C>T     | -1 | ENSSSCG protein_coding     | ENSSSCT0 1  |
| 18 | 55798214 | C   | G  | 6902.53 | 269 | 1/1 | 1/1 | 1/1 | 1/1 | 1/1 | 0/1 | 0/0 | intergenic, MODIFIER NONE |                    | -1 | NUDCD3-ENSSSCG00000028116  | -1          |
| 18 | 56331394 | CT  | C  | 4487.71 | 214 | 1/1 | 1/1 | 1/1 | 1/1 | 1/1 | 1/1 | 0/0 | intergenic, MODIFIER NONE |                    | -1 | 5S_rRNA-HECW1              | -1          |
| 18 | 57284292 | C   | T  | 6788.53 | 337 | 1/1 | 1/1 | 1/1 | 1/1 | 1/1 | 0/1 | 0/0 | intergenic, MODIFIER NONE |                    | -1 | C7orf25-ENSSSCG00000016762 | -1          |
| 18 | 58205306 | CTT | C  | 3833.6  | 155 | 1/1 | 1/1 | 1/1 | 1/1 | 1/1 | 0/1 | 0/0 | intergenic, MODIFIER NONE | n.null_nulldelTT   | -1 | INHBA-ENSSSCG00000016765   | -1          |
| 18 | 58858477 | A   | G  | 1087.65 | 138 | 1/1 | 1/1 | 1/1 | 1/1 | 1/1 | 1/1 | 0/0 | intergenic, MODIFIER NONE |                    | -1 | ENSSSCG00000016766-SUGCT   | -1          |
| 18 | 58858485 | C   | T  | 1176.08 | 140 | 1/1 | 1/1 | 1/1 | 1/1 | 1/1 | 1/1 | 0/0 | intergenic, MODIFIER NONE |                    | -1 | ENSSSCG00000016766-SUGCT   | -1          |
| 18 | 59078489 | C   | G  | 6684.53 | 307 | 1/1 | 1/1 | 1/1 | 1/1 | 1/1 | 0/1 | 0/0 | intergenic, MODIFIER NONE |                    | -1 | ENSSSCG00000016766-SUGCT   | -1          |
| 18 | 59720279 | T   | C  | 4829.54 | 255 | 1/1 | 1/1 | 1/1 | 1/1 | 1/1 | 0/1 | 0/0 | intergenic, MODIFIER NONE |                    | -1 | CDK13-U6                   | -1          |
| X  | 6727207  | TGC | T  | 3333.81 | 261 | 0/0 | 0/0 | 0/0 | 0/1 | 0/1 | 1/1 | 1/1 | intron_vari MODIFIER NONE | c.317+3568_317+356 | -1 | SHROOM2 protein_coding     | ENSSSCT0 2  |
| X  | 7195511  | T   | G  | 2281.44 | 201 | 0/0 | 0/0 | 0/0 | 0/1 | 0/1 | 1/1 | 1/1 | intron_vari MODIFIER NONE | n.634+28971T>G     | -1 | WWC3 processed_transcript  | ENSSSCT0 1  |
| X  | 16072712 | G   | A  | 2807.39 | 231 | 0/0 | 0/0 | 0/0 | 0/1 | 0/1 | 1/1 | 1/1 | intron_vari MODIFIER NONE | c.-166+29841G>A    | -1 | CDKL5 protein_coding       | ENSSSCT0 1  |
| X  | 16832884 | G   | T  | 2050.16 | 215 | 0/0 | 0/0 | 0/0 | 0/1 | 0/1 | 0/0 | 1/1 | intergenic, MODIFIER NONE |                    | -1 | GPR64-CH242-78D20.1        | -1          |
| X  | 1.26E+08 | A   | G  | 3689.76 | 221 | 0/0 | 0/1 | 0/0 | 0/1 | 0/1 | 1/1 | 1/1 | intron_vari MODIFIER NONE | c.1163+5756T>C     | -1 | GPC3 protein_coding        | ENSSSCT0 4  |
| X  | 1.29E+08 | T   | A  | 2958.38 | 334 | 0/0 | 0/0 | 0/0 | 0/1 | 0/1 | 1/1 | 1/1 | intergenic, MODIFIER NONE |                    | -1 | ZIC3-CH242-204G11.1        | -1          |
| X  | 1.29E+08 | T   | C  | 1319.7  | 177 | 0/0 | 0/0 | 0/0 | 0/1 | 0/1 | 1/1 | 1/1 | intergenic, MODIFIER NONE |                    | -1 | ZIC3-CH242-204G11.1        | -1          |
| X  | 1.31E+08 | C   | T  | 2758.79 | 236 | 0/0 | 0/1 | 0/1 | 0/1 | 0/1 | 1/1 | 1/1 | intron_vari MODIFIER NONE | c.435+4062G>A      | -1 | ATP11C protein_coding      | ENSSSCT0 5  |
| X  | 4246456  | G   | A  | 5920.53 | 213 | 1/1 | 1/1 | 1/1 | 1/1 | 1/1 | 0/1 | 0/0 | intron_vari MODIFIER NONE | c.1366+4636G>A     | -1 | STS protein_coding         | ENSSSCT0 10 |
| X  | 39984625 | G   | A  | 2897.52 | 302 | 1/1 | 1/1 | 1/1 | 0/1 | 0/1 | 0/0 | 0/0 | intergenic, MODIFIER NONE |                    | -1 | BCOR-U6                    | -1          |
| X  | 1.11E+08 | A   | C  | 2480.36 | 183 | 1/1 | 1/1 | 1/1 | 0/1 | 0/1 | 0/1 | 0/0 | intergenic, MODIFIER NONE |                    | -1 | U6-CH242-79N16.1           | -1          |
| X  | 1.26E+08 | G   | GT | 3364.37 | 147 | 1/1 | 1/1 | 1/1 | 1/1 | 1/1 | 0/1 | 0/0 | intergenic, MODIFIER NONE | n.null_nullinsT    | -1 | GPC4-GPC3                  | -1          |
