# Supplementary material for: No excessive mutations in transcription activator-like effector nuclease-mediated α-1,3-galactosyltransferase knockout Yucatan miniature pigs
Source: PubMed Central journal article supplement (PMC6946973; doi:10.5713/ajas.19.0480), 2019-08-23
Supplement: ajas-19-0480-suppl7.pdf [file ajas-19-0480-suppl7.pdf]

Supplementary Table 7. Differential expressed genes between TALEN-edited pigs and wild type strain control

| Order | Tran      | TranAcc   | GeneName | Chr      | Start  | End      | Strand   | Type   | Status | Desc         | Num_of_Samples | EXP:C1:PKM | EXP:C1:PKM | EXP:C3:PKM | EXP:WT:PKM | C1/WT    | C3/WT    | Rseq-WGS (TranAcc) | Rseq-WGS (GeneName) |   |
|-------|-----------|-----------|----------|----------|--------|----------|----------|--------|--------|--------------|----------------|------------|------------|------------|------------|----------|----------|--------------------|---------------------|---|
| 12851 | TBIG01285 | ENSSSCG0  | MS4A8B   |          | 2      | 1057287  | 10573067 | -      | CODING | KNOWN        | Uncharacter    | 7          | 993.712    | 2175.65    | 169.184    | 6486.59  | -6.52764 | -2.98145           | -38.3404            | - |
| 25850 | TBIG02585 | XLOC_025f | Brf1     | GL892627 | 61598  | 64554    | -        | CODING | NOVEL  | Transcripti  | 7              | 5844.93    | 5147.78    | 596.764    | 14674.7    | -2.51067 | -2.50669 | -24.5905           | -                   |   |
| 21241 | TBIG02124 | ENSSSCG0  | SLA-5    |          | 7      | 24643495 | 24685566 | +      | CODING | NOVEL        | Uncharacter    | 7          | 2469.65    | 1117.89    | 633.824    | 13588.6  | -5.50224 | -12.1556           | -21.4391            | - |
| 26453 | TBIG02645 | XLOC_026f | ALAD     | GL893446 | 1      | 256      | +        | CODING | NOVEL  | Delta-amir   | 7              | 18092.1    | 11315.1    | 4975.5     | 94831.2    | -5.24158 | -8.38094 | -19.0596           | -                   |   |
| 28902 | TBIG02890 | XLOC_028f | Mark4    | GL896419 | 25788  | 25980    | -        | CODING | NOVEL  | MAP/micr     | 7              | 1224.94    | 2334.19    | 543.951    | 9744.39    | -7.95499 | -4.17463 | -17.9141           | -                   |   |
| 26029 | TBIG02602 | XLOC_026f | Lrrc61   | GL892911 | 272446 | 272602   | -        | CODING | NOVEL  | Leucine-ric  | 7              | 1343.4     | 12552.7    | 3278.29    | 52643.9    | -39.1871 | -4.19383 | -16.0583           | -                   |   |
| 7248  | TBIG00724 | ENSSSCG0  | USMG5    |          | 14     | 50545515 | 50545776 | +      | CODING | KNOWN        | up-regulat     | 7          | 1735.83    | 4383.96    | 940.426    | 13295    | -7.65916 | -3.03265           | -14.1372            | - |
| 28708 | TBIG02870 | XLOC_028f | IL3RA    | GL896347 | 6795   | 7293     | -        | CODING | NOVEL  | Interleukin  | 7              | 343.757    | 535.83     | 148.954    | 1996.01    | -5.80646 | -3.72508 | -13.4002           | -                   |   |
| 3163  | TBIG00316 | XLOC_003f | plxdc2   |          | 10     | 60033512 | 60033722 | -      | CODING | NOVEL        | Plexin dom     | 7          | 466.216    | 413.47     | 89.2053    | 1100.18  | -2.35981 | -2.66085           | -12.3331            | - |
| 26519 | TBIG02651 | XLOC_026f | IL10RB   | GL893534 | 34     | 249      | -        | CODING | NOVEL  | Interleukin  | 7              | 444.221    | 897.454    | 178.531    | 2135.31    | -4.80686 | -2.3793  | -11.9604           | -                   |   |
| 1358  | TBIG00135 | ENSSSCG0  | CSNK1G1  |          | 1      | 1.19E+08 | 1.19E+08 | -      | CODING | KNOWN        | Uncharacter    | 7          | 185.684    | 281274     | 63.8625    | 621.448  | -3.3468  | -22.094            | -9.73103            | - |
| 27071 | TBIG02707 | XLOC_027f | Klc3     | GL894198 | 17666  | 17856    | -        | CODING | NOVEL  | Kinesin lig  | 7              | 1785.26    | 2045.74    | 876.138    | 7911.74    | -4.4317  | -3.86742 | -9.03024           | -                   |   |
| 26368 | TBIG02636 | XLOC_026f | PLEKH1   | GL893315 | 20220  | 20387    | -        | CODING | NOVEL  | Pleckstrin l | 7              | 1024.25    | 807.283    | 452.041    | 4043       | -3.94728 | -5.00816 | -8.94388           | -                   |   |
| 25530 | TBIG02553 | XLOC_025f | Dnm3     |          | 9      | 1.26E+08 | 1.26E+08 | -      | CODING | NOVEL        | Dynamin-2      | 7          | 236.256    | 93.8751    | 183.984    | 1641.89  | -6.94962 | -17.4902           | -8.92409            | - |
| 3726  | TBIG00372 | XLOC_003f | VWA8     |          | 11     | 26081870 | 26082015 | -      | CODING | NOVEL        | von Willeb     | 7          | 9889.72    | 1107.1     | 556.956    | 4939.05  | 2.002353 | -4.6125            | -8.86794            | - |
| 28459 | TBIG02845 | XLOC_028f | YBEY     | GL896243 | 11753  | 13386    | -        | CODING | NOVEL  | Putative ri  | 7              | 11671.8    | 9993.06    | 3216.59    | 28354.6    | -2.42933 | -2.83743 | -8.81511           | -                   |   |
| 3103  | TBIG00310 | XLOC_003f | Rpi7     |          | 10     | 38814256 | 38814448 | -      | CODING | NOVEL        | 60S riboso     | 7          | 36830      | 28929.8    | 10280.7    | 89110.3  | -2.27831 | -2.90047           | -8.1619             | - |
| 28677 | TBIG02867 | XLOC_028f | UBAC1    | GL896332 | 34809  | 35168    | -        | CODING | NOVEL  | Ubiquitin-i  | 7              | 896.056    | 487.796    | 387.436    | 3118.89    | -3.48069 | -6.39384 | -8.05008           | -                   |   |
| 26632 | TBIG02663 | XLOC_026f | ALAD     | GL893668 | 1      | 205      | -        | CODING | NOVEL  | Delta-amir   | 7              | 508.509    | 213.068    | 144.345    | 1032.23    | -2.02991 | -4.8446  | -7.15113           | -                   |   |
| 29618 | TBIG02961 | ENSSSCG0  | Inmt     | JH118806 | 24194  | 29094    | -        | CODING | NEW_AS | Uncharacter  | 7              | 51.2178    | 12.9122    | 19.7954    | 131.443    | -2.56635 | -10.1798 | -6.64008           | -                   |   |
| 28310 | TBIG02831 | XLOC_028f | Aspscr1  | GL896186 | 4539   | 5283     | -        | CODING | NOVEL  | Tether con   | 7              | 111101     | 427287     | 133790     | 887772     | -7.99068 | -2.07669 | -6.63556           | -                   |   |
| 28755 | TBIG02875 | XLOC_028f | SLC2A4RG | GL896364 | 17152  | 17420    | -        | CODING | NOVEL  | SLC2A4 re    | 7              | 529.225    | 1680.01    | 684.833    | 4442.35    | -8.39407 | -2.64424 | -6.48676           | -                   |   |
| 28760 | TBIG02876 | XLOC_028f | RTEL1    | GL896364 | 44051  | 44631    | -        | CODING | NOVEL  | Regulator i  | 7              | 2544.08    | 5045.32    | 2144.24    | 13675.2    | -5.3753  | -2.71047 | -6.37764           | -                   |   |
| 10113 | TBIG01011 | XLOC_010f | NDUF4F2  |          | 16     | 42680451 | 42680654 | -      | CODING | NOVEL        | Mimitin, m     | 7          | 1021.82    | 566.254    | 447.605    | 2677.44  | -2.62027 | -4.72834           | -5.9817             | - |
| 29136 | TBIG02913 | XLOC_029f | MUCM_RA  | GL896545 | 5      | 1258     | -        | CODING | NOVEL  | Ig mu chai   | 7              | 1902.74    | 3482.87    | 2616.84    | 15150.9    | -7.96267 | -4.35012 | -5.78977           | -                   |   |
| 26170 | TBIG02617 | XLOC_026f | FCGR3    | GL893101 | 2      | 233      | -        | CODING | NOVEL  | Low affin    | 7              | 21882.7    | 20977.6    | 10363.2    | 54871.7    | -2.50754 | -2.61573 | -5.29486           | -                   |   |
| 20022 | TBIG02002 | XLOC_020f | SORCS2   |          | 8      | 3950581  | 3957905  | -      | CODING | NOVEL        | VPS10 dor      | 6          | 141.638    | 30.0105    | 109.574    | 565.652  | -3.99365 | -18.8485           | -5.16228            | - |
| 32033 | TBIG00700 | XLOC_007f | Pde9a    |          | 13     | 2.16E+08 | 2.16E+08 | -      | CODING | NOVEL        | High affini    | 7          | 6734.99    | 10161      | 6118.63    | 31554.9  | -4.68522 | -3.10549           | -5.15718            | - |
| 28498 | TBIG02849 | XLOC_028f | ANAPC2   | GL896260 | 5047   | 5903     | -        | CODING | NOVEL  | Anaphase-    | 7              | 5632.6     | 4455.65    | 2653.28    | 13344.2    | -2.3691  | -2.99489 | -5.02932           | -                   |   |
| 28944 | TBIG02894 | ENSSSCG0  | LSM2     | GL896442 | 6429   | 6878     | -        | CODING | KNOWN  | Sus scrofa   | 7              | 2764.95    | 2160.36    | 1509.04    | 7535.84    | -2.72549 | -3.48823 | -4.9938            | -                   |   |
| 2436  | TBIG00243 | XLOC_002f | SHB      |          | 1      | 2.67E+08 | 2.67E+08 | -      | CODING | NOVEL        | SH2 doma       | 7          | 458.985    | 203.963    | 249.52     | 1207.42  | -2.63063 | -5.9198            | -4.83897            | - |
| 7176  | TBIG00717 | ENSSSCG0  | PLBD2    |          | 14     | 40832763 | 40853776 | +      | CODING | NEW_AS       | phospholip     | 7          | 290.154    | 277.52     | 255.526    | 114.423  | 2.535801 | 2.425387           | -4.47794            | - |
| 1163  | TBIG01166 | ENSSSCG0  | Inmt     |          | 18     | 46637157 | 46641921 | +      | CODING | NOVEL        | Indolethyl     | 7          | 86.2352    | 30.2503    | 70.6645    | 315.744  | -3.66143 | -10.4377           | -4.46821            | - |
| 28832 | TBIG02883 | XLOC_028f | Id3      | GL896386 | 13540  | 13725    | -        | CODING | NOVEL  | DNA-bindi    | 7              | 3118.86    | 7254.2     | 12690.4    | 53577.3    | -17.1875 | -7.38569 | -4.22188           | -                   |   |
| 21952 | TBIG02195 | ENSSSCG0  | TMP-CH24 |          | 7      | 24706220 | 24722563 | -      | CODING | NOVEL        | -              | 7          | 44834.2    | 26013.1    | 30648.3    | 126113   | -2.17288 | -4.84806           | -11.1484            | - |
| 25078 | TBIG02507 | ENSSSCG0  | STAP4    |          | 9      | 74981686 | 75048318 | -      | CODING | NEW_AS       | Sus scrofa     | 7          | 534.424    | 630.743    | 55.8317    | 227.229  | 2.351918 | 2.775803           | -4.06989            | - |
| 12695 | TBIG01269 | XLOC_012f | gag-pol  |          | 2      | 742220   | 747473   | -      | CODING | NOVEL        | Gag-Pol pi     | 7          | 28.239     | 18.9851    | 16.1817    | 64.6756  | -2.29029 | -3.40665           | -3.99684            | - |
| 28985 | TBIG02898 | ENSSSCG0  | CDC137   | GL896467 | 17073  | 19084    | +        | CODING | NOVEL  | coiled-coil  | 7              | 45.3546    | 21.9816    | 27.73      | 107.236    | -2.36439 | -4.87844 | -3.86715           | -                   |   |
| 9846  | TBIG00984 | XLOC_009f | Lilrb3   |          | 16     | 86105298 | 86420144 | +      | CODING | NEW_AS       | Leukoocyte     | 7          | 15.815     | 18.5381    | 10.4448    | 38.1865  | -2.41457 | -2.05989           | -3.65603            | - |
| 11666 | TBIG01166 | ENSSSCG0  | Polr2l   |          | 2      | 142435   | 143584   | -      | CODING | KNOWN        | Uncharacter    | 7          | 434.073    | 383.895    | 252.755    | 912.007  | -2.10105 | -2.37567           | -3.60826            | - |
| 28298 | TBIG02829 | XLOC_028f | CXB      | GL896176 | 1      | 516      | -        | CODING | NOVEL  | Creatine ki  | 7              | 8803.22    | 15344.7    | 10522.1    | 37111.1    | -4.21563 | -2.4185  | -3.52697           | -                   |   |
| 26282 | TBIG02628 | XLOC_026f | TMEM50A  | GL893200 | 4      | 247      | -        | CODING | NOVEL  | Transmeml    | 7              | 250.389    | 125.967    | 197.585    | 687.195    | -2.74451 | -5.45536 | -3.47797           | -                   |   |
| 14008 | TBIG01400 | XLOC_014f | skp1     |          | 2      | 1.46E+08 | 1.46E+08 | -      | CODING | NOVEL        | S-phase ki     | 7          | 495282     | 508346     | 388191     | 1309070  | -2.64308 | -2.57136           | -3.37223            | - |
| 28427 | TBIG02842 | XLOC_028f | Notch1   | GL896225 | 29279  | 29470    | -        | CODING | NOVEL  | Neurogeni    | 7              | 341.54     | 4103.8     | 3043.43    | 9855.52    | -2.88561 | -2.40156 | -3.23829           | -                   |   |
| 25707 | TBIG02570 | XLOC_025f | ALAD     | GL892357 | 1      | 153      | -        | CODING | NOVEL  | Delta-amir   | 7              | 4997.38    | 7484.45    | 4885.37    | 15294      | -3.0604  | -2.04344 | -3.13057           | -                   |   |
| 29719 | TBIG02971 | XLOC_029f | DHODH    | JH118898 | 117287 | 117660   | -        | CODING | NOVEL  | Dihydrooro   | 7              | 19.9777    | 39.4171    | 48.8822    | 152.807    | -7.64888 | -3.87667 | -3.12603           | -                   |   |
| 11812 | TBIG01181 | ENSSSCG0  | FTH1     |          | 2      | 8983277  | 8986090  | +      | CODING | KNOWN        | Sus scrofa     | 7          | 2699.56    | 2302.27    | 1858.38    | 5776.74  | -2.13988 | -2.50913           | -3.10848            | - |
| 26017 | TBIG02601 | XLOC_026f | Atp6v0e2 | GL892911 | 249005 | 252536   | +        | CODING | NOVEL  | V-type pro   | 7              | 1802.02    | 912.166    | 1340.96    | 4077.25    | -2.2626  | -4.46986 | -3.04055           | -                   |   |
| 8245  | TBIG00824 | ENSSSCG0  | UROS     |          | 14     | 1.47E+08 | 1.47E+08 | -      | CODING | NEW_AS       | uroporph       | 7          | 92.8593    | 37.3737    | 68.2353    | 203.717  | -2.19382 | -5.45081           | -2.98551            | - |
| 28476 | TBIG02847 | XLOC_028f | OGFR     | GL896248 | 17478  | 17712    | -        | CODING | NOVEL  | Opioid rec   | 7              | 64.4559    | 424.353    | 320.956    | 945.201    | -1.64643 | -2.27379 | -2.94496           | -                   |   |
| 14314 | TBIG01431 | ENSSSCG0  | HBM      |          | 3      | 40948175 | 40948852 | +      | CODING | KNOWN        | hemoglobi      | 7          | 123.249    | 1175.84    | 4474.71    | 13125.1  | -106.493 | -11.1623           | -2.93317            | - |
| 18556 | TBIG01855 | XLOC_018f | TPT1     |          | 5      | 16183353 | 16183667 | -      | CODING | NOVEL        | Translation    | 7          | 4311.82    | 3349.63    | 4702.8     | 13772.9  | -3.19422 | -4.11177           | -2.92866            | - |
| 18253 | TBIG01825 | ENSSSCG0  | Itr2     |          | 5      | 51068458 | 51115752 | -      | CODING | NEW_AS       | Uncharacter    | 7          | 394.53     | 253.902    | 409.283    | 1196.59  | -3.03295 | -4.7128            | -2.92362            | - |
| 14478 | TBIG01447 | ENSSSCG0  | RNF181   |          | 3      | 62044672 | 62046534 | +      | CODING | NEW_AS       | Uncharacter    | 7          | 12.0065    | 14.9899    | 11.8412    | 33.6444  | -2.80218 | -2.24447           | -2.8413             | - |
| 28284 | TBIG02828 | XLOC_028f | NAPRT1   | GL896158 | 3      | 235      | -        | CODING | NOVEL  | Nicotinate   | 7              | 357.39     | 511.042    | 690.025    | 1916.85    | -5.36347 | -3.75087 | -2.77794           | -                   |   |
| 19785 | TBIG01978 | ENSSSCG0  | KARS     |          | 6      | 11913750 | 11914466 | -      | CODING | KNOWN        | Uncharacter    | 7          | 73.3252    | 74.9938    | 77.6953    | 213.652  | -2.91376 | -2.86805           | -2.74987            | - |
| 26332 | TBIG02633 | XLOC_026f | Ube2m    | GL893268 | 2      | 136      | -        | CODING | NOVEL  | NEDB8-co     | 7              | 6588.11    | 41615.5    | 5228.5     | 14337.8    | -2.17631 | 2.902502 | -2.74224           | -                   |   |
| 23878 | TBIG02387 | XLOC_023f | Pol      |          | 6      | 64377465 | 64377626 | -      | CODING | NOVEL        | Retrovirus     | 6          | 3454.52    | 3828.55    | 411.104    | 1080.51  | 3.19712  | 3.54328            | -2.62831            | - |
| 29556 | TBIG02955 | ENSSSCG0  | C18orf8  | JH118750 | 12529  | 14226    | -        | CODING | KNOWN  | Uncharacter  | 7              | 200.381    | 236.421    | 222.718    | 581.38     | -2.90137 | -2.45909 | -2.61039           | -                   |   |
| 21950 | TBIG02195 | ENSSSCG0  | SLA-5    |          | 7      | 24684421 | 24749212 | -      | CODING | NOVEL        | Uncharacter    | 7          | 25.0326    | 22.7202    | 24.6405    | 64.2552  | -2.56686 | -2.82811           | -2.60771            | - |
| 24971 | TBIG02497 | ENSSSCG0  | SORL1    |          | 9      | 53829400 | 53908876 | -      | CODING | NEW_AS       | Uncharacter    | 7          | 128.003    | 94.3783    | 14.1043    | 36.4657  | 3.51023  | 2.588139           | -2.58453            | - |

|       |                              |           |       |          |          |        |        |              |              |         |         |         |         |          |          |          |          |   |   |
|-------|------------------------------|-----------|-------|----------|----------|--------|--------|--------------|--------------|---------|---------|---------|---------|----------|----------|----------|----------|---|---|
| 26863 | TB1G02686 XLOC_0261 SENP3    | GL893964. | 2     | 1393     | +        | CODING | NOVEL  | Sentrin-spr  | 7            | 30.0942 | 28.351  | 30.6696 | 14.167  | 2.124246 | 2.0012   | 2.164862 | -        | - |   |
| 8976  | TB1G00897 ENSSSCG0 NMI       |           | 15    | 3600     | 29467    | -      | CODING | NEW_AS       | N-myc (an    | 7       | 25.4716 | 25.908  | 26.6202 | 12.2474  | 2.079756 | 2.115388 | 2.173539 | - | - |
| 28672 | TB1G02867 XLOC_0281 Kpn4     | GL896327. | 9685  | 13278    | +        | CODING | NOVEL  | Importin s   | 7            | 101.307 | 5223.81 | 4254.56 | 1957.14 | 5.176278 | 2.669104 | 2.173866 | -        | - |   |
| 849   | TB1G00084 ENSSSCG0 PRPF4     |           | 1     | 2.85E+08 | 2.85E+08 | +      | CODING | NEW_AS       | pre-mRNA     | 7       | 53.261  | 41.1012 | 37.7856 | 17.3289  | 3.073536 | 2.37183  | 2.180496 | - | - |
| 26730 | TB1G02673 ENSSSCG0 KDELR2    | GL893800. | 7054  | 17355    | +        | CODING | NEW_AS | KDEL (Lys-   | 7            | 45.8798 | 45.7896 | 42.4378 | 19.3699 | 2.368613 | 2.363956 | 2.190915 | -        | - |   |
| 6156  | TB1G00615 ENSSSCG0 COPB2     |           | 13    | 87895226 | 87930998 | -      | CODING | NEW_AS       | coatomer 1   | 7       | 74.2013 | 65.1686 | 67.5623 | 30.7361  | 2.414142 | 2.120262 | 2.198142 | - | - |
| 25095 | TB1G02509 ENSSSCG0 SAMD9     |           | 9     | 79679765 | 79714213 | -      | CODING | NEW_AS       | sterile like | 7       | 58.1417 | 61.0172 | 49.9107 | 22.6889  | 2.562651 | 2.689297 | 2.199785 | - | - |
| 23067 | TB1G02306 ENSSSCG0 TBC1D1    |           | 8     | 30778696 | 30793855 | -      | CODING | NEW_AS       | Uncharact    | 7       | 45.979  | 48.4195 | 43.8218 | 19.8785  | 2.313001 | 2.435772 | 2.204482 | - | - |
| 9682  | TB1G00968 ENSSSCG0 IL7R      |           | 16    | 22278436 | 22314407 | +      | CODING | NEW_AS       | interleukin  | 7       | 103.834 | 64.531  | 65.7059 | 29.8034  | 3.483965 | 2.165223 | 2.204644 | - | - |
| 3957  | TB1G00395 ENSSSCG0 NBR1      |           | 12    | 20093103 | 20126422 | +      | CODING | NEW_AS       | neighbor c   | 7       | 36.1676 | 27.5106 | 29.4027 | 13.3027  | 2.718816 | 2.068046 | 2.210281 | - | - |
| 26515 | TB1G02651 XLOC_0261 HSPA6    | GL893523. | 1     | 293      | -        | CODING | NOVEL  | Heat shoel   | 7            | 103.493 | 93.2129 | 82.0541 | 36.9707 | 2.799325 | 2.521264 | 2.219436 | -        | - |   |
| 21900 | TB1G02190 XLOC_0211 FAM65B   |           | 7     | 20752463 | 20990945 | -      | CODING | NEW_AS       | Protein FA   | 7       | 142.59  | 124.416 | 119.218 | 53.5648  | 2.662009 | 2.322719 | 2.225678 | - | - |
| 19813 | TB1G01981 ENSSSCG0 IST1      |           | 6     | 14464800 | 14489691 | -      | CODING | NEW_AS       | Uncharact    | 7       | 51.0404 | 38.8494 | 37.9261 | 16.9292  | 3.014933 | 2.294816 | 2.240277 | - | - |
| 24530 | TB1G02453 ENSSSCG0 PDI4A     |           | 9     | 1.2E+08  | 1.2E+08  | +      | CODING | NEW_AS       | protein dis  | 7       | 88.6251 | 115.53  | 83.4976 | 37.0335  | 2.393106 | 3.119608 | 2.254651 | - | - |
| 28296 | TB1G02829 XLOC_0281 IGHG4    | GL896171. | 5     | 540      | +        | CODING | NOVEL  | Ig gamma     | 7            | 247.21  | 661.85  | 276.828 | 121.593 | 2.033094 | 5.443159 | 2.276677 | -        | - |   |
| 7854  | TB1G00785 ENSSSCG0 ANKRD13   |           | 14    | 43479365 | 43506038 | -      | CODING | NEW_AS       | Ankyrin rej  | 7       | 53.4606 | 38.9802 | 41.5515 | 18.2352  | 2.931725 | 2.137635 | 2.278642 | - | - |
| 21865 | TB1G02186 ENSSSCG0 F13A1     |           | 7     | 3721329  | 4102833  | -      | CODING | NEW_AS       | Uncharact    | 7       | 349.897 | 277.55  | 213.936 | 93.4317  | 3.74495  | 2.970619 | 2.289758 | - | - |
| 19841 | TB1G01984 ENSSSCG0 GOT2      |           | 6     | 18501596 | 18507494 | -      | CODING | NEW_AS       | glutamic-o   | 7       | 34.05   | 29.3039 | 32.9471 | 14.3514  | 2.372591 | 2.041884 | 2.295741 | - | - |
| 5846  | TB1G00584 ENSSSCG0 CMTM6     |           | 13    | 20261322 | 20287139 | -      | CODING | NEW_AS       | CKL-like 1   | 7       | 48.8546 | 39.7929 | 38.4579 | 16.647   | 2.934739 | 2.390395 | 2.3102   | - | - |
| 26357 | TB1G02635 ENSSSCG0 HA1B_BOV  | GL893304. | 28077 | 43963    | -        | CODING | NEW_AS | BOLA class   | 7            | 76.7646 | 55.8364 | 57.9475 | 25.0711 | 3.061876 | 2.227122 | 2.311327 | -        | - |   |
| 8519  | TB1G00851 ENSSSCG0 DARS      |           | 15    | 18269639 | 18344270 | +      | CODING | NEW_AS       | aspartyl-tR  | 7       | 54.9954 | 43.8047 | 44.5019 | 19.1791  | 2.867465 | 2.283981 | 2.320333 | - | - |
| 28137 | TB1G02813 ENSSSCG0 CTDSP2    | GL895994. | 29300 | 45360    | -        | CODING | NEW_AS | CTD (carb    | 7            | 96.8499 | 75.802  | 83.4617 | 35.876  | 2.699574 | 2.112889 | 2.326394 | -        | - |   |
| 5269  | TB1G00526 ENSSSCG0 Nbeal2    |           | 13    | 33122342 | 33133683 | +      | CODING | NEW_AS       | Uncharact    | 7       | 83.186  | 65.6626 | 53.316  | 22.8995  | 3.632656 | 2.867425 | 2.32826  | - | - |
| 2766  | TB1G00276 ENSSSCG0 KLF6      |           | 10    | 72992249 | 73001823 | +      | CODING | NEW_AS       | Kruppel-lik  | 7       | 54.4766 | 36.1548 | 40.2427 | 17.2591  | 3.156399 | 2.094825 | 2.33168  | - | - |
| 22050 | TB1G02205 ENSSSCG0 SLA-DRB*H |           | 7     | 29113063 | 29125516 | -      | CODING | NEW_AS       | Sus scrofa   | 7       | 145.019 | 176.295 | 136.157 | 58.0712  | 2.497262 | 3.035842 | 2.344656 | - | - |
| 10297 | TB1G01029 XLOC_0101 gag-pro  |           | 17    | 36964339 | 36974782 | +      | CODING | NOVEL        | Gag-Pro p    | 7       | 53.1501 | 43.9935 | 42.6527 | 18.0607  | 2.942859 | 2.435669 | 2.361631 | - | - |
| 29142 | TB1G02914 ENSSSCG0 VPS35     | GL896549. | 6363  | 23585    | -        | CODING | NEW_AS | vacuolar p   | 7            | 40.8995 | 35.8611 | 38.9961 | 16.4955 | 2.479434 | 2.173993 | 2.364045 | -        | - |   |
| 10710 | TB1G01071 ENSSSCG0 NDRG3     |           | 17    | 45359657 | 45427454 | -      | CODING | NEW_AS       | NDRG fam     | 7       | 29.3645 | 26.1356 | 28.4647 | 12.0392  | 2.439074 | 2.170875 | 2.364335 | - | - |
| 9804  | TB1G00980 ENSSSCG0 RNF145    |           | 16    | 70068344 | 70121376 | +      | CODING | NEW_AS       | ring finger  | 7       | 68.0868 | 48.5401 | 46.4501 | 19.524   | 3.487339 | 2.486176 | 2.379128 | - | - |
| 17806 | TB1G01780 ENSSSCG0 LRRK2     |           | 5     | 74510800 | 74657314 | +      | CODING | NEW_AS       | Sus scrofa   | 7       | 42.6593 | 32.0993 | 35.5483 | 14.8942  | 2.864155 | 2.155154 | 2.386721 | - | - |
| 19760 | TB1G01976 XLOC_0191 Irf8     |           | 6     | 3330963  | 3340067  | -      | CODING | NOVEL        | Interferon   | 7       | 51.2276 | 62.8791 | 33.162  | 13.8726  | 3.692718 | 4.532611 | 2.390468 | - | - |
| 11031 | TB1G01103 ENSSSCG0 GIMAP4    |           | 18    | 6609767  | 6621208  | +      | CODING | NEW_AS       | GM2 gang     | 7       | 68.199  | 61.324  | 63.577  | 26.4872  | 2.574791 | 2.315549 | 2.399994 | - | - |
| 28410 | TB1G02841 ENSSSCG0 SURF4     | GL896220. | 574   | 4799     | -        | CODING | NEW_AS | surfeit 4 [S | 7            | 53.658  | 62.036  | 59.3858 | 24.6938 | 2.172934 | 2.51221  | 2.404887 | -        | - |   |
| 7831  | TB1G00783 ENSSSCG0 CLC8B1    |           | 14    | 41244220 | 41251489 | -      | CODING | NOVEL        | solute car   | 7       | 95.9113 | 107.421 | 50.6975 | 20.9724  | 4.573215 | 5.122018 | 2.417344 | - | - |
| 10034 | TB1G01003 ENSSSCG0 GM2A      |           | 16    | 77974389 | 77987652 | -      | CODING | NEW_AS       | GM2 gang     | 7       | 84.9733 | 80.5477 | 62.3129 | 25.6403  | 3.314052 | 3.141449 | 2.430272 | - | - |
| 7292  | TB1G00729 ENSSSCG0 MAPK1     |           | 14    | 53599167 | 53615840 | +      | CODING | NEW_AS       | mitogen-a    | 7       | 94.8376 | 76.3225 | 76.2807 | 31.1684  | 3.042748 | 2.448714 | 2.447373 | - | - |
| 12463 | TB1G01246 ENSSSCG0 REEP5     |           | 2     | 1.21E+08 | 1.22E+08 | +      | CODING | NEW_AS       | receptor a1  | 7       | 107.834 | 79.594  | 97.9111 | 39.7888  | 2.71016  | 2.000412 | 2.46077  | - | - |
| 21799 | TB1G02179 ENSSSCG0 PAPLA     |           | 7     | 1.25E+08 | 1.25E+08 | +      | CODING | NEW_AS       | poly(A) po   | 7       | 55.3282 | 43.4424 | 51.6498 | 20.9783  | 2.637402 | 2.070826 | 2.462058 | - | - |
| 6699  | TB1G00696 ENSSSCG0 PTPN12    |           | 1     | 2.26E+08 | 2.26E+08 | +      | CODING | NEW_AS       | protein ty   | 7       | 39.2649 | 33.3557 | 27.0746 | 19.9855  | 3.574248 | 3.063339 | 2.464576 | - | - |
| 283   | TB1G00283 ENSSSCG0 NARS      |           | 1     | 1.17E+08 | 1.18E+08 | +      | CODING | NEW_AS       | asparagine   | 7       | 56.5282 | 41.5603 | 50.6499 | 20.5254  | 2.754061 | 2.024823 | 2.469862 | - | - |
| 26677 | TB1G02667 ENSSSCG0 APMAP     | GL893705. | 64290 | 67208    | -        | CODING | KNOWN  | Adipocyte    | 7            | 72.161  | 67.4088 | 50.6346 | 20.4636 | 3.52631  | 3.294083 | 2.474374 | -        | - |   |
| 7800  | TB1G00780 ENSSSCG0 ANAPC7    |           | 14    | 33669495 | 33718033 | -      | CODING | NEW_AS       | anaphase 1   | 7       | 26.7281 | 23.1358 | 27.8188 | 11.2345  | 2.379109 | 2.059353 | 2.476194 | - | - |
| 16321 | TB1G01632 XLOC_0161 ARNT     |           | 4     | 1.08E+08 | 1.08E+08 | +      | CODING | NEW_AS       | Aryl hydro   | 7       | 36.3501 | 25.9563 | 31.7854 | 12.8186  | 2.835731 | 2.024894 | 2.479631 | - | - |
| 29769 | TB1G02976 ENSSSCG0 TXNDC11   | JH118940. | 20412 | 78632    | -        | CODING | NEW_AS | Uncharact    | 7            | 28.6043 | 29.7805 | 27.3208 | 11.0172 | 2.596331 | 2.703092 | 2.479832 | -        | - |   |
| 17615 | TB1G01761 ENSSSCG0 GLB1      | GL894277. | 5160  | 12749    | -        | CODING | KNOWN  | Uncharact    | 7            | 75.0143 | 62.4706 | 75.7414 | 30.5424 | 2.456071 | 2.045373 | 2.479877 | -        | - |   |
| 20161 | TB1G01061 ENSSSCG0 ACS51     |           | 17    | 34949431 | 34988723 | -      | CODING | NEW_AS       | acyl-CoA s   | 7       | 41.1264 | 43.7668 | 45.6065 | 18.3511  | 2.241086 | 2.384969 | 2.485219 | - | - |
| 21149 | TB1G02114 ENSSSCG0 BLOC1C55  |           | 7     | 5327730  | 5546412  | +      | CODING | NOVEL        | biogenesis   | 7       | 105.903 | 220.49  | 125.448 | 50.0105  | 2.117615 | 4.408874 | 2.508433 | - | - |
| 2781  | TB1G00278 ENSSSCG0 DCTN5     |           | 10    | 2661     | 17242    | -      | CODING | KNOWN        | dynactin 5   | 7       | 44.4534 | 43.0362 | 51.9809 | 20.7122  | 2.146242 | 2.077819 | 2.509675 | - | - |
| 7201  | TB1G00720 ENSSSCG0 MLEC      |           | 14    | 43069385 | 43084765 | -      | CODING | NEW_AS       | malleatin [  | 7       | 24.1558 | 20.7292 | 25.9667 | 10.2856  | 2.348507 | 2.051361 | 2.524568 | - | - |
| 5193  | TB1G00519 ENSSSCG0 UBP1      |           | 13    | 20784893 | 20832356 | -      | CODING | NEW_AS       | upstream 1   | 7       | 44.4955 | 31.7645 | 38.3249 | 15.1034  | 2.946509 | 2.103136 | 2.537501 | - | - |
| 5228  | TB1G00522 ENSSSCG0 CTNNB1    |           | 13    | 27623074 | 27667302 | +      | CODING | NEW_AS       | Sus scrofa   | 7       | 74.8559 | 55.7844 | 64.5247 | 25.4027  | 2.946769 | 2.196003 | 2.540073 | - | - |
| 1806  | TB1G00180 ENSSSCG0 ROD1      |           | 1     | 2.84E+08 | 2.84E+08 | -      | CODING | NEW_AS       | Sus scrofa   | 7       | 48.5353 | 37.1763 | 44.8866 | 17.5447  | 2.76638  | 2.118948 | 2.558414 | - | - |
| 9319  | TB1G00931 ENSSSCG0 AGFG1     |           | 15    | 1.43E+08 | 1.43E+08 | -      | CODING | NEW_AS       | ArfGAP w/    | 7       | 26.7001 | 27.9922 | 30.6422 | 11.9064  | 2.24251  | 2.351021 | 2.573591 | - | - |
| 28741 | TB1G02874 XLOC_0281 Exoc3    | GL896361. | 60175 | 62637    | -        | CODING | NOVEL  | Exocyst co   | 7            | 27.9099 | 30.1452 | 34.8522 | 13.5323 | 2.062465 | 2.227648 | 2.575482 | -        | - |   |
| 9345  | TB1G00934 ENSSSCG0 Inpp5d    |           | 15    | 1.48E+08 | 1.48E+08 | -      | CODING | NEW_AS       | Uncharact    | 7       | 61.8168 | 54.6138 | 68.8704 | 26.6813  | 2.316859 | 2.046894 | 2.581224 | - | - |
| 9153  | TB1G00915 ENSSSCG0 WIPF1     |           | 15    | 89757199 | 89837471 | -      | CODING | NEW_AS       | WAS/WAS      | 7       | 102.675 | 77.0715 | 92.5996 | 35.8474  | 2.864224 | 2.149989 | 2.583161 | - | - |
| 3323  | TB1G00332 ENSSSCG0 ELF1      |           | 11    | 26327366 | 26385565 | +      | CODING | NEW_AS       | E74-like fa  | 7       | 91.1587 | 66.9882 | 71.7486 | 27.7247  | 3.287996 | 2.416192 | 2.587895 | - | - |
| 30616 | TB1G03061 ENSSSCG0 ARHGFE6   | X         | 1     | 1.28E+08 | 1.28E+08 | -      | CODING | NEW_AS       | Rac/Cdc42    | 7       | 36.0784 | 29.9378 | 31.1084 | 11.9858  | 3.010095 | 2.477752 | 2.595438 | - | - |
| 10713 | TB1G01071 ENSSSCG0 SAMHD1    |           | 17    | 45556581 | 45582808 | -      | CODING | NEW_AS       | Uncharact    | 7       | 87.8642 | 60.2169 | 74.5792 | 28.5531  | 3.077221 | 2.108944 | 2.611948 | - | - |
| 19651 | TB1G01965 ENSSSCG0 EPS15     |           | 6     | 1.48E+08 | 1.48E+08 | +      | CODING | NEW_AS       | epidermal    | 7       | 31.4888 | 22.646  | 26.6061 | 10.1686  | 3.09667  | 2.227052 | 2.616496 | - | - |
| 27156 | TB1G02715 ENSSSCG0 NLRC5     | GL894265. | 7198  | 10643    | -        | CODING | NEW_AS | Protein NL   | 7            | 214.497 | 167.438 | 180.653 | 68.9464 | 3.111069 | 2.428524 | 2.620195 | -        | - |   |
| 15176 | TB1G01517 ENSSSCG0 RPIA      |           | 3     | 59834045 | 59864868 | -      | CODING | NEW_AS       | ribose 5-1   |         |         |         |         |          |          |          |          |   |   |

|       |                    |          |           |           |          |   |        |        |              |   |         |         |         |         |          |          |          |   |   |
|-------|--------------------|----------|-----------|-----------|----------|---|--------|--------|--------------|---|---------|---------|---------|---------|----------|----------|----------|---|---|
| 5736  | TBIG00573 XLOC_005 | GBE1     | 13        | 1.84E+08  | 1.84E+08 | + | CODING | NOVEL  | 1.4-alpha-i  | 7 | 74.1595 | 70.6589 | 78.2403 | 25.4132 | 2.918149 | 2.780402 | 3.078727 | - | - |
| 13370 | TBIG01337 ENSSSCG0 | CANX     | 2         | 8.0445609 | 80482509 | - | CODING | KNOWN  | calnexin [S  | 7 | 54.6557 | 40.8975 | 51.797  | 16.8076 | 3.251844 | 2.433274 | 3.081761 | - | - |
| 16477 | TBIG01647 ENSSSCG0 | GBP1     | 4         | 1.39E+08  | 1.4E+08  | + | CODING | NEW_AS | Sus scrofa   | 7 | 191.634 | 131.65  | 180.467 | 57.8376 | 3.313312 | 2.726201 | 3.120237 | - | - |
| 20551 | TBIG02055 ENSSSCG0 | JAK1     | 6         | 1.36E+08  | 1.36E+08 | - | CODING | NEW_AS | Janus kina   | 7 | 200.684 | 127.755 | 143.562 | 45.9455 | 4.367871 | 2.780577 | 3.124615 | - | - |
| 17433 | TBIG01743 ENSSSCG0 | IL2RB    | 5         | 8.223890  | 8249820  | - | CODING | NEW_AS | Uncharact    | 7 | 83.5944 | 53.3671 | 79.5051 | 25.4298 | 3.287261 | 2.098605 | 3.126454 | - | - |
| 14174 | TBIG01417 XLOC_014 | GBAS     | 3         | 1.7205926 | 17219756 | + | CODING | NOVEL  | Protein Nij  | 7 | 57.5279 | 47.9816 | 62.7497 | 19.8058 | 2.904599 | 2.422603 | 3.168249 | - | - |
| 27593 | TBIG02759 ENSSSCG0 | ELP3     | GL894948. | 1037      | 6292     | + | CODING | KNOWN  | Uncharact    | 7 | 36.4931 | 26.4841 | 37.4437 | 11.7946 | 3.094052 | 2.254543 | 3.174648 | - | - |
| 22505 | TBIG02250 ENSSSCG0 | TMED10   | 7         | 1.04E+08  | 1.04E+08 | - | CODING | NEW_AS | transmemt    | 7 | 56.1532 | 42.405  | 55.4414 | 17.3964 | 3.227863 | 2.437573 | 3.186947 | - | - |
| 27159 | TBIG02715 XLOC_027 | Jak1     | GL894267. | 3         | 422      | - | CODING | NOVEL  | Tyrosine-p   | 7 | 148.38  | 95.8767 | 127.726 | 40.0643 | 3.703547 | 2.393071 | 3.188025 | - | - |
| 6206  | TBIG00620 ENSSSCG0 | CCNL1    | 13        | 1.05E+08  | 1.05E+08 | - | CODING | NEW_AS | cyclin LI [! | 7 | 42.4061 | 32.4785 | 43.9096 | 13.742  | 3.085875 | 2.363448 | 3.195285 | - | - |
| 15270 | TBIG01527 ENSSSCG0 | ACTR2    | 3         | 80487337  | 80525402 | - | CODING | KNOWN  | Sus scrofa   | 7 | 192.817 | 125.065 | 198.3   | 61.4546 | 3.137552 | 2.03508  | 3.226772 | - | - |
| 16714 | TBIG01671 ENSSSCG0 | RCS2D1   | 4         | 90996577  | 91079847 | - | CODING | NEW_AS | RCS2 dom     | 7 | 69.7956 | 53.0808 | 79.5734 | 24.592  | 2.838142 | 2.158458 | 3.235743 | - | - |
| 14375 | TBIG01437 ENSSSCG0 | FAM120A  | 3         | 44107429  | 44330948 | + | CODING | NEW_AS | family with  | 7 | 36.7947 | 26.4047 | 41.9108 | 12.9051 | 2.851175 | 2.046067 | 3.247615 | - | - |
| 1532  | TBIG00153 ENSSSCG0 | VPS4B    | 1         | 1.76E+08  | 1.76E+08 | - | CODING | NEW_AS | vacuolar p   | 7 | 38.9495 | 28.78   | 45.7719 | 14.0411 | 2.773964 | 2.049697 | 3.259851 | - | - |
| 23467 | TBIG02346 XLOC_023 | TLR6     | 8         | 31625693  | 31660825 | - | CODING | NEW_AS | Toll-like re | 7 | 30.051  | 24.2306 | 35.6839 | 10.9276 | 2.750009 | 2.217376 | 3.265484 | - | - |
| 6363  | TBIG00636 ENSSSCG0 | ATP6V1A  | 13        | 1.56E+08  | 1.56E+08 | - | CODING | NEW_AS | ATPase, H-   | 7 | 30.805  | 24.7878 | 34.899  | 10.6734 | 2.886147 | 2.32239  | 3.269717 | - | - |
| 23594 | TBIG02359 ENSSSCG0 | G3BP2    | 8         | 75410919  | 75499534 | - | CODING | NEW_AS | GTPase acti  | 7 | 33.475  | 21.596  | 35.01   | 10.5393 | 3.176207 | 2.049092 | 3.321852 | - | - |
| 28212 | TBIG02821 ENSSSCG0 | YIPF5    | GL896100. | 827       | 9421     | - | CODING | KNOWN  | protein YIF  | 7 | 41.5617 | 32.426  | 51.9762 | 15.5571 | 2.671558 | 2.084322 | 3.340895 | - | - |
| 30078 | TBIG03007 ENSSSCG0 | OGT      | X         | 64962766  | 65000187 | + | CODING | NEW_AS | Sus scrofa   | 7 | 111.033 | 75.2087 | 117.309 | 35.0493 | 3.167909 | 2.145797 | 3.346971 | - | - |
| 15358 | TBIG01535 ENSSSCG0 | PRKD3    | 3         | 1.09E+08  | 1.1E+08  | - | CODING | NEW_AS | protein kin  | 7 | 44.5871 | 28.3631 | 39.2181 | 11.67   | 3.82066  | 2.430428 | 3.360591 | - | - |
| 1479  | TBIG00147 ENSSSCG0 | THBS1    | 1         | 1.47E+08  | 1.47E+08 | - | CODING | NEW_AS | Sus scrofa   | 7 | 79.0614 | 46.4264 | 40.2191 | 11.9141 | 6.635952 | 3.896761 | 3.375756 | - | - |
| 9990  | TBIG00999 XLOC_009 | DOCK2    | 16        | 58744789  | 58751935 | + | CODING | NOVEL  | Dedicator    | 7 | 78.0226 | 63.5007 | 94.6406 | 27.8784 | 2.798676 | 2.277774 | 3.394764 | - | - |
| 27870 | TBIG02787 ENSSSCG0 | HIATL1   | GL895478. | 11241     | 49084    | - | CODING | NEW_AS | Sus scrofa   | 7 | 47.1809 | 37.9099 | 34.7135 | 10.0602 | 4.689857 | 3.768305 | 3.450578 | - | - |
| 5459  | TBIG00545 ENSSSCG0 | SRPRB    | 13        | 82474461  | 82496616 | + | CODING | KNOWN  | signal rec   | 7 | 51.5088 | 40.1247 | 54.1702 | 15.4301 | 3.338203 | 2.600417 | 3.510684 | - | - |
| 2860  | TBIG00286 ENSSSCG0 | PTPRC    | 10        | 26246556  | 26287845 | + | CODING | NEW_AS | Uncharact    | 7 | 393.984 | 274.914 | 396.897 | 112.639 | 3.497758 | 2.414031 | 3.52362  | - | - |
| 3345  | TBIG00334 ENSSSCG0 | NDFIP2   | 11        | 56246092  | 56312418 | + | CODING | NEW_AS | Nedd4 fru    | 7 | 54.5985 | 29.9039 | 49.7824 | 14.115  | 3.868119 | 2.11859  | 3.526915 | - | - |
| 9201  | TBIG00920 ENSSSCG0 | STK17B   | 15        | 1.11E+08  | 1.11E+08 | - | CODING | NEW_AS | serine/thre  | 7 | 122.075 | 71.9184 | 115.152 | 32.107  | 3.80213  | 2.23996  | 3.586508 | - | - |
| 27266 | TBIG02726 XLOC_027 | Dync1h1  | GL894475. | 19        | 942      | + | CODING | NOVEL  | Cytoplasm    | 7 | 27.1342 | 20.8042 | 36.3496 | 10.0862 | 2.69023  | 2.02624  | 3.603894 | - | - |
| 29714 | TBIG02971 XLOC_029 | TM9SF2   | JH118897. | 8484      | 27691    | + | CODING | NOVEL  | Transmeml    | 7 | 55.1815 | 44.7188 | 68.8485 | 19.0685 | 2.893856 | 2.345166 | 3.610588 | - | - |
| 873   | TBIG00087 ENSSSCG0 | RAB14    | 1         | 2.93E+08  | 2.94E+08 | + | CODING | NEW_AS | RAB14, me    | 7 | 37.8024 | 30.173  | 44.1384 | 12.1287 | 3.116773 | 2.487736 | 3.639197 | - | - |
| 10459 | TBIG01045 ENSSSCG0 | CSE1L    | 17        | 57095159  | 57109228 | - | CODING | KNOWN  | CSE1 chroi   | 7 | 79.6241 | 39.0217 | 59.4584 | 15.9775 | 4.983514 | 2.442291 | 3.721383 | - | - |
| 16083 | TBIG01608 ENSSSCG0 | TRAM1    | 4         | 70399155  | 70431004 | + | CODING | NEW_AS | translocati  | 7 | 80.5535 | 63.1363 | 90.0989 | 24.0047 | 3.355739 | 2.630164 | 3.753386 | - | - |
| 5535  | TBIG00553 ENSSSCG0 | NLRP1    | 13        | 1.08E+08  | 1.08E+08 | + | CODING | KNOWN  | Uncharact    | 7 | 46.6606 | 26.0405 | 48.6281 | 12.8257 | 3.638055 | 2.030338 | 3.791458 | - | - |
| 27758 | TBIG02775 XLOC_027 | Tbk1     | GL895245. | 669       | 795      | - | CODING | NOVEL  | Serine/thre  | 7 | 239.69  | 317.129 | 321.825 | 84.848  | 2.837078 | 3.753681 | 3.809265 | - | - |
| 15977 | TBIG01597 ENSSSCG0 | KIAA0196 | 4         | 15149903  | 15246609 | + | CODING | NEW_AS | WASH con     | 7 | 37.1102 | 31.7119 | 44.7795 | 11.649  | 3.185698 | 2.722285 | 3.844064 | - | - |
| 30599 | TBIG03059 ENSSSCG0 | MS14     | X         | 1.24E+08  | 1.24E+08 | - | CODING | NEW_AS | Serine/thre  | 7 | 39.8961 | 20.2312 | 38.4758 | 10.0046 | 3.987776 | 2.02219  | 3.845811 | - | - |
| 10742 | TBIG01074 ENSSSCG0 | STK4     | 17        | 52872154  | 52878619 | - | CODING | KNOWN  | serine/thre  | 7 | 73.6392 | 51.4528 | 77.8127 | 19.9957 | 3.682752 | 2.573193 | 3.891472 | - | - |
| 23575 | TBIG02357 ENSSSCG0 | Igj      | 8         | 71347284  | 71358511 | - | CODING | KNOWN  | immunogl     | 7 | 442.434 | 585.16  | 476.436 | 122.085 | 3.623983 | 4.793054 | 3.902494 | - | - |
| 26699 | TBIG02669 XLOC_026 | INTS12   | GL893739. | 1798      | 12539    | + | CODING | NOVEL  | Integrator   | 7 | 53.9285 | 59.7287 | 72.6546 | 18.2814 | 2.949111 | 3.267184 | 3.974236 | - | - |
| 20352 | TBIG02035 ENSSSCG0 | ARID1A   | 6         | 77607451  | 77612795 | + | CODING | KNOWN  | AT rich int  | 7 | 39.2487 | 24.6264 | 40.7517 | 10.186  | 3.8532   | 2.417671 | 4.000756 | - | - |
| 2928  | TBIG02928 ENSSSCG0 | RAB5A    | JH118496. | 1977      | 24283    | - | CODING | KNOWN  | RAB5A, me    | 7 | 34.2504 | 28.9413 | 54.9243 | 13.7102 | 2.498169 | 2.110932 | 4.00609  | - | - |
| 5283  | TBIG00528 XLOC_000 | Zwilch   | 1         | 1.82E+08  | 1.82E+08 | + | CODING | NOVEL  | Protein zw   | 7 | 22.4381 | 21.2835 | 42.6459 | 10.5359 | 2.12968  | 2.020093 | 4.047675 | - | - |
| 16950 | TBIG01695 ENSSSCG0 | ST7L     | 4         | 1.18E+08  | 1.18E+08 | - | CODING | NOVEL  | suppressio   | 7 | 59.0845 | 28.5359 | 46.1817 | 11.266  | 5.244497 | 2.532922 | 4.09921  | - | - |
| 30491 | TBIG03049 ENSSSCG0 | MAGT1    | X         | 70812442  | 70877254 | + | CODING | NEW_AS | magnesiun    | 7 | 43.3067 | 32.2748 | 51.1111 | 12.4321 | 3.483458 | 2.596086 | 4.11122  | - | - |
| 29419 | TBIG02941 ENSSSCG0 | ZCCHC4   | JH118638. | 93888     | 288709   | + | CODING | NEW_AS | Uncharact    | 7 | 85.9682 | 12.3849 | 157.937 | 38.3551 | 2.241376 | -3.09692 | 4.117757 | - | - |
| 29981 | TBIG02998 ENSSSCG0 | DDX3X    | X         | 41161892  | 41177782 | + | CODING | KNOWN  | Uncharact    | 7 | 51.7024 | 29.5464 | 60.9819 | 14.6258 | 3.535013 | 2.020156 | 4.169474 | - | - |
| 136   | TBIG00013 ENSSSCG0 | SERINC1  | 1         | 44519709  | 44540322 | + | CODING | NEW_AS | Uncharact    | 7 | 161.371 | 77.035  | 130.549 | 30.9315 | 5.217044 | 2.490503 | 4.220584 | - | - |
| 15750 | TBIG01575 XLOC_015 | EXOC6B   | 3         | 73146787  | 73147018 | - | CODING | NOVEL  | Exocyst co   | 7 | 259.786 | 156.403 | 312.54  | 73.951  | 3.512948 | 2.114954 | 4.226312 | - | - |
| 27152 | TBIG02715 XLOC_027 | Nomo1    | GL894264. | 4444      | 10080    | - | CODING | NOVEL  | Nodal mo     | 7 | 62.8315 | 51.9085 | 92.2525 | 21.3114 | 2.948258 | 2.435715 | 4.328786 | - | - |
| 17904 | TBIG01790 XLOC_017 | PPP1R12A | 5         | 1.06E+08  | 1.07E+08 | + | CODING | NOVEL  | Protein ph   | 7 | 70.0987 | 44.0703 | 71.446  | 15.8748 | 4.415722 | 2.776117 | 4.500592 | - | - |
| 16023 | TBIG00602 ENSSSCG0 | HIF1A    | 1         | 2.12E+08  | 2.12E+08 | + | CODING | NEW_AS | Sus scrofa   | 7 | 51.869  | 33.759  | 57.0442 | 12.5835 | 4.121985 | 2.682799 | 4.533254 | - | - |
| 1266  | TBIG00126 ENSSSCG0 | CD164    | 1         | 84719535  | 84736132 | - | CODING | NEW_AS | Sialomucin   | 7 | 85.3405 | 63.603  | 120.15  | 25.3557 | 3.365732 | 2.50843  | 4.738579 | - | - |
| 13463 | TBIG01346 ENSSSCG0 | ERAP2    | 2         | 1.07E+08  | 1.07E+08 | - | CODING | NEW_AS | Uncharact    | 7 | 57.3708 | 32.2542 | 58.4791 | 12.2971 | 4.665393 | 2.622911 | 4.75552  | - | - |
| 10150 | TBIG01015 XLOC_010 | Dock2    | 16        | 58655196  | 58655489 | - | CODING | NOVEL  | Dedicator    | 7 | 77.1889 | 59.9841 | 103.385 | 21.7224 | 3.553424 | 2.761394 | 4.759373 | - | - |
| 25929 | TBIG02592 XLOC_025 | MCM6     | GL892768. | 76        | 196      | - | CODING | NOVEL  | DNA replic   | 7 | 200063  | 361204  | 135128  | 281582  | 7.104964 | 12.82767 | 4.798886 | - | - |
| 15175 | TBIG01517 ENSSSCG0 | IGKV1-5  | 3         | 59753693  | 59754231 | - | CODING | KNOWN  | Uncharact    | 7 | 292.246 | 311.217 | 338.211 | 69.6683 | 4.19482  | 4.467125 | 4.85459  | - | - |
| 24877 | TBIG02487 XLOC_024 | TMEM123  | 9         | 37031495  | 37080859 | - | CODING | NOVEL  | Porinim [S   | 7 | 85.9356 | 43.0955 | 105.712 | 21.3824 | 4.018988 | 2.015466 | 4.943879 | - | - |
| 18202 | TBIG01820 ENSSSCG0 | GNS      | 5         | 32134175  | 32173480 | - | CODING | KNOWN  | glucosamir   | 7 | 43.081  | 37.3886 | 55.5237 | 11.1391 | 3.867548 | 3.356519 | 4.984577 | - | - |
| 11082 | TBIG01108 XLOC_011 | Mtpn     | 18        | 14099503  | 14151591 | + | CODING | NOVEL  | Myotroph     | 7 | 45.4978 | 29.1578 | 73.1138 | 14.3838 | 3.163128 | 2.027128 | 5.083066 | - | - |
| 2977  | TBIG00297 ENSSSCG0 | ITGB1    | 10        | 61450695  | 61521893 | + | CODING | NEW_AS | integrin, b  | 7 | 96.9823 | 52.3312 | 89.0997 | 16.9243 | 5.730358 | 3.039275 | 5.264602 | - | - |
| 9208  | TBIG00920 ENSSSCG0 | SF3B1    | 15        | 1.12E+08  | 1.13E+08 | - | CODING | NEW_AS | splicing fa  | 7 | 108.572 | 59.6028 | 131.111 | 24.4846 | 4.434297 | 2.434297 | 5.354835 | - | - |
| 7577  | TBIG00757 ENSSSCG0 | ADD3     | 14        | 1.31E+08  | 1.31E+08 | + | CODING | NEW_AS | adducin 3    | 7 | 76.7192 | 41.1507 | 85.1385 | 15.7562 |          |          |          |   |   |
